# Supplementary material for: Base-promoted synthesis of tetrasubstituted alkenylboronates from propargyl amines and B2pin2via dual 1,4-metallate shift and B–N elimination
Source: Royal Society of Chemistry journal article supplement (doi:10.1039/d2qo01576e), 2022-12-22

**Supplemental Information**  
*for*  
**Base-Promoted Synthesis of Tetrasubstituted  
Alkenylboronates from Propargyl Amines and B<sub>2</sub>pin<sub>2</sub> via  
Dual 1,4-Metallate Shift and B-N Elimination**

Kang Liu<sup>1</sup>, Shengnan Jin<sup>1</sup> and Qiuling Song<sup>1,2,3\*</sup>

*<sup>1</sup>Institute of Next Generation Matter Transformation, College of Material Sciences Engineering,  
Huaqiao University, Xiamen, Fujian, 361021, China*

*<sup>2</sup>Key Laboratory of Molecule Synthesis and Function Discovery, Fujian Province University,  
College of Chemistry at Fuzhou University Fuzhou, Fujian, 350108, China*

*<sup>3</sup>School of Chemistry and Chemical Engineering, Henan Normal University, Xinxiang, Henan,  
453007, China*

*\*Corresponding author. Email: [qsong@hqu.edu.cn](mailto:qsong@hqu.edu.cn)*

## Table of Content

|                                                        |    |
|--------------------------------------------------------|----|
| 1. General Information .....                           | 3  |
| 2. General procedure for starting materials .....      | 4  |
| 3. Condition screenings .....                          | 6  |
| 4. General Process for the Synthesis of (3) .....      | 7  |
| 5. Mechanism studies .....                             | 8  |
| 6. Scale-up Reactions and Synthetic Applications ..... | 10 |
| 6.1 Gram-scale reaction.....                           | 10 |
| 6.2 Synthetic Applications.....                        | 10 |
| 7. Crystal Data.....                                   | 14 |
| 8. Characterization Data .....                         | 16 |
| 9. References .....                                    | 30 |
| 10. NMR Spectroscopic Data .....                       | 31 |

## 1. General Information

All reagents and solvents were purchased from Adamas Reagent, Energy Chemical Company, Bide Pharmatech Ltd., and Tansoole, and were used without further purification. Unless otherwise stated, all reactions were accomplished in Schlenk tubes under N<sub>2</sub> atmosphere. The reactions were monitored by thin layer chromatography (TLC) or gas chromatography-mass spectrometry (GC-MS). Flash column chromatography was performed over silica gel (200–300 mesh). <sup>1</sup>H NMR spectra were recorded on a Bruker Avance III 500 MHz (or 400 MHz) NMR spectrometer, and the chemical shifts (in ppm) were referred to CDCl<sub>3</sub> ( $\delta$  = 7.26 ppm) as an internal standard. <sup>13</sup>C NMR spectra were obtained by using the same NMR spectrometer and were calibrated with CDCl<sub>3</sub> ( $\delta$  = 77.0 ppm). <sup>11</sup>B NMR spectra were acquired with accessories on the same NMR spectrometer using CDCl<sub>3</sub>. <sup>19</sup>F NMR spectra were acquired with accessories on the same NMR spectrometer using CDCl<sub>3</sub>, too. The following abbreviations were used to illuminate the diversities:  $\delta$  = chemical shifts,  $J$  = coupling constant, s = singlet, d = doublet, t = triplet, q = quartet, m = multiplet. High-resolution mass spectra (HRMS; (ESI)) were acquired with quadrupole and time-of-flight (TOF) mass spectrometers. All reagents and solvents were obtained from commercial suppliers and used without further purification. Reactions were monitored by thin-layer chromatography (TLC). The products were purified by column chromatography on silica gel using petroleum ether and ethyl acetate as the eluent.

## 2. General procedure for starting materials

### 2.1 General Synthetic Procedure for 1a-1ae<sup>[1]</sup>

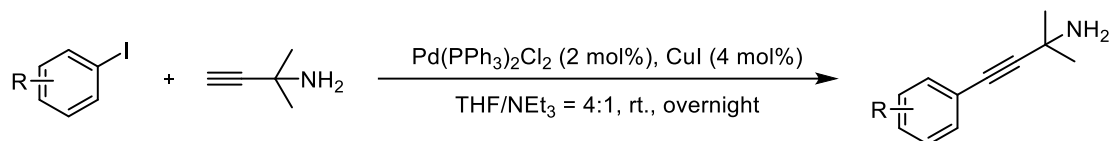

To a solution of THF (8 mL)/Et<sub>3</sub>N (2 mL) was added CuI (38.1 mg, 0.2 mmol, 4 mol%), Pd(PPh<sub>3</sub>)<sub>2</sub>Cl<sub>2</sub> (70.2 mg, 0.1 mmol, 2 mol%), and an aryl iodide (5.5 mmol, 1.1 equiv) under nitrogen. Then, a propargyl amine (5.0 mmol, 1.0 equiv) was added and the mixture was stirred overnight at room temperature. Upon the reaction was completed, a saturated NH<sub>4</sub>Cl aqueous solution was added and the mixture was extracted with Et<sub>2</sub>O three times. The combined organic layer was washed with brine and dried over anhydrous Na<sub>2</sub>SO<sub>4</sub>, filtered, and concentrated under reduced pressure. The residue was purified by silica gel column chromatography (PE/EA/Et<sub>3</sub>N=2:1:1%) to obtain the corresponding propargyl amine.

### 2.2 General Synthetic Procedure for 1af-1ag<sup>[7-8]</sup>

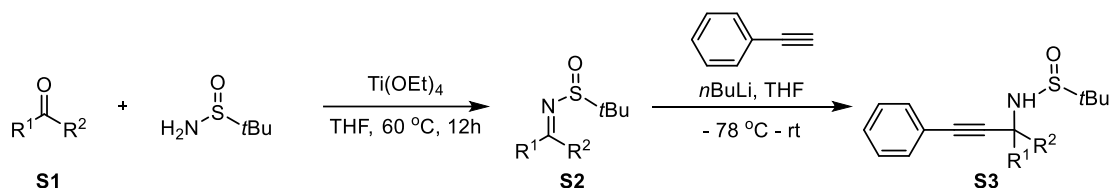

2-Methyl-2-propane-sulfonamide (841 mg, 6.94 mmol, 1.00 equiv) and titanium (IV) ethoxide (3.14 mL, 13.9 mmol, 2.00 equiv) were added sequentially to a solution of corresponding ketone **S1** (10 mmol, 1 equiv) in tetrahydrofuran (17.0 mL) at 22 °C. The mixture was stirred at 80 °C for 12 h. Upon the reaction was completed, a saturated NH<sub>4</sub>Cl aqueous solution was added and the mixture was extracted with EA three times. The combined organic layer was washed with brine and dried over anhydrous Na<sub>2</sub>SO<sub>4</sub>, filtered and concentrated under reduced pressure to give the crude product **S2**, which was used in the subsequent reaction without further purification.

To a solution of the phenylacetylene (4.4 mmol, 1.1 equiv) in THF (6 mL) under nitrogen gas was added n-butyllithium (2.75 mL, 4.4 mmol, 1.1 equiv, 1.60 M solution in hexane) dropwise at -78 °C. After 30 minutes' stirring, the reaction temperature was raised to 0 °C, and the solution was stirred for an hour. To the reaction mixture was added the corresponding imine (4.0 mmol, 1.1 equiv) in THF dropwise. After stirring for an hour, the reaction temperature was raised to room temperature and stirred overnight. Saturated NaHCO<sub>3</sub> aqueous solution was added to the reaction mixture upon completion, then extracted with EA three times. The combined organic layer was washed with brine, and then dried over anhydrous Na<sub>2</sub>SO<sub>4</sub>. After concentration under reduced pressure, the residue was purified by silicagel column chromatography (Hexane / EtOAc = 4 / 1). The corresponding sulfonamide with alkyne **S3** was obtained in 60% - 70% yield.

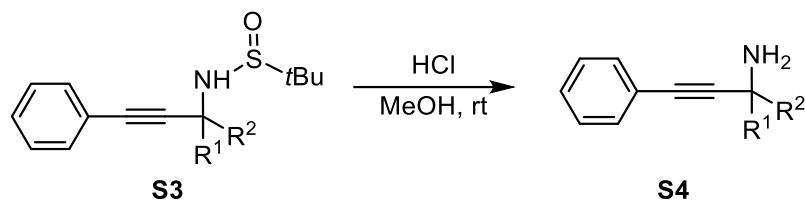

To a solution of the sulfinamide with alkyne **S3** (3.0 mmol, 1.0 equiv) in methanol (5 mL) was added 4.0 M HCl dioxane solution (2.25 mL, 9.0 mmol, 3.0 equiv) and stirred at room temperature overnight. Upon completion, methanol was removed under reduced pressure, and the residue was diluted with Et<sub>2</sub>O. To the Et<sub>2</sub>O solution was added NaOH aqueous solution (1.0 M) with stirring, and then extracted with Et<sub>2</sub>O three times. The combined organic layer was washed with brine and dried over anhydrous Na<sub>2</sub>SO<sub>4</sub>. After concentration under reduced pressure, the residue was purified with silicagel column chromatography (Hexane/EtOAc= 2/1). The corresponding primary propargylic amine **S4** was obtained in 80% - 90% yield.

### 3. Condition screenings

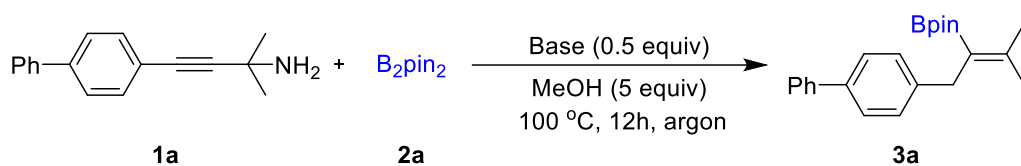

| Entry     | Base                                | Solvent            | Yield (%) |
|-----------|-------------------------------------|--------------------|-----------|
| 1         | K <sub>2</sub> CO <sub>3</sub>      | Toluene            | 15        |
| 2         | K <sub>2</sub> CO <sub>3</sub>      | THF                | 12        |
| 3         | K <sub>2</sub> CO <sub>3</sub>      | 1,4-Dioxane        | trace     |
| 4         | K <sub>2</sub> CO <sub>3</sub>      | CH <sub>3</sub> CN | 15        |
| 5         | K <sub>2</sub> CO <sub>3</sub>      | MeOH               | 60        |
| 6         | KOH                                 | MeOH               | 30        |
| 7         | KOMe                                | MeOH               | trace     |
| 8         | Rb <sub>2</sub> CO <sub>3</sub>     | MeOH               | 52        |
| 9         | CsF                                 | MeOH               | 40        |
| <b>10</b> | <b>Cs<sub>2</sub>CO<sub>3</sub></b> | <b>MeOH</b>        | <b>75</b> |

## 4. General Process for the Synthesis of (3)

### General Procedure A:

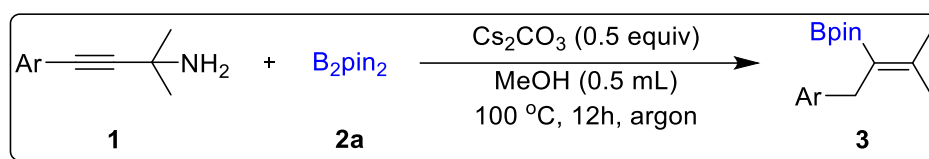

In air,  $B_2pin_2$  (5 equiv, 1 mmol) and  $Cs_2CO_3$  (0.5 equiv, 0.1 mmol) were added to a Schlenk tube equipped with a stir bar. The vessel was evacuated and filled with argon (three cycles). Then the **1** (1 equiv, 0.2 mmol) and MeOH (0.5 mL) was added under argon atmosphere. The resulting reaction mixture was stirred vigorously at  $100\text{ }^\circ\text{C}$  for 12 h. Then, the reaction mixture was concentrated to dryness. The crude product was purified by silica gel chromatography to afford the products.

### General Procedure B:

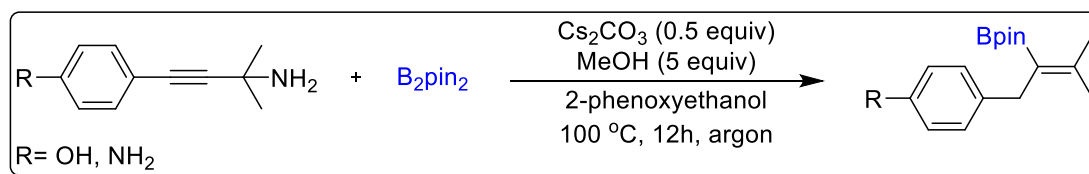

In air,  $B_2pin_2$  (5 equiv, 1 mmol) and  $Cs_2CO_3$  (0.5 equiv, 0.1 mmol) were added to a Schlenk tube equipped with a stir bar. The vessel was evacuated and filled with argon (three cycles). Then the propargyl amines (1 equiv, 0.2 mmol), MeOH (5 equiv) and 2-phenoxyethanol (0.5 mL) was added under argon atmosphere. The resulting reaction mixture was stirred vigorously at  $100\text{ }^\circ\text{C}$  for 12 h. Then, the reaction mixture was concentrated to dryness. The crude product was purified by silica gel chromatography to afford the products.

## 5. Mechanism studies

### General Procedure C:

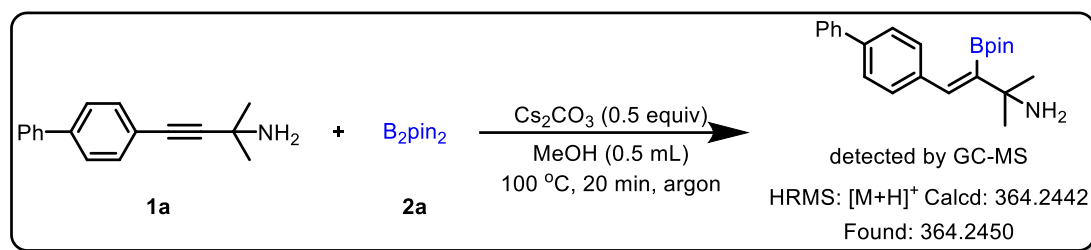

In air,  $B_2pin_2$  (5 equiv, 1 mmol) and  $Cs_2CO_3$  (0.5 equiv, 0.1 mmol) were added to a Schlenk tube equipped with a stir bar. The vessel was evacuated and filled with argon (three cycles). Then the **1a** (1 equiv, 0.2 mmol) and MeOH (0.5 mL) was added under argon atmosphere. The resulting reaction mixture was stirred vigorously at 100 °C for 20 min.

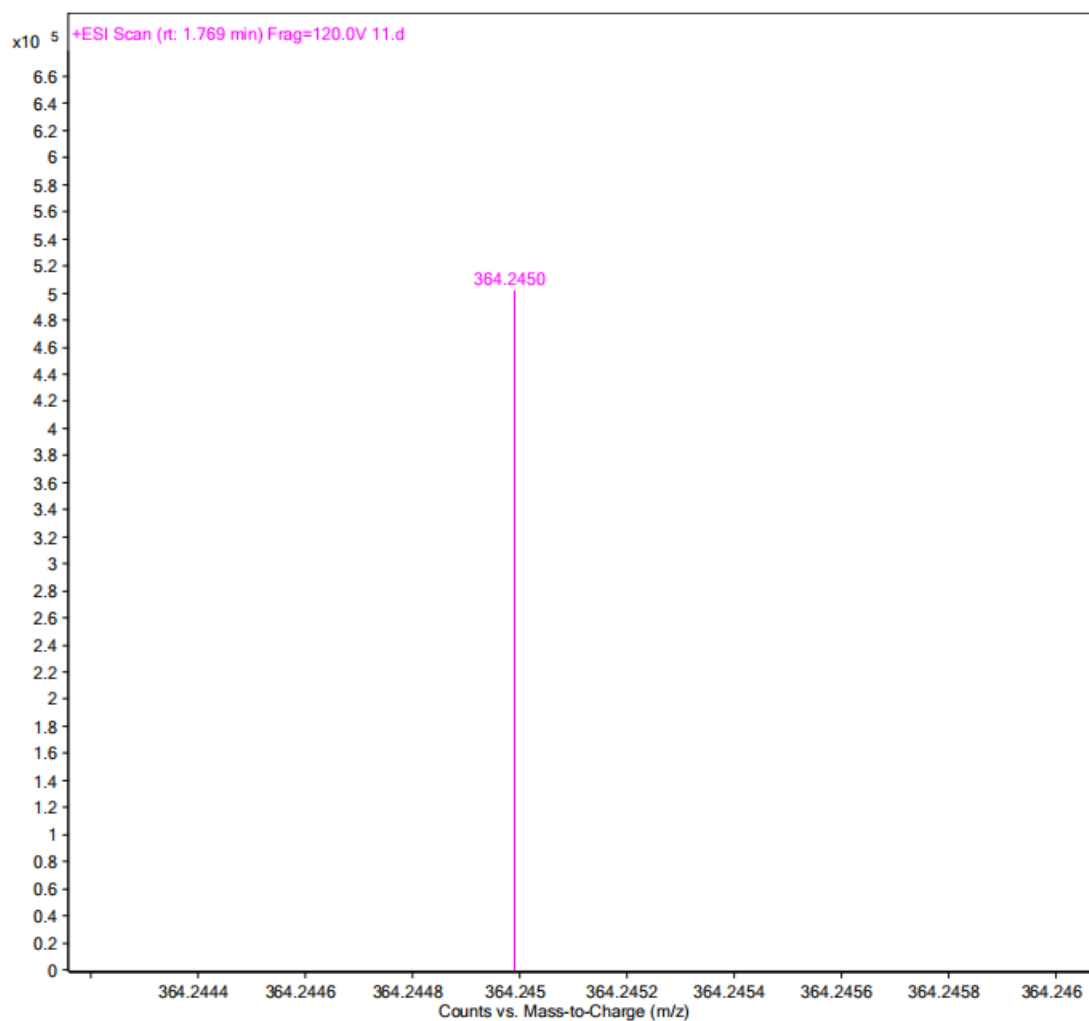



### General Procedure D:

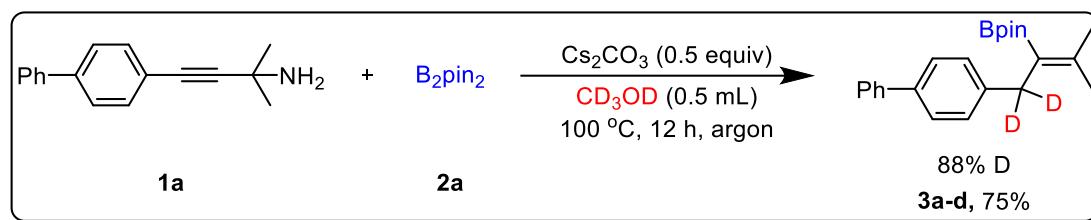

In air, B<sub>2</sub>pin<sub>2</sub> (5 equiv, 1 mmol) and Cs<sub>2</sub>CO<sub>3</sub> (0.5 equiv, 0.1 mmol) were added to a Schlenk tube equipped with a stir bar. The vessel was evacuated and filled with argon (three cycles). Then the **1** (1 equiv, 0.2 mmol) and CD<sub>3</sub>OD (0.5 mL) was added under argon atmosphere. The resulting reaction mixture was stirred vigorously at 100 °C for 12 h. Then, the reaction mixture was concentrated to dryness. The crude product was purified by silica gel chromatography to afford the products.

### General Procedure E:

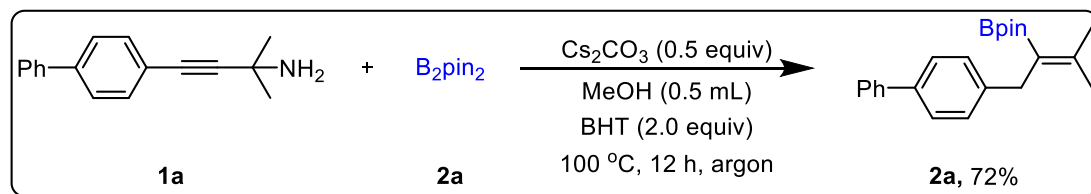

In air, B<sub>2</sub>pin<sub>2</sub> (5 equiv, 1 mmol), Cs<sub>2</sub>CO<sub>3</sub> (0.5 equiv, 0.1 mmol) and BHT (2 equiv, 0.4 mmol) were added to a Schlenk tube equipped with a stir bar. The vessel was evacuated and filled with argon (three cycles). Then the **1** (1 equiv, 0.2 mmol) and MeOH (0.5 mL) was added under argon atmosphere. The resulting reaction mixture was stirred vigorously at 100 °C for 12 h. Then, the reaction mixture was concentrated to dryness. The crude product was purified by silica gel chromatography to afford the products.

## 6. Scale-up Reactions and Synthetic Applications

### 6.1 Gram-scale reaction

#### General Procedure F:

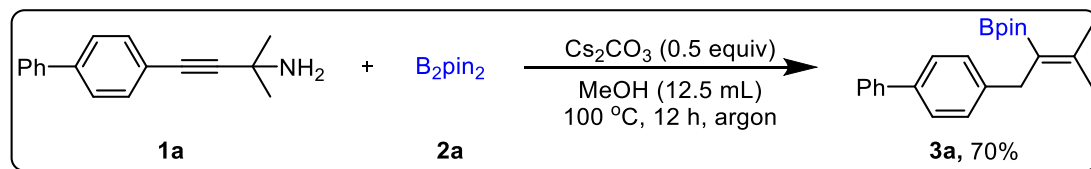

In air,  $B_2pin_2$  (5 equiv, 25 mmol) and  $Cs_2CO_3$  (0.5 equiv, 2.5 mmol) were added to a Schlenk tube equipped with a stir bar. The vessel was evacuated and filled with argon (three cycles). Then the **1** (1 equiv, 5 mmol) and MeOH (12.5 mL) was added under argon atmosphere. The resulting reaction mixture was stirred vigorously at 100 °C for 12 h. Then, the reaction mixture was concentrated to dryness. The crude product was purified by silica gel chromatography to afford the products.

### 6.2 Synthetic Applications

#### General Procedure G<sup>[2]</sup>:

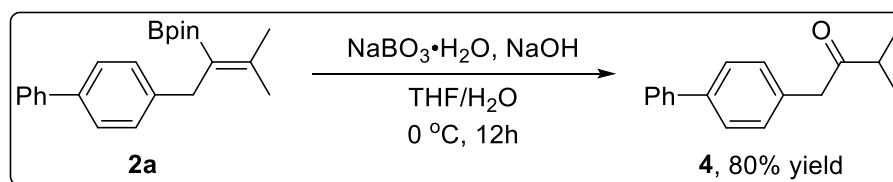

To a 25 mL Schlenk tube, was added **2a** (1 equiv, 0.2 mmol) followed by 0.3 mmol of sodium perborate monohydrate (1.5 equiv) under air. Then THF (0.8 mL) and H<sub>2</sub>O (0.8 mL) was added in ice-bath, with that the NaOH (aq.) was added by drop wise. The reaction mixture was stirred at 0- rt until full conversion by TLC. Then, the reaction mixture was extracted with EA/H<sub>2</sub>O. Subsequently, the organic layers were dried with  $Na_2SO_4$ , and concentrated to dryness. The crude product was purified by silica gel chromatography (silica gel, PE: EA =100:1, v/v) to afford the product with the yield of 80%.

### General Procedure H<sup>[3]</sup>:

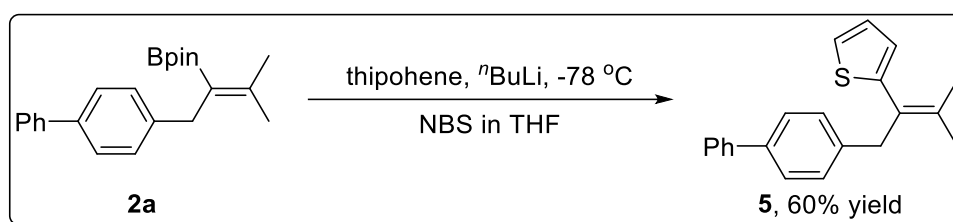

A solution of thiophene (1 mmol, 5.0 equiv) in THF (2.0 mL) was cooled to -78 °C and treated with <sup>n</sup>BuLi (1.6 M in hexanes, 1.2 mmol, 6.0 equiv). The cooling bath was removed and the mixture was stirred at room temperature for 1 h. The mixture was cooled to -78 °C and a solution of substrate **2a** (0.2 mmol, 1.0 equiv) in THF (1 mL) was added. The mixture was stirred at -78 °C for 1 h, and then a solution of NBS (1 mmol, 5.0 equiv) in THF (2.0 mL) was added. After 10 h at room temperature, sat. Na<sub>2</sub>S<sub>2</sub>O<sub>3</sub> (aq.) (4 mL) was added. The reaction mixture was diluted with water and extracted with ethyl acetate. The combined organic layers were dried over Na<sub>2</sub>SO<sub>4</sub> and concentrated in vacuo. The crude product was purified by silica gel chromatography (silica gel, PE: EA =50:1, v/v) to afford the product with the yield of 60%.

### General Procedure I<sup>[3]</sup>:

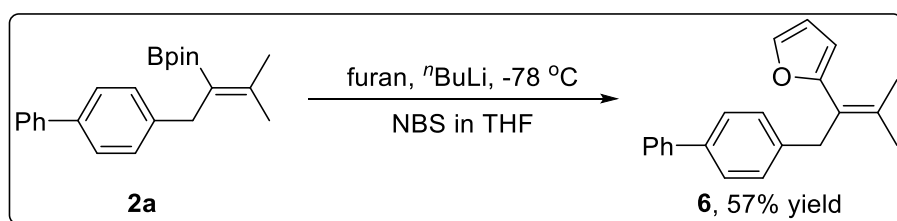

A solution of furan (0.5 mmol, 2.5 equiv) in THF (2.0 mL) was cooled to -78 °C and treated with <sup>n</sup>BuLi (1.6 M in hexanes, 0.6 mmol, 3 equiv). The cooling bath was removed and the mixture was stirred at room temperature for 1 h. The mixture was cooled to -78 °C and a solution of **2a** (0.2 mmol, 1.0 equiv) in THF (1 mL) was added. The mixture was stirred at -78 °C for 1 h, and then a solution of NBS (0.5 mmol, 2.5 equiv) in THF (2.0 mL) was added. After 10 h at room temperature, sat. Na<sub>2</sub>S<sub>2</sub>O<sub>3</sub> (aq.) (4 mL) was added. The reaction mixture was diluted with water and extracted with ethyl acetate. The combined organic layers were dried over Na<sub>2</sub>SO<sub>4</sub> and concentrated in vacuo. The crude product was purified by silica gel chromatography (silica gel, PE: EA =50:1, v/v) to afford the product with the yield of 57%.

### General Procedure J<sup>[4]</sup>:

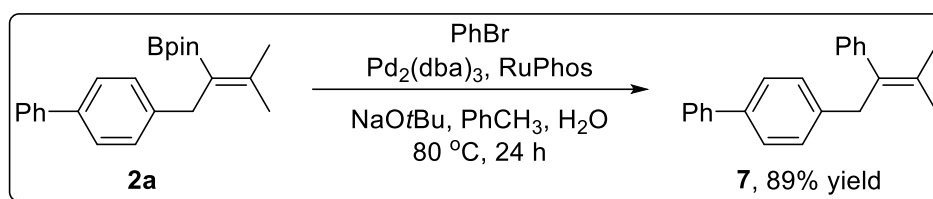

In air, Pd<sub>2</sub>(dba)<sub>3</sub> (4.6 mg, 0.005 mmol, 5.0 mol%), NaOtBu (28.8 mg, 0.3 mmol, 3.0 equiv), Ruphos (4.7 mg, 0.01 mmol, 10.0 mol%) and substrate **2a** (0.1 mmol, 1.0 equiv) were added to a Schlenk tube equipped with a stir bar. The vessel was evacuated and filled with argon (three cycles). Then PhCH<sub>3</sub> (1.0 mL), PhBr (15.7 mg, 0.1 mmol, 1.0 equiv) and H<sub>2</sub>O (0.1 mL) was added under argon atmosphere. The mixture was stirred at 80 °C for 24 hours. Then, the mixture was cooled to room temperature and diluted with DCM (20 mL). The organic layer was separated and the aqueous phase was extracted with DCM (20 mL x 2). The combined organic layer was washed with H<sub>2</sub>O (30 mL) and brine (30 mL). The combined organic layers were dried over Na<sub>2</sub>SO<sub>4</sub> and concentrated in vacuo. The crude product was purified by silica gel chromatography (silica gel, PE: EA =50:1, v/v) to afford the product with the yield of 89%.

### General Procedure K<sup>[5]</sup>:

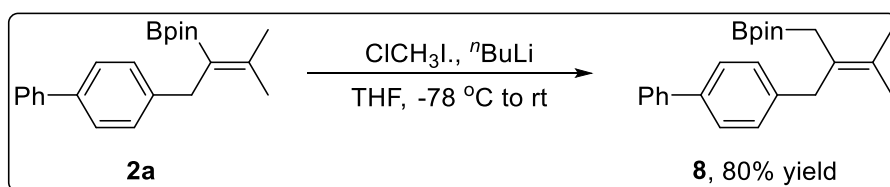

To a 25 mL Schlenk tube containing a magnetic stirbar, **2a** (0.20 mmol, 1.0 equiv) and chloriodomethane (0.6 mmol, 3.0 equiv) and THF (2.0 mL) were added under argon atmosphere. The reaction mixture was cooled to -78 °C and a solution of <sup>n</sup>BuLi (0.6 mmol, 1.6 M in hexane, 3.0 equiv) was slowly added at -78 °C. After stirring for 1 h, the reaction mixture was warmed to room temperature and additionally stirred for 24 h. The reaction was quenched with a saturated aqueous NH<sub>4</sub>Cl solution and extracted with EtOAc. The combined organic layers were dried over Na<sub>2</sub>SO<sub>4</sub>, filtered and concentrated under reduced pressure. The crude product was purified by silica gel chromatography (silica gel, PE: EA =100:1, v/v) to afford the product with the yield of

80%.

**General Procedure L<sup>[6]</sup>:**

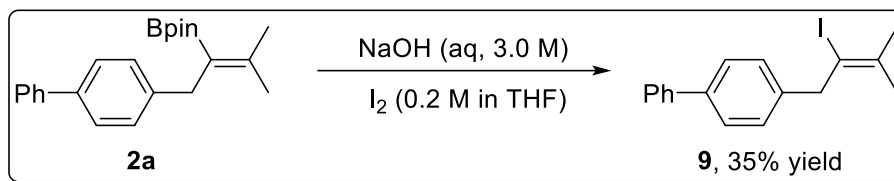

Under argon atmosphere, a solution of **2a** (0.2 mmol, 1.0 equiv) in THF (1 mL) was added NaOH (0.3 mL, 3 M in water) via a syringe. The resulting solution was stirred at ambient temperature for 10 min, followed by adding I<sub>2</sub> (2.0 mL, 0.2 M in THF) dropwise. The reaction mixture was then stirred at ambient temperature for around 2 h. After completion, the reaction was quenched with aqueous sodium thiosulfate and extracted with EtOAc (10 mL x 3). The combined organic layers were dried over Na<sub>2</sub>SO<sub>4</sub>, filtered and concentrated under reduced pressure. The crude product was purified by silica gel chromatography (silica gel, PE: EA =100:1, v/v) to afford the product with the yield of 35%.

**Unsuccessful substrate:**

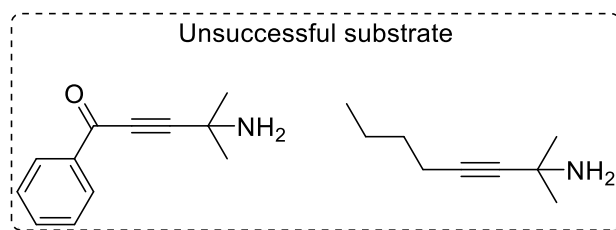

## 7. Crystal Data

### Crystal data of 3a

Method for single crystals cultivation: a pure solid sample (10–20 mg) was dissolved in ethyl acetate (2 mL) in a vial at room temperature, and petroleum ether/hexane (2–3 mL) was added into the above solution slowly while keeping the sample completely dissolved. The vial was properly sealed with parafilm and kept at room temperature to allow the slow evaporation of the solvents until a single crystal was obtained.

The data were collected on a Agilent Gemini E diffractometer (Mo, 50kV 40mA) instrument using Mo-K $\alpha$  radiation ( $\lambda = 0.71073 \text{ \AA}$ ) at 296 K and reduced by CrysAlisPro (Rigaku). The crystal structures were solved and refined using the SHELXTL software package. Refinements were performed with SHELXL-2013 using fullmatrix least-squares calculations on F<sup>2</sup>, with anisotropic displacement parameters for all the nonhydrogen atoms. The crystallographic data have already been deposited at the Cambridge Crystallographic Data Centre.

Crystallographic data for compound **3a** (CCDC-2162448) has been deposited with the Cambridge Crystallographic Data Centre, Copies of the data can be obtained, free of charge, on application to CCDC (Email:deposit@ccdc.cam.ac.uk). Thermal ellipsoids are drawn at 50% probability level.

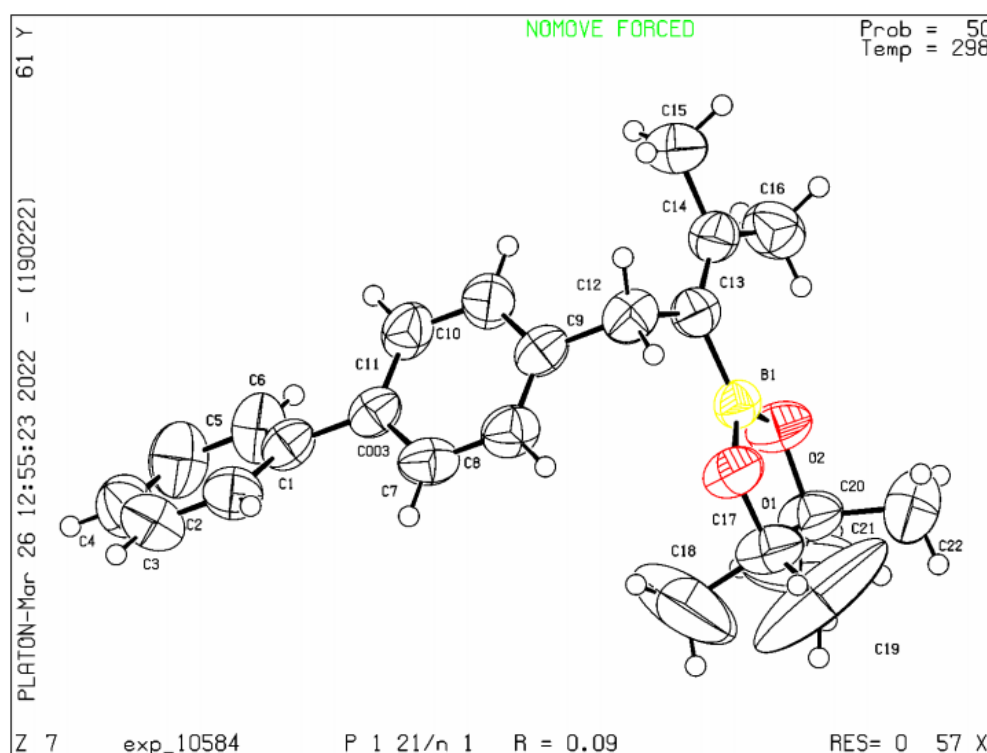

Bond precision: C-C = 0.0061 A                      Wavelength=0.71073

Cell:                    a=11.7662(16)                    b=12.493(2)                    c=14.140(2)

                          alpha=90                      beta=95.415(15)                gamma=90

Temperature:            298 K

|                        | Calculated   | Reported     |
|------------------------|--------------|--------------|
| Volume                 | 2069.2(5)    | 2069.3(5)    |
| Space group            | P 21/n       | P 1 21/n 1   |
| Hall group             | -P 2yn       | -P 2yn       |
| Moiety formula         | C23 H29 B O2 | C23 H29 B O2 |
| Sum formula            | C23 H29 B O2 | C23 H29 B O2 |
| Mr                     | 348.27       | 348.27       |
| Dx, g cm <sup>-3</sup> | 1.118        | 1.118        |
| Z                      | 4            | 4            |
| Mu (mm <sup>-1</sup> ) | 0.068        | 0.068        |
| F000                   | 752.0        | 752.0        |
| F000'                  | 752.30       |              |
| h, k, lmax             | 16, 17, 19   | 16, 16, 19   |
| Nref                   | 5781         | 4864         |
| Tmin, Tmax             | 0.984, 0.988 | 0.593, 1.000 |
| Tmin'                  | 0.983        |              |

Correction method= # Reported T Limits: Tmin=0.593 Tmax=1.000  
AbsCorr = MULTI-SCAN

Data completeness= 0.841                      Theta(max)= 29.524

R(reflections)= 0.0919( 2225)                      wR2(reflections)=  
0.3361( 4864)

S = 1.020                      Npar= 241

## 8. Characterization Data

### 2-(1-([1,1'-biphenyl]-4-yl)-3-methylbut-2-en-2-yl)-4,4,5,5-tetramethyl-1,3,2-dioxaborolane (3a)

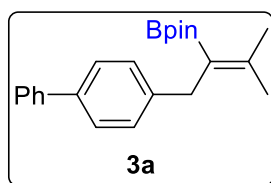

The reaction was performed following the **Condition A**. The residue was purified by flash column chromatograph (PE: EA=100:1) to give the product as a yellow solid (52.2 mg, 75%). m.p. 65-67 °C.  $^1\text{H NMR}$  (500 MHz,  $\text{CDCl}_3$ )  $\delta$  7.57 (d,  $J = 7.2$  Hz, 2H), 7.47 (d,  $J = 8.2$  Hz, 2H), 7.41 (t,  $J = 7.7$  Hz, 2H), 7.32 (d,  $J = 7.3$  Hz, 1H), 7.26 (d,  $J = 7.9$  Hz, 2H), 3.56 (s, 2H), 2.04 (s, 3H), 1.84 (s, 3H), 1.16 (s, 12H).  $^{13}\text{C NMR}$  (126 MHz,  $\text{CDCl}_3$ )  $\delta$  148.1, 141.6, 141.4, 138.3, 129.1, 128.7, 127.0, 126.8, 126.8, 82.9, 36.4, 24.8, 24.7, 21.5.  $^{11}\text{B NMR}$  (160 MHz,  $\text{CDCl}_3$ )  $\delta$  31.40. **HRMS** (ESI,  $m/z$ ) calcd for  $\text{C}_{23}\text{H}_{30}\text{BO}_2$  [ $\text{M}+\text{H}$ ] $^+$ : 349.2333; found: 349.2336.

### 4,4,5,5-tetramethyl-2-(3-methyl-1-(p-tolyl)but-2-en-2-yl)-1,3,2-dioxaborolane (3b)

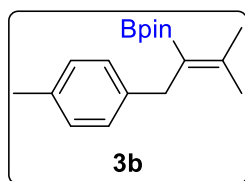

The reaction was performed following the **Condition A**. The residue was purified by flash column chromatograph (PE: EA=100:1) to give the product as a yellow oil liquid (41.2 mg, 72%).  $^1\text{H NMR}$  (500 MHz,  $\text{CDCl}_3$ )  $\delta$  7.09 (d,  $J = 7.8$  Hz, 2H), 7.04 (d,  $J = 7.8$  Hz, 2H), 3.49 (s, 2H), 2.30 (s, 3H), 2.03 (s, 3H), 1.80 (s, 3H), 1.17 (s, 12H).  $^{13}\text{C NMR}$  (126 MHz,  $\text{CDCl}_3$ )  $\delta$  147.8, 139.2, 134.6, 128.7, 128.5, 82.8, 36.2, 24.7, 21.4, 21.0.  $^{11}\text{B NMR}$  (160 MHz,  $\text{CDCl}_3$ )  $\delta$  31.12. **HRMS** (ESI,  $m/z$ ) calcd for  $\text{C}_{18}\text{H}_{28}\text{BO}_2$  [ $\text{M}+\text{H}$ ] $^+$ : 287.2177; found: 349.2336.

### 2-(1-(4-ethylphenyl)-3-methylbut-2-en-2-yl)-4,4,5,5-tetramethyl-1,3,2-dioxaborolane (3c)

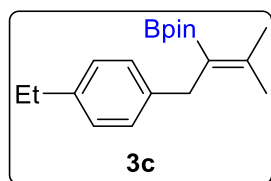

The reaction was performed following the **Condition A**. The residue was purified by flash column chromatograph (PE: EA=100:1) to give the product as a yellow oil liquid (43.2 mg, 72%).  $^1\text{H NMR}$  (500 MHz,  $\text{CDCl}_3$ )  $\delta$  7.11 (d,  $J = 7.8$  Hz, 2H), 7.07 (d,  $J = 8.0$  Hz, 2H), 3.49 (s, 2H), 2.60 (q,  $J = 7.6$  Hz, 2H), 2.02 (s, 3H), 1.81 (s, 3H), 1.20 (t,  $J = 7.6$  Hz, 3H), 1.16 (s, 12H).  $^{13}\text{C NMR}$  (126 MHz,  $\text{CDCl}_3$ )  $\delta$  147.5, 141.2, 139.5, 128.6, 127.5, 82.8, 36.3, 28.5, 24.8, 24.7, 21.3, 15.8.  $^{11}\text{B NMR}$  (160 MHz,  $\text{CDCl}_3$ )  $\delta$  30.99. **HRMS** (ESI,  $m/z$ ) calcd for  $\text{C}_{19}\text{H}_{30}\text{BO}_2$  [ $\text{M}+\text{H}$ ] $^+$ : 301.2333; found: 301.2325.



**2-(1-(4-(tert-butyl)phenyl)-3-methylbut-2-en-2-yl)-4,4,5,5-tetramethyl-1,3,2-dioxaborolane (3d)**

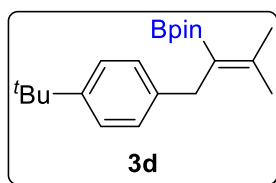

The reaction was performed following the **Condition A**. The residue was purified by flash column chromatograph (PE: EA=100:1) to give the product as a yellow oil liquid (52.5 mg, 80%). **<sup>1</sup>H NMR** (500 MHz, CDCl<sub>3</sub>) δ 7.27 – 7.24 (m, 2H), 7.15 – 7.12 (m, 2H), 3.49 (s, 2H), 2.02 (s, 3H), 1.82 (s, 3H), 1.30 (s, 9H), 1.15 (s, 12H). **<sup>13</sup>C NMR** (126 MHz, CDCl<sub>3</sub>) δ 148.0, 147.1, 139.3, 128.4, 124.9, 82.8, 36.3, 34.3, 31.5, 24.8, 24.7, 21.3. **<sup>11</sup>B NMR** (160 MHz, CDCl<sub>3</sub>) δ 31.05. **HRMS** (ESI, m/z) calcd for C<sub>21</sub>H<sub>33</sub>BNaO<sub>2</sub> [M+Na]<sup>+</sup>: 351.2466; found: 351.2458.

**2-(1-(4-butylphenyl)-3-methylbut-2-en-2-yl)-4,4,5,5-tetramethyl-1,3,2-dioxaborolane (3e)**

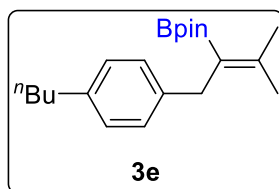

The reaction was performed following the **Condition A**. The residue was purified by flash column chromatograph (PE: EA=100:1) to give the product as a yellow oil liquid (47.6 mg, 68%). **<sup>1</sup>H NMR** (500 MHz, CDCl<sub>3</sub>) δ 7.10 (d, *J* = 8.1 Hz, 2H), 7.04 (d, *J* = 8.1 Hz, 2H), 3.49 (s, 2H), 2.57 – 2.54 (m, 2H), 2.02 (s, 3H), 1.81 (s, 3H), 1.61 – 1.53 (m, 3H), 1.36 – 1.31 (m, 2H), 0.91 (t, *J* = 7.4 Hz, 3H). **<sup>13</sup>C NMR** (126 MHz, CDCl<sub>3</sub>) δ 147.3, 139.7, 139.4, 128.5, 128.1, 82.8, 36.4, 35.2, 33.8, 24.8, 24.7, 22.3, 21.3, 14.0. **<sup>11</sup>B NMR** (160 MHz, CDCl<sub>3</sub>) δ 30.78. **HRMS** (ESI, m/z) calcd for C<sub>21</sub>H<sub>33</sub>BNaO<sub>2</sub> [M+Na]<sup>+</sup>: 351.2466; found: 351.2464.

**2-(1-(4-fluorophenyl)-3-methylbut-2-en-2-yl)-4,4,5,5-tetramethyl-1,3,2-dioxaborolane (3f)**

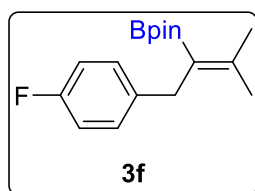

The reaction was performed following the **Condition A**. The residue was purified by flash column chromatograph (PE: EA=100:1) to give the product as a yellow oil liquid (45.2 mg, 78%). **<sup>1</sup>H NMR** (500 MHz, CDCl<sub>3</sub>) δ 7.15 – 7.11 (m, 2H), 6.93 – 6.88 (m, 2H), 3.47 (s, 2H), 2.02 (s, 3H), 1.80 (s, 3H), 1.15 (s, 12H). **<sup>13</sup>C NMR** (126 MHz, CDCl<sub>3</sub>) δ 161.1 (d, *J* = 242.3 Hz), 148.1, 138.0 (d, *J* = 3.1 Hz), 129.9 (d, *J* = 7.7 Hz), 114.6 (d, *J* = 21.0 Hz), 82.9, 35.9, 24.7, 24.7, 21.3. **<sup>19</sup>F NMR** (471 MHz, CDCl<sub>3</sub>) δ -118.68. **<sup>11</sup>B NMR** (160 MHz, CDCl<sub>3</sub>) δ 30.91. **HRMS** (ESI, m/z) calcd for C<sub>17</sub>H<sub>25</sub>BFO<sub>2</sub> [M+H]<sup>+</sup>: 291.1926; found: 291.1921.

**2-(1-(4-chlorophenyl)-3-methylbut-2-en-2-yl)-4,4,5,5-tetramethyl-1,3,2-dioxaborolane (3g)**

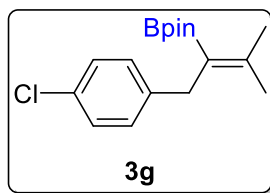

The reaction was performed following the **Condition A**. The residue was purified by flash column chromatograph (PE: EA=100:1) to give the product as a yellow oil liquid (33.6 mg, 55%).  $^1\text{H NMR}$  (500 MHz,  $\text{CDCl}_3$ )  $\delta$  7.21 – 7.16 (m, 2H), 7.13 – 7.08 (m, 2H), 3.47 (s, 2H), 2.03 (s, 3H), 1.79 (s, 3H), 1.16 (s, 12H).  $^{13}\text{C NMR}$  (126 MHz,  $\text{CDCl}_3$ )  $\delta$  148.8, 140.9, 131.0, 123.0, 128.0, 82.9, 36.1, 24.7, 21.4.  $^{11}\text{B NMR}$  (160 MHz,  $\text{CDCl}_3$ )  $\delta$  30.79. **HRMS** (ESI, m/z) calcd for  $\text{C}_{17}\text{H}_{25}\text{BClNaO}_2$   $[\text{M}+\text{Na}]^+$ : 329.1450; found: 329.1443.

#### 4,4,5,5-tetramethyl-2-(3-methyl-1-phenylbut-2-en-2-yl)-1,3,2-dioxaborolane (3h)

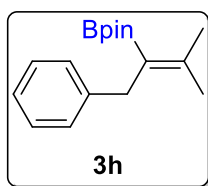

The reaction was performed following the **Condition A**. The residue was purified by flash column chromatograph (PE: EA=100:1) to give the product as a yellow oil liquid (41.9 mg, 77%).  $^1\text{H NMR}$  (500 MHz,  $\text{CDCl}_3$ )  $\delta$  7.25 – 7.18 (m, 4H), 7.15 – 7.10 (m, 1H), 3.53 (s, 2H), 2.04 (s, 3H), 1.82 (s, 3H), 1.16 (s, 12H).  $^{13}\text{C NMR}$  (126 MHz,  $\text{CDCl}_3$ )  $\delta$  147.9, 142.4, 128.7, 128.0, 125.3, 82.9, 36.8, 24.7, 24.7, 21.4.  $^{11}\text{B NMR}$  (160 MHz,  $\text{CDCl}_3$ )  $\delta$  31.01. **HRMS** (ESI, m/z) calcd for  $\text{C}_{17}\text{H}_{26}\text{BO}_2$   $[\text{M}+\text{H}]^+$ : 273.2020; found: 273.2025.

#### 4-(3-methyl-2-(4,4,5,5-tetramethyl-1,3,2-dioxaborolan-2-yl)but-2-en-1-yl)aniline (3i)

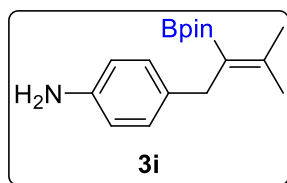

The reaction was performed following the **Condition B**. The residue was purified by flash column chromatograph (PE: EA=30:1) to give the product as a yellow oil liquid (37.3 mg, 65%).  $^1\text{H NMR}$  (500 MHz,  $\text{CDCl}_3$ )  $\delta$  7.02 – 6.97 (m, 2H), 6.62 – 6.58 (m, 2H), 3.64 – 3.24 (m, 4H), 2.02 (s, 3H), 1.81 (s, 3H), 1.18 (s, 12H).  $^{13}\text{C NMR}$  (126 MHz,  $\text{CDCl}_3$ )  $\delta$  147.0, 143.8, 132.5, 129.4, 115.1, 82.8, 35.8, 24.8, 24.7, 21.2.  $^{11}\text{B NMR}$  (160 MHz,  $\text{CDCl}_3$ )  $\delta$  31.12. **HRMS** (ESI, m/z) calcd for  $\text{C}_{17}\text{H}_{27}\text{BNO}_2$   $[\text{M}+\text{H}]^+$ : 288.2129; found: 288.2122.

#### 4-(3-methyl-2-(4,4,5,5-tetramethyl-1,3,2-dioxaborolan-2-yl)but-2-en-1-yl)phenol (3j)

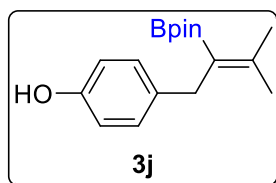

The reaction was performed following the **Condition B**. The residue was purified by flash column chromatograph (PE: EA=30:1) to give the product as a yellow solid (34.6 mg, 60%). m.p. 104-106 °C. **<sup>1</sup>H NMR** (500 MHz, CDCl<sub>3</sub>) δ 7.03 (d, *J* = 8.4 Hz, 2H), 6.68 (d, *J* = 8.5 Hz, 2H), 4.88 (s, 1H), 3.43 (s, 2H), 2.00 (s, 3H), 1.79 (s, 3H), 1.15 (s, 12H). **<sup>13</sup>C NMR** (126 MHz, CDCl<sub>3</sub>) δ 153.4, 147.3, 134.4, 129.7, 114.9, 82.9, 35.8, 24.8, 24.7, 21.2. **<sup>11</sup>B NMR** (160 MHz, CDCl<sub>3</sub>) δ 30.86. **HRMS** (ESI, *m/z*) calcd for C<sub>17</sub>H<sub>26</sub>BO<sub>3</sub> [M+H]<sup>+</sup>: 289.1970; found: 289.1969.

**4,4,5,5-tetramethyl-2-(3-methyl-1-(4-(4,4,5,5-tetramethyl-1,3,2-dioxaborolan-2-yl)phenyl)but-2-en-2-yl)-1,3,2-dioxaborolane (3k)**

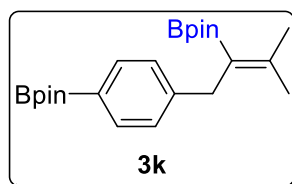

The reaction was performed following the **Condition A**. The residue was purified by flash column chromatograph (PE: EA=100:1) to give the product as a yellow solid (57.4 mg, 72%). m.p. 104-106 °C. **<sup>1</sup>H NMR** (500 MHz, CDCl<sub>3</sub>) δ 7.69 – 7.65 (m, 2H), 7.21 – 7.18 (m, 2H), 3.53 (s, 2H), 2.02 (s, 3H), 1.78 (s, 3H), 1.33 (d, *J* = 2.7 Hz, 12H), 1.16 (s, 12H). **<sup>13</sup>C NMR** (126 MHz, CDCl<sub>3</sub>) δ 148.9, 146.0, 134.6, 128.0, 83.5, 82.9, 36.9, 24.9, 24.7, 24.7, 21.5. **<sup>11</sup>B NMR** (160 MHz, CDCl<sub>3</sub>) δ 31.53. **HRMS** (ESI, *m/z*) calcd for C<sub>23</sub>H<sub>36</sub>B<sub>2</sub>NaO<sub>4</sub> [M+Na]<sup>+</sup>: 421.2692; found: 421.2686.

**4,4,5,5-tetramethyl-2-(3-methyl-1-(4-(trifluoromethyl)phenyl)but-2-en-2-yl)-1,3,2-dioxaborolane (3l)**

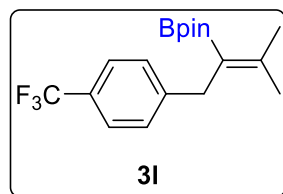

The reaction was performed following the **Condition A**. The residue was purified by flash column chromatograph (PE: EA=100:1) to give the product as a yellow oil liquid (35.4mg, 52%). **<sup>1</sup>H NMR** (500 MHz, CDCl<sub>3</sub>) δ 7.47 (d, *J* = 8.0 Hz, 2H), 7.32 – 7.27 (m, 2H), 3.56 (s, 2H), 2.04 (s, 3H), 1.80 (s, 3H), 1.15 (s, 12H). **<sup>13</sup>C NMR** (126 MHz, CDCl<sub>3</sub>) δ 149.6, 146.7, 128.8, 127.7 (q, *J* = 32.0 Hz), 124.9 (q, *J* = 3.7 Hz), 124.5 (d, *J* = 271.7 Hz), 83.0, 36.6, 24.8, 24.7, 21.6. **<sup>19</sup>F NMR** (471 MHz, CDCl<sub>3</sub>) δ -62.19. **<sup>11</sup>B NMR** (160 MHz, CDCl<sub>3</sub>) δ 30.88. **HRMS** (ESI, *m/z*) calcd for C<sub>18</sub>H<sub>25</sub>BF<sub>3</sub>O<sub>3</sub> [M+H]<sup>+</sup>: 341.1894; found: 341.1904.

**4-(3-methyl-2-(4,4,5,5-tetramethyl-1,3,2-dioxaborolan-2-yl)but-2-en-1-yl)phenyl 4-methylbenzenesulfonate (3m)**

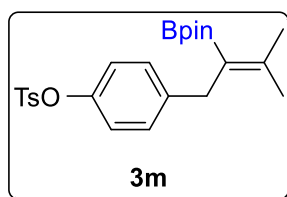

The reaction was performed following the **Condition A**. The residue was purified by flash column chromatograph (PE: EA=100:1) to give the product as a yellow solid (50.4 mg, 57%). m.p. 68-70 °C. **<sup>1</sup>H NMR** (500 MHz, CDCl<sub>3</sub>) δ 7.72 – 7.64 (m, 2H), 7.28 (d, *J* = 8.0 Hz, 2H), 7.09 – 7.04 (m, 2H), 6.84 – 6.78 (m, 2H), 3.44 (s, 2H), 2.43 (s, 3H), 2.00 (s, 3H), 1.76 (s, 3H), 1.11 (s, 12H). **<sup>13</sup>C NMR** (126 MHz, CDCl<sub>3</sub>) δ 148.62, 147.47, 145.09, 141.49, 132.64, 129.67, 129.65, 128.53, 121.77, 82.91, 36.14, 24.70, 24.67, 21.70, 21.38. **<sup>11</sup>B NMR** (160 MHz, CDCl<sub>3</sub>) δ 31.06. **HRMS** (ESI, *m/z*) calcd for C<sub>24</sub>H<sub>32</sub>BO<sub>5</sub>S [M+H]<sup>+</sup>: 443.2058; found: 443.2053.

**1-(4-(3-methyl-2-(4,4,5,5-tetramethyl-1,3,2-dioxaborolan-2-yl)but-2-en-1-yl)phenyl)ethan-1-one (3n)**

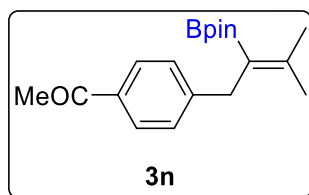

The reaction was performed following the **Condition A**. The residue was purified by flash column chromatograph (PE: EA=100:1) to give the product as a yellow solid (13.8 mg, 22%). m.p. 65-67 °C. **<sup>1</sup>H NMR** (500 MHz, CDCl<sub>3</sub>) δ 7.85 – 7.82 (m, 2H), 7.27 (d, *J* = 7.9 Hz, 2H), 3.56 (s, 2H), 2.56 (s, 3H), 2.04 (s, 3H), 1.79 (s, 3H), 1.15 (s, 12H). **<sup>13</sup>C NMR** (126 MHz, CDCl<sub>3</sub>) δ 198.0, 149.6, 148.6, 134.7, 128.7, 128.3, 83.0, 36.8, 26.5, 24.7, 24.7, 21.6. **<sup>11</sup>B NMR** (160 MHz, CDCl<sub>3</sub>) δ 30.96. **HRMS** (ESI, *m/z*) calcd for C<sub>19</sub>H<sub>28</sub>BO<sub>3</sub> [M+H]<sup>+</sup>: 315.2126; found: 315.2133.

**4,4,5,5-tetramethyl-2-(3-methyl-1-(4-(trifluoromethoxy)phenyl)but-2-en-2-yl)-1,3,2-dioxaborolane (3o)**

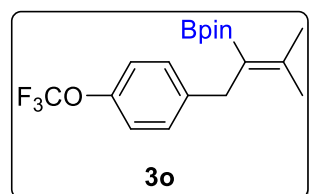

The reaction was performed following the **Condition A**. The residue was purified by flash column chromatograph (PE: EA=50:1) to give the product as a yellow oil liquid (30.6 mg, 43%). **<sup>1</sup>H NMR** (500 MHz, CDCl<sub>3</sub>) δ 7.21 – 7.16 (m, 2H), 7.09 – 7.04 (m, 2H), 3.50 (s, 2H), 2.03 (s, 3H), 1.80 (s, 3H), 1.14 (s, 12H). **<sup>13</sup>C NMR** (126 MHz, CDCl<sub>3</sub>) δ 148.5, 147.1, 141.3, 129.9, 120.6, 120.6 (q, *J* = 257.0 Hz), 83.0, 36.1, 24.7, 24.6, 21.4. **<sup>19</sup>F NMR** (471 MHz, CDCl<sub>3</sub>) δ -58.00. **<sup>11</sup>B NMR** (160 MHz, CDCl<sub>3</sub>) δ 30.88. **HRMS** (ESI, *m/z*) calcd for C<sub>18</sub>H<sub>25</sub>BF<sub>3</sub>O<sub>3</sub> [M+H]<sup>+</sup>: 357.1843; found: 357.1845.

**2-(1-(4-methoxyphenyl)-3-methylbut-2-en-2-yl)-4,4,5,5-tetramethyl-1,3,2-dioxaborolane (3p)**

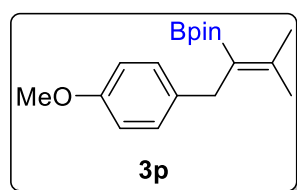

The reaction was performed following the **Condition A**. The residue was purified by flash column chromatograph (PE: EA=30:1) to give the product as a yellow oil liquid (45.9 mg, 76%). **<sup>1</sup>H NMR** (500

MHz, CDCl<sub>3</sub>) δ 7.12 – 7.08 (m, 2H), 6.79 – 6.76 (m, 2H), 3.77 (s, 3H), 3.45 (s, 2H), 2.01 (s, 3H), 1.80 (s, 3H), 1.15 (s, 12H). <sup>13</sup>C NMR (126 MHz, CDCl<sub>3</sub>) δ 157.5, 147.4, 134.5, 129.5, 113.5, 82.8, 55.3, 35.8, 24.7, 24.7, 21.3. <sup>11</sup>B NMR (160 MHz, CDCl<sub>3</sub>) δ 31.41. HRMS (ESI, m/z) calcd for C<sub>18</sub>H<sub>28</sub>BO<sub>3</sub> [M+H]<sup>+</sup>: 303.2126; found: 303.2131.

**N,N-dimethyl-4-(3-methyl-2-(4,4,5,5-tetramethyl-1,3,2-dioxaborolan-2-yl)but-2-en-1-yl)aniline (3q)**

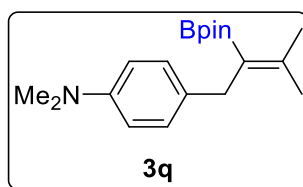

The reaction was performed following the **Condition A**. The residue was purified by flash column chromatograph (PE: EA=30:1) to give the product as a yellow oil liquid (41.0mg, 65%). <sup>1</sup>H NMR (500 MHz, CDCl<sub>3</sub>) δ 7.09 – 7.04 (m, 2H), 6.69 – 6.65 (m, 2H), 3.42 (s, 2H), 2.88 (s, 6H), 2.01 – 1.98 (m, 3H), 1.80 (s, 3H), 1.16 (s, 12H). <sup>13</sup>C NMR (126 MHz, CDCl<sub>3</sub>) δ 148.9, 147.0, 130.9, 129.2, 113.2, 82.8, 41.2, 35.7, 24.8, 21.3. <sup>11</sup>B NMR (160 MHz, CDCl<sub>3</sub>) δ 31.37. HRMS (ESI, m/z) calcd for C<sub>19</sub>H<sub>31</sub>BNO<sub>2</sub> [M+H]<sup>+</sup>: 316.2442; found: 316.2440.

**2-(1-(3-fluorophenyl)-3-methylbut-2-en-2-yl)-4,4,5,5-tetramethyl-1,3,2-dioxaborolane (3r)**

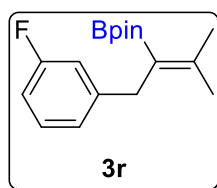

The reaction was performed following the **Condition A**. The residue was purified by flash column chromatograph (PE: EA=100:1) to give the product as a yellow oil liquid (27.8 mg, 48%). <sup>1</sup>H NMR (500 MHz, CDCl<sub>3</sub>) δ 7.17 (td, *J* = 7.9, 6.1 Hz, 1H), 6.96 (d, *J* = 7.6 Hz, 1H), 6.90 (dt, *J* = 10.2, 2.1 Hz, 1H), 6.81 (td, *J* = 8.5, 2.7 Hz, 1H), 3.50 (s, 2H), 2.03 (s, 3H), 1.80 (s, 3H), 1.17 (s, 12H). <sup>13</sup>C NMR (126 MHz, CDCl<sub>3</sub>) δ 162.9 (d, *J* = 244.4 Hz), 149.1, 145.2 (d, *J* = 7.6 Hz), 129.3 (d, *J* = 7.6 Hz), 124.2 (d, *J* = 2.5 Hz), 115.4 (d, *J* = 21.4 Hz), 112.1 (d, *J* = 21.4 Hz), 82.9, 36.5, 36.5, 24.69, 24.68, 21.5. <sup>19</sup>F NMR (471 MHz, CDCl<sub>3</sub>) δ -114.51. <sup>11</sup>B NMR (160 MHz, CDCl<sub>3</sub>) δ 30.93. HRMS (ESI, m/z) calcd for C<sub>17</sub>H<sub>24</sub>BFNaO<sub>2</sub> [M+Na]<sup>+</sup>: 313.1746; found: 313.1748.

**2-(1-(3-bromophenyl)-3-methylbut-2-en-2-yl)-4,4,5,5-tetramethyl-1,3,2-dioxaborolane (3s)**

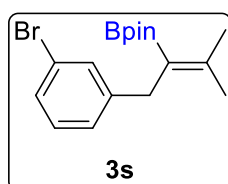

The reaction was performed following the **Condition A**. The residue was purified by flash column chromatograph (PE: EA=100:1) to give the product as a yellow oil liquid (49.0 mg, 70%). <sup>1</sup>H NMR (500 MHz, CDCl<sub>3</sub>) δ 7.36 (d, *J* = 1.9 Hz, 1H), 7.25 (dt, *J* = 6.9, 1.9 Hz, 1H), 7.12 – 7.06 (m, 2H), 3.48 (s, 2H), 2.03 (s, 3H), 1.80 (s, 3H), 1.17 (s, 12H). <sup>13</sup>C NMR (126 MHz, CDCl<sub>3</sub>) δ 149.1, 145.0, 131.8, 129.6,

128.4, 127.3, 122.2, 83.0, 36.5, 24.7, 21.5.  $^{11}\text{B}$  NMR (160 MHz,  $\text{CDCl}_3$ )  $\delta$  30.84. HRMS (ESI,  $m/z$ ) calcd for  $\text{C}_{17}\text{H}_{24}\text{BBrNaO}_2$   $[\text{M}+\text{Na}]^+$ : 373.0945; found: 373.0946.

### 2-(1-(3-methoxyphenyl)-3-methylbut-2-en-2-yl)-4,4,5,5-tetramethyl-1,3,2-dioxaborolane (3t)

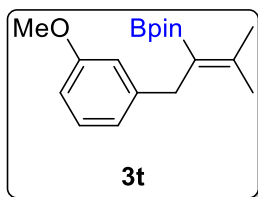

The reaction was performed following the **Condition A**. The residue was purified by flash column chromatograph (PE: EA=30:1) to give the product as a yellow oil liquid (50.2 mg, 83%).  $^1\text{H}$  NMR (500 MHz,  $\text{CDCl}_3$ )  $\delta$  7.14 (t,  $J = 7.8$  Hz, 1H), 6.81 – 6.76 (m, 2H), 6.68 (dd,  $J = 8.0, 2.7$  Hz, 1H), 3.78 (s, 3H), 3.50 (s, 2H), 2.03 (s, 3H), 1.81 (s, 3H), 1.17 (s, 12H).  $^{13}\text{C}$  NMR (126 MHz,  $\text{CDCl}_3$ )  $\delta$  159.5, 148.4, 144.1, 128.9, 121.2, 114.3, 110.8, 82.9, 55.1, 36.8, 24.7, 21.5.  $^{11}\text{B}$  NMR (160 MHz,  $\text{CDCl}_3$ )  $\delta$  31.08. HRMS (ESI,  $m/z$ ) calcd for  $\text{C}_{18}\text{H}_{28}\text{BO}_3$   $[\text{M}+\text{H}]^+$ : 303.2126; found: 303.2124.

### 3-(3-methyl-2-(4,4,5,5-tetramethyl-1,3,2-dioxaborolan-2-yl)but-2-en-1-yl)benzonitrile (3u)

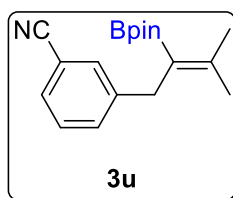

The reaction was performed following the **Condition A**. The residue was purified by flash column chromatograph (PE: EA=50:1) to give the product as a yellow oil liquid (32.7 mg, 55%).  $^1\text{H}$  NMR (500 MHz,  $\text{CDCl}_3$ )  $\delta$  7.48 (d,  $J = 1.7$  Hz, 1H), 7.43 – 7.39 (m, 2H), 7.31 (t,  $J = 7.7$  Hz, 1H), 3.52 (s, 2H), 2.05 (s, 3H), 1.80 (s, 3H), 1.15 (s, 12H).  $^{13}\text{C}$  NMR (126 MHz,  $\text{CDCl}_3$ )  $\delta$  150.3, 144.0, 133.29, 132.25, 129.2, 128.7, 119.3, 111.9, 83.0, 36.3, 24.7, 24.7, 21.7.  $^{11}\text{B}$  NMR (160 MHz,  $\text{CDCl}_3$ )  $\delta$  30.91. HRMS (ESI,  $m/z$ ) calcd for  $\text{C}_{18}\text{H}_{25}\text{BNO}_2$   $[\text{M}+\text{H}]^+$ : 298.1973; found: 298.1980.

### 2-(1-(2-fluorophenyl)-3-methylbut-2-en-2-yl)-4,4,5,5-tetramethyl-1,3,2-dioxaborolane (3v)

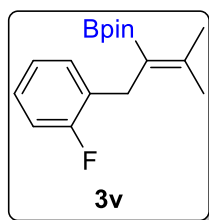

The reaction was performed following the **Condition A**. The residue was purified by flash column chromatograph (PE: EA=100:1) to give the product as a yellow oil liquid (34.2 mg, 59%).  $^1\text{H}$  NMR (500 MHz,  $\text{CDCl}_3$ )  $\delta$  7.16 (td,  $J = 7.6, 1.8$  Hz, 1H), 7.10 (tdd,  $J = 7.4, 5.2, 1.8$  Hz, 1H), 7.00 (td,  $J = 7.5, 1.3$  Hz, 1H), 6.96 (ddd,  $J = 9.5, 8.1, 1.3$  Hz, 1H), 3.52 (s, 2H), 2.03 (s, 3H), 1.77 (s, 3H), 1.17 (s, 12H).  $^{13}\text{C}$  NMR (126 MHz,  $\text{CDCl}_3$ )  $\delta$  161.1 (d,  $J = 244.7$  Hz), 149.1, 130.4 (d,  $J = 4.9$  Hz), 129.0 (d,  $J = 15.7$  Hz), 126.9 (d,  $J = 8.1$  Hz), 123.6 (d,  $J = 3.5$  Hz), 114.8 (d,  $J = 22.3$  Hz), 82.9, 29.3 (d,  $J = 3.0$  Hz), 24.72, 24.70, 21.3.  $^{19}\text{F}$  NMR (471 MHz,  $\text{CDCl}_3$ )  $\delta$  -117.23.  $^{11}\text{B}$  NMR (160 MHz,  $\text{CDCl}_3$ )  $\delta$  30.93. HRMS (ESI,  $m/z$ ) calcd for  $\text{C}_{17}\text{H}_{24}\text{BFNaO}_2$   $[\text{M}+\text{Na}]^+$ : 313.1746; found: 313.1746.

**2-(1-(2-methoxyphenyl)-3-methylbut-2-en-2-yl)-4,4,5,5-tetramethyl-1,3,2-dioxaborolane (3w)**

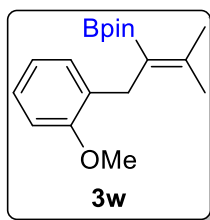

The reaction was performed following the **Condition A**. The residue was purified by flash column chromatograph (PE: EA=30:1) to give the product as a yellow solid (48.3 mg, 87%). m.p. 48-50 °C. **<sup>1</sup>H NMR** (500 MHz, CDCl<sub>3</sub>) δ 7.15 – 7.09 (m, 2H), 6.87 – 6.79 (m, 2H), 3.83 (s, 3H), 3.49 (s, 2H), 2.04 (s, 3H), 1.75 (s, 3H), 1.17 (s, 12H). **<sup>13</sup>C NMR** (126 MHz, CDCl<sub>3</sub>) δ 157.5, 148.1, 130.5, 129.2, 126.4, 120.2, 109.9, 82.8, 55.3, 30.3, 24.8, 24.7, 21.2. **<sup>11</sup>B NMR** (160 MHz, CDCl<sub>3</sub>) δ 31.09. **HRMS** (ESI, m/z) calcd for C<sub>18</sub>H<sub>25</sub>BNO<sub>2</sub> [M+H]<sup>+</sup>: 303.2126; found: 303.2130.

**2-(1-(2-chlorophenyl)-3-methylbut-2-en-2-yl)-4,4,5,5-tetramethyl-1,3,2-dioxaborolane (3x)**

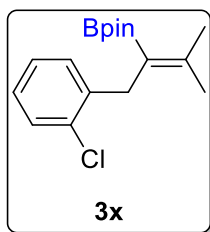

The reaction was performed following the **Condition A**. The residue was purified by flash column chromatograph (PE: EA=100:1) to give the product as a yellow solid (27.6 mg, 45%). m.p. 75-77 °C. **<sup>1</sup>H NMR** (500 MHz, CDCl<sub>3</sub>) δ 7.32 – 7.29 (m, 1H), 7.16 – 7.11 (m, 2H), 7.08 (ddd, *J* = 7.5, 6.5, 2.7 Hz, 1H), 3.59 (s, 2H), 2.06 (s, 3H), 1.72 (s, 3H), 1.15 (s, 12H). **<sup>13</sup>C NMR** (126 MHz, CDCl<sub>3</sub>) δ 149.6, 139.6, 134.3, 129.7, 129.0, 126.7, 126.4, 82.9, 34.0, 24.72, 24.66, 21.4. **<sup>11</sup>B NMR** (160 MHz, CDCl<sub>3</sub>) δ 30.98. **HRMS** (ESI, m/z) calcd for C<sub>17</sub>H<sub>25</sub>BClO<sub>2</sub> [M+H]<sup>+</sup>: 307.1631; found: 307.1632.

**methyl 2-(3-methyl-2-(4,4,5,5-tetramethyl-1,3,2-dioxaborolan-2-yl)but-2-en-1-yl)benzoate (3y)**

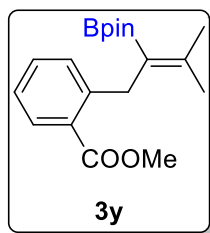

The reaction was performed following the **Condition A**. The residue was purified by flash column chromatograph (PE: EA=100:1) to give the product as a yellow oil liquid (13.2 mg, 20%). **<sup>1</sup>H NMR** (500 MHz, CDCl<sub>3</sub>) δ 7.78 (dd, *J* = 7.8, 1.4 Hz, 1H), 7.35 (t, *J* = 7.6 Hz, 1H), 7.22 (d, *J* = 7.8 Hz, 1H), 7.18 (t, *J* = 7.5 Hz, 1H), 3.89 (d, *J* = 0.9 Hz, 3H), 3.86 (s, 2H), 2.06 – 2.03 (m, 3H), 1.73 (s, 3H), 1.09 (d, *J* = 0.9 Hz, 12H). **<sup>13</sup>C NMR** (126 MHz, CDCl<sub>3</sub>) δ 168.7, 148.6, 143.6, 131.5, 130.4, 130.0, 129.6, 125.2, 82.8, 51.8, 34.3, 24.7, 24.6, 21.3. **<sup>11</sup>B NMR** (160 MHz, CDCl<sub>3</sub>) δ 30.99. **HRMS** (ESI, m/z) calcd for C<sub>19</sub>H<sub>28</sub>BO<sub>4</sub> [M+H]<sup>+</sup>: 331.2075; found: 331.2078.

**2-(1-(3,4-dichlorophenyl)-3-methylbut-2-en-2-yl)-4,4,5,5-tetramethyl-1,3,2-dioxaborolane (3z)**

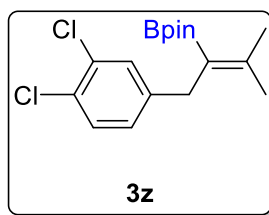

The reaction was performed following the **Condition A**. The residue was purified by flash column chromatograph (PE: EA=100:1) to give the product as a yellow solid (36.7 mg, 54%). m.p. 70-72 °C.  $^1\text{H NMR}$  (500 MHz,  $\text{CDCl}_3$ )  $\delta$  7.30 – 7.26 (m, 2H), 7.01 (ddd,  $J = 8.1, 2.0, 0.9$  Hz, 1H), 3.45 (s, 2H), 2.03 (s, 3H), 1.79 (s, 3H), 1.18 (d,  $J = 1.1$  Hz, 12H).  $^{13}\text{C NMR}$  (126 MHz,  $\text{CDCl}_3$ )  $\delta$  149.9, 142.9, 131.8, 130.6, 129.8, 129.1, 128.1, 83.0, 35.9, 24.74, 24.69, 21.6.  $^{11}\text{B NMR}$  (160 MHz,  $\text{CDCl}_3$ )  $\delta$  30.84. **HRMS** (ESI,  $m/z$ ) calcd for  $\text{C}_{17}\text{H}_{24}\text{BCl}_2\text{O}_2$   $[\text{M}+\text{H}]^+$ : 341.1241; found: 341.1244.

**2-(1-(5-chloro-2-methoxyphenyl)-3-methylbut-2-en-2-yl)-4,4,5,5-tetramethyl-1,3,2-dioxaborolane (3aa)**

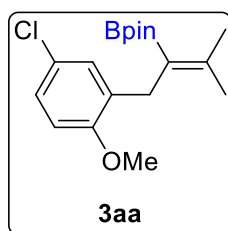

The reaction was performed following the **Condition A**. The residue was purified by flash column chromatograph (PE: EA=100:1) to give the product as a yellow oil liquid (52.4 mg, 78%).  $^1\text{H NMR}$  (500 MHz,  $\text{CDCl}_3$ )  $\delta$  7.10 – 7.04 (m, 2H), 6.70 (d,  $J = 8.5$  Hz, 1H), 3.79 (s, 3H), 3.43 (s, 2H), 2.04 (s, 3H), 1.74 (s, 3H), 1.18 (s, 12H).  $^{13}\text{C NMR}$  (126 MHz,  $\text{CDCl}_3$ )  $\delta$  156.1, 149.2, 132.6, 129.3, 125.9, 125.1, 111.0, 82.9, 55.6, 30.4, 24.8, 24.8, 21.4.  $^{11}\text{B NMR}$  (160 MHz,  $\text{CDCl}_3$ )  $\delta$  30.79. **HRMS** (ESI,  $m/z$ ) calcd for  $\text{C}_{18}\text{H}_{27}\text{BClO}_3$   $[\text{M}+\text{H}]^+$ : 337.1736; found: 337.1731.

**4,4,5,5-tetramethyl-2-(3-methyl-1-(thiophen-2-yl)but-2-en-2-yl)-1,3,2-dioxaborolane (3ab)**

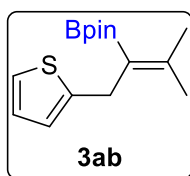

The reaction was performed following the **Condition A**. The residue was purified by flash column chromatograph (PE: EA=100:1) to give the product as a yellow oil liquid (23.2 mg, 65%).  $^1\text{H NMR}$  (500 MHz,  $\text{CDCl}_3$ )  $\delta$  7.05 (dd,  $J = 5.1, 1.3$  Hz, 1H), 6.87 (dd,  $J = 5.1, 3.4$  Hz, 1H), 6.76 (dd,  $J = 3.1, 1.4$  Hz, 1H), 3.67 (s, 2H), 2.03 (s, 3H), 1.83 (s, 3H), 1.21 (s, 12H).  $^{13}\text{C NMR}$  (126 MHz,  $\text{CDCl}_3$ )  $\delta$  149.6, 145.9, 126.4, 123.9, 122.7, 83.0, 31.1, 24.8, 24.6, 21.4.  $^{11}\text{B NMR}$  (160 MHz,  $\text{CDCl}_3$ )  $\delta$  30.84. **HRMS** (ESI,  $m/z$ ) calcd for  $\text{C}_{15}\text{H}_{24}\text{BO}_2\text{S}$   $[\text{M}+\text{H}]^+$ : 279.1585; found: 279.1582.

**4,4,5,5-tetramethyl-2-(3-methyl-1-(naphthalen-1-yl)but-2-en-2-yl)-1,3,2-dioxaborolane (3ac)**



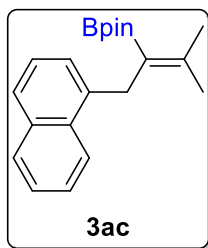

The reaction was performed following the **Condition A**. The residue was purified by flash column chromatograph (PE: EA=100:1) to give the product as a yellow solid (37.4 mg, 58%). m.p. 80-82 °C.  $^1\text{H NMR}$  (500 MHz,  $\text{CDCl}_3$ )  $\delta$  8.15 (d,  $J = 8.4$  Hz, 1H), 7.87 – 7.83 (m, 1H), 7.69 (d,  $J = 8.2$  Hz, 1H), 7.53 (ddt,  $J = 8.3, 6.9, 1.2$  Hz, 1H), 7.48 (ddt,  $J = 7.9, 6.8, 1.1$  Hz, 1H), 7.38 (t,  $J = 7.7$  Hz, 1H), 7.29 (dt,  $J = 7.0, 1.1$  Hz, 1H), 3.98 (s, 2H), 2.13 (s, 3H), 1.79 (s, 3H), 1.08 (d,  $J = 1.0$  Hz, 12H).  $^{13}\text{C NMR}$  (126 MHz,  $\text{CDCl}_3$ )  $\delta$  148.4, 137.7, 133.7, 132.5, 128.5, 126.1, 125.6, 125.5, 125.2, 125.1, 124.0, 82.9, 33.4, 24.8, 24.6, 21.3.  $^{11}\text{B NMR}$  (160 MHz,  $\text{CDCl}_3$ )  $\delta$  31.29. **HRMS** (ESI,  $m/z$ ) calcd for  $\text{C}_{21}\text{H}_{28}\text{BO}_2$  [ $\text{M}+\text{H}$ ] $^+$ : 323.2177; found: 323.2173.

**2-(1-(9H-fluoren-2-yl)-3-methylbut-2-en-2-yl)-4,4,5,5-tetramethyl-1,3,2-dioxaborolane (3ad)**

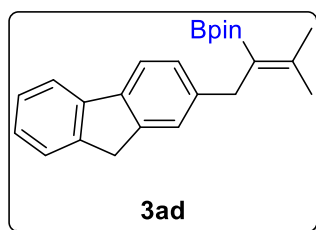

The reaction was performed following the **Condition A**. The residue was purified by flash column chromatograph (PE: EA=100:1) to give the product as a yellow solid (51.2 mg, 71%). m.p. 98-100 °C.  $^1\text{H NMR}$  (500 MHz,  $\text{CDCl}_3$ )  $\delta$  7.76 (d,  $J = 7.5$  Hz, 1H), 7.67 (d,  $J = 7.7$  Hz, 1H), 7.53 (dt,  $J = 7.5, 0.9$  Hz, 1H), 7.37 (ddd,  $J = 15.0, 7.8, 1.3$  Hz, 2H), 7.30 – 7.22 (m, 2H), 3.86 (s, 2H), 3.63 (s, 2H), 2.08 (s, 3H), 1.88 (s, 3H), 1.16 (s, 12H).  $^{13}\text{C NMR}$  (126 MHz,  $\text{CDCl}_3$ )  $\delta$  147., 143.3, 142.0, 141.3, 139.1, 127.4, 126.6, 126.1, 125.3, 125.0, 119.6, 119.4, 82.9, 37.0, 36.9, 24.9, 24.8, 21.4.  $^{11}\text{B NMR}$  (160 MHz,  $\text{CDCl}_3$ )  $\delta$  31.30. **HRMS** (ESI,  $m/z$ ) calcd for  $\text{C}_{24}\text{H}_{30}\text{BO}_2$  [ $\text{M}+\text{H}$ ] $^+$ : 361.2333; found: 361.2329.

**2-(1-(2,3-dihydrobenzo[b][1,4]dioxin-6-yl)-3-methylbut-2-en-2-yl)-4,4,5,5-tetramethyl-1,3,2-dioxaborolane (3ae)**

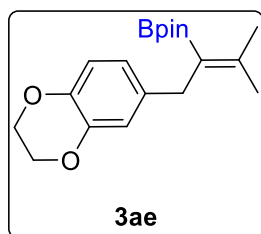

The reaction was performed following the **Condition A**. The residue was purified by flash column chromatograph (PE: EA=100:1) to give the product as a yellow oil liquid (41.6 mg, 63%).  $^1\text{H NMR}$  (500 MHz,  $\text{CDCl}_3$ )  $\delta$  6.73 – 6.69 (m, 2H), 6.66 (dd,  $J = 8.2, 2.1$  Hz, 1H), 4.22 – 4.19 (m, 4H), 3.40 (s, 2H), 2.00 (s, 3H), 1.79 (s, 3H), 1.18 (s, 12H).  $^{13}\text{C NMR}$  (126 MHz,  $\text{CDCl}_3$ )  $\delta$  148.0, 143.1, 141.3, 135.8,

121.6, 117.3, 116.6, 82.8, 64.4, 64.4, 35.9, 24.8, 24.7, 21.4.  $^{11}\text{B}$  NMR (160 MHz,  $\text{CDCl}_3$ )  $\delta$  31.06. **HRMS** (ESI,  $m/z$ ) calcd for  $\text{C}_{19}\text{H}_{28}\text{BO}_4$   $[\text{M}+\text{H}]^+$ : 331.2075; found: 331.2079.

**2-(3-ethyl-1-phenylpent-2-en-2-yl)-4,4,5,5-tetramethyl-1,3,2-dioxaborolane (3af)**

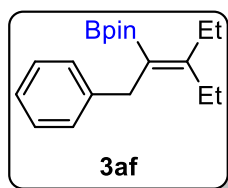

The reaction was performed following the **Condition A**. The residue was purified by flash column chromatograph (PE: EA=100:1) to give the product as a yellow oil liquid (31.2 mg, 52%).  $^1\text{H}$  NMR (500 MHz,  $\text{CDCl}_3$ )  $\delta$  7.26 – 7.17 (m, 4H), 7.15 – 7.10 (m, 1H), 3.52 (s, 2H), 2.37 (q,  $J$  = 7.5 Hz, 2H), 2.19 (q,  $J$  = 7.6 Hz, 2H), 1.10 (s, 12H), 1.05 (t,  $J$  = 7.5 Hz, 3H), 0.99 (t,  $J$  = 7.6 Hz, 3H).  $^{13}\text{C}$  NMR (126 MHz,  $\text{CDCl}_3$ )  $\delta$  158.3, 142.4, 128.7, 128.0, 125.3, 82.7, 36.2, 28.5, 24.6, 14.8, 13.2.  $^{11}\text{B}$  NMR (160 MHz,  $\text{CDCl}_3$ )  $\delta$  31.12. **HRMS** (ESI,  $m/z$ ) calcd for  $\text{C}_{19}\text{H}_{30}\text{BO}_2$   $[\text{M}+\text{H}]^+$ : 301.2333; found: 301.2328.

**2-(1-cyclohexylidene-2-phenylethyl)-4,4,5,5-tetramethyl-1,3,2-dioxaborolane (3ag)**

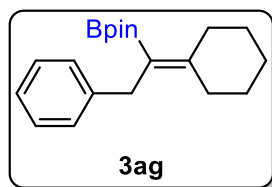

The reaction was performed following the **Condition A**. The residue was purified by flash column chromatograph (PE: EA=100:1) to give the product as a yellow oil liquid (37.5 mg, 60%).  $^1\text{H}$  NMR (500 MHz,  $\text{CDCl}_3$ )  $\delta$  7.25 – 7.17 (m, 4H), 7.14 – 7.09 (m, 1H), 3.54 (s, 2H), 2.50 (t,  $J$  = 5.7 Hz, 2H), 2.30 (dd,  $J$  = 7.0, 5.0 Hz, 2H), 1.64 – 1.52 (m, 6H), 1.14 (s, 12H).  $^{13}\text{C}$  NMR (126 MHz,  $\text{CDCl}_3$ )  $\delta$  155.1, 142.6, 128.7, 128.0, 125.3, 82.8, 35.8, 35.3, 31.3, 29.0, 28.2, 27.0, 24.7.  $^{11}\text{B}$  NMR (160 MHz,  $\text{CDCl}_3$ )  $\delta$  31.32. **HRMS** (ESI,  $m/z$ ) calcd for  $\text{C}_{20}\text{H}_{30}\text{BO}_2$   $[\text{M}+\text{H}]^+$ : 313.2333; found: 313.2335.

**2-(3,4-dimethyl-1-phenylpent-2-en-2-yl)-4,4,5,5-tetramethyl-1,3,2-dioxaborolane (3ah)**

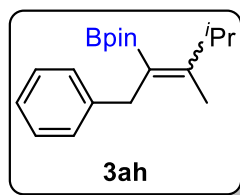

The reaction was performed following the **Condition B**. The residue was purified by flash column chromatograph (PE: EA=100:1) to give the product as a yellow oil liquid (37.5 mg, 68%).  $^1\text{H}$  NMR (500 MHz,  $\text{CDCl}_3$ )  $\delta$  7.25 – 7.16 (m, 6H), 7.15 – 7.07 (m, 1H), 3.56 (s, 1H), 3.50 (s, 2H), 3.18 (m,  $J$  = 6.9 Hz, 1H), 3.05 (m,  $J$  = 6.8 Hz, 0.5H), 1.89 (s, 2H), 1.66 (s, 3H), 1.12 (s, 6H), 1.12 (s, 12H), 1.02 (d,  $J$  = 6.8 Hz, 6H), 0.96 (d,  $J$  = 6.9 Hz, 3H).  $^{13}\text{C}$  NMR (126 MHz,  $\text{CDCl}_3$ )  $\delta$  155.7, 142.2, 128.7, 128.7, 128.0, 125.3, 125.3, 82.9, 82.8, 36.5, 35.6, 34.8, 30.3, 24.7, 24.6, 21.4, 20.5, 16.3, 12.7.  $^{11}\text{B}$  NMR (160 MHz,  $\text{CDCl}_3$ )  $\delta$  31.21. **HRMS** (ESI,  $m/z$ ) calcd for  $\text{C}_{19}\text{H}_{30}\text{BO}_2$   $[\text{M}+\text{H}]^+$ : 301.2333; found: 301.2335.

#### 4,4,5,5-tetramethyl-2-(1-phenylpent-2-en-2-yl)-1,3,2-dioxaborolane (3ai)

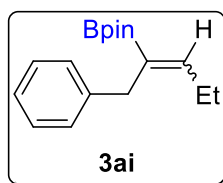

The reaction was performed following the **Condition B**. The residue was purified by flash column chromatograph (PE: EA=100:1) to give the product as a yellow oil liquid (34.8 mg, 64%).  $^1\text{H NMR}$  (500 MHz,  $\text{CDCl}_3$ )  $\delta$  7.34 (dd,  $J = 6.9, 3.2$  Hz, 1.5H), 7.22 (dq,  $J = 8.6, 6.9, 5.8$  Hz, 7H), 7.16 – 7.11 (m, 1.6H), 6.42 (t,  $J = 7.0$  Hz, 0.7H), 6.05 (t,  $J = 7.5$  Hz, 1H), 3.51 (s, 1.4H), 3.43 (s, 2H), 2.35 (q,  $J = 7.7$  Hz, 2H), 2.23 (q,  $J = 7.4$  Hz, 1.4H), 1.20 (s, 8H), 1.16 (s, 12H), 1.00 (dt,  $J = 10.7, 7.6$  Hz, 5H).  $^{13}\text{C NMR}$  (126 MHz,  $\text{CDCl}_3$ )  $\delta$  148.7, 148.5, 141.9, 134.0, 129.0, 128.6, 128.04, 128.00, 125.5, 125.3, 83.2, 82.9, 42.8, 34.2, 24.80, 24.78, 24.7, 24.6, 22.9, 22.2, 14.6, 13.5.  $^{11}\text{B NMR}$  (160 MHz,  $\text{CDCl}_3$ )  $\delta$  30.77. **HRMS** (ESI,  $m/z$ ) calcd for  $\text{C}_{17}\text{H}_{30}\text{BO}_2$   $[\text{M}+\text{H}]^+$ : 273.2020; found: 273.2026.

#### 2-(1-([1,1'-biphenyl]-4-yl)-3-methylbut-2-en-2-yl-1,1-d<sub>2</sub>)-4,4,5,5-tetramethyl-1,3,2-dioxaborolane (3a-d)

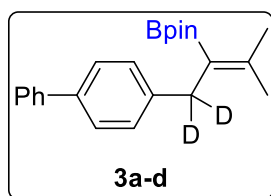

The reaction was performed following the **Condition D**. The residue was purified by flash column chromatograph (PE: EA=100:1) to give the product as a yellow solid (52.5 mg, 75%). m.p. 55-57 °C.  $^1\text{H NMR}$  (500 MHz,  $\text{CDCl}_3$ )  $\delta$  7.61 – 7.57 (m, 2H), 7.51 – 7.48 (m, 2H), 7.43 (dd,  $J = 8.4, 7.1$  Hz, 2H), 7.35 – 7.31 (m, 1H), 7.31 – 7.27 (m, 2H), 2.07 (s, 3H), 1.86 (s, 3H), 1.19 (s, 12H).  $^{13}\text{C NMR}$  (126 MHz,  $\text{CDCl}_3$ )  $\delta$  148.2, 141.6, 141.4, 138.3, 129.1, 128.7, 127.0, 126.9, 126.8, 82.9, 24.79, 24.75, 21.5.  $^{11}\text{B NMR}$  (160 MHz,  $\text{CDCl}_3$ )  $\delta$  31.88. **HRMS** (ESI,  $m/z$ ) calcd for  $\text{C}_{23}\text{H}_{28}\text{D}_2\text{BO}_2$   $[\text{M}+\text{H}]^+$ : 351.2459; found: 351.2461.

#### 1-([1,1'-biphenyl]-4-yl)-3-methylbutan-2-one (4)

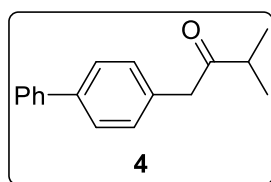

The reaction was performed following the **Condition G**. The residue was purified by flash column chromatograph (PE: EA=100:1) to give the product as a yellow solid (38.1 mg, 80%). m.p. 55-57 °C.  $^1\text{H NMR}$  (500 MHz,  $\text{CDCl}_3$ )  $\delta$  7.65 – 7.55 (m, 4H), 7.45 (t,  $J = 7.5$  Hz, 2H), 7.36 (t,  $J = 7.4$  Hz, 1H), 7.29 (d,  $J = 7.8$  Hz, 2H), 3.81 (s, 2H), 2.78 (p,  $J = 6.9$  Hz, 1H), 1.16 (s, 3H), 1.15 (s, 3H).  $^{13}\text{C NMR}$  (126 MHz,  $\text{CDCl}_3$ )  $\delta$  211.9, 140.8, 139.8, 133.5, 129.9, 128.8, 127.4, 127.3, 127.1, 47.3, 40.3, 18.4. **HRMS** (ESI,  $m/z$ ) calcd for  $\text{C}_{17}\text{H}_{19}\text{O}$   $[\text{M}+\text{H}]^+$ : 239.1430; found: 239.1431.

#### 2-(1-([1,1'-biphenyl]-4-yl)-3-methylbut-2-en-2-yl)thiophene (5)

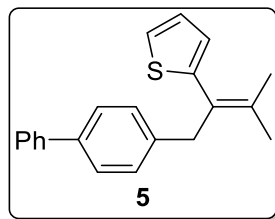

The reaction was performed following the **Condition H**. The residue was purified by flash column chromatograph (PE: EA=100:1) to give the product as a yellow oil liquid (36.5 mg, 60%). **<sup>1</sup>H NMR** (500 MHz, CDCl<sub>3</sub>) δ 7.62 – 7.58 (m, 2H), 7.53 – 7.49 (m, 2H), 7.46 – 7.41 (m, 2H), 7.36 – 7.32 (m, 1H), 7.23 (d, *J* = 8.0 Hz, 2H), 7.17 (dd, *J* = 5.1, 1.2 Hz, 1H), 6.94 (dd, *J* = 5.2, 3.5 Hz, 1H), 6.75 (dd, *J* = 3.5, 1.2 Hz, 1H), 3.84 (s, 2H), 1.99 (s, 3H), 1.92 (s, 3H). **<sup>13</sup>C NMR** (126 MHz, CDCl<sub>3</sub>) δ 145.3, 141.1, 139.2, 138.8, 133.6, 128.8, 128.7, 127.0, 126.4, 126.3, 126.0, 123.8, 40.8, 22.9, 21.6. **HRMS** (ESI, *m/z*) calcd for C<sub>21</sub>H<sub>21</sub>S [M+H]<sup>+</sup>: 305.1358; found: 305.1357.

#### 2-(1-([1,1'-biphenyl]-4-yl)-3-methylbut-2-en-2-yl)furan (6)

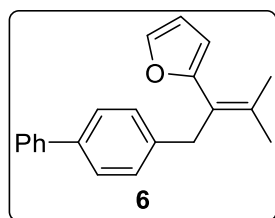

The reaction was performed following the **Condition I**. The residue was purified by flash column chromatograph (PE: EA=100:1) to give the product as a yellow oil liquid (32.8 mg, 57%). **<sup>1</sup>H NMR** (500 MHz, CDCl<sub>3</sub>) δ 7.61 – 7.58 (m, 2H), 7.53 – 7.50 (m, 2H), 7.45 (t, *J* = 7.7 Hz, 2H), 7.38 (d, *J* = 1.8 Hz, 1H), 7.36 – 7.33 (m, 1H), 7.25 (d, *J* = 8.1 Hz, 2H), 6.39 (dd, *J* = 3.3, 1.8 Hz, 1H), 6.20 (d, *J* = 3.3 Hz, 1H), 3.89 (s, 2H), 2.08 (s, 3H), 1.97 (s, 3H). **<sup>13</sup>C NMR** (126 MHz, CDCl<sub>3</sub>) δ 155.2, 141.2, 140.4, 139.8, 138.7, 133.3, 128.7, 128.5, 127.04, 127.00, 126.97, 123.3, 110.6, 108.4, 36.6, 23.0, 22.1. **HRMS** (ESI, *m/z*) calcd for C<sub>21</sub>H<sub>21</sub>O [M+H]<sup>+</sup>: 289.1587; found: 289.1591.

#### 4-(3-methyl-2-phenylbut-2-en-1-yl)-1,1'-biphenyl (7)

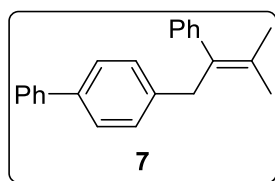

The reaction was performed following the **Condition J**. The residue was purified by flash column chromatograph (PE: EA=100:1) to give the product as a yellow oil solid (53.1 mg, 89%). m.p. 47-49 °C. **<sup>1</sup>H NMR** (500 MHz, CDCl<sub>3</sub>) δ 7.64 – 7.61 (m, 2H), 7.54 – 7.50 (m, 2H), 7.49 – 7.44 (m, 2H), 7.39 – 7.34 (m, 1H), 7.32 – 7.28 (m, 2H), 7.25 – 7.20 (m, 3H), 7.14 – 7.10 (m, 2H), 3.85 (s, 2H), 2.02 (s, 3H), 1.74 (s, 3H). **<sup>13</sup>C NMR** (126 MHz, CDCl<sub>3</sub>) δ 143.9, 141.2, 139.6, 138.6, 133.5, 129.8, 129.1, 129.0, 128.8, 127.9, 127.02, 126.96, 126.0, 40.2, 22.4, 21.0. **HRMS** (ESI, *m/z*) calcd for C<sub>23</sub>H<sub>23</sub> [M+H]<sup>+</sup>: 299.1794; found: 299.1789.

#### 2-(2-([1,1'-biphenyl]-4-ylmethyl)-3-methylbut-2-en-1-yl)-4,4,5,5-tetramethyl-1,3,2-dioxaborolane (8)

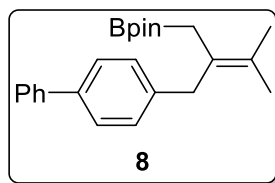

The reaction was performed following the **Condition K**. The residue was purified by flash column chromatograph (PE: EA=100:1) to give the product as a yellow oil liquid (58.0 mg, 80%). **<sup>1</sup>H NMR** (500 MHz, CDCl<sub>3</sub>) δ 7.60 – 7.57 (m, 2H), 7.51 – 7.48 (m, 2H), 7.43 (t, *J* = 7.8 Hz, 2H), 7.35 – 7.31 (m, 1H), 7.24 (d, *J* = 7.8 Hz, 2H), 3.49 (s, 2H), 2.14 (t, *J* = 8.4 Hz, 2H), 1.80 (s, 3H), 1.77 (s, 3H), 1.24 (s, 12H). **<sup>13</sup>C NMR** (126 MHz, CDCl<sub>3</sub>) δ 141.3, 140.4, 138.5, 132.6, 128.9, 128.7, 127.0, 126.9, 126.9, 126.0, 83.0, 36.6, 24.9, 21.0, 20.4. **<sup>11</sup>B NMR** (160 MHz, CDCl<sub>3</sub>) δ 34.01. **HRMS** (ESI, *m/z*) calcd for C<sub>24</sub>H<sub>32</sub>BO<sub>2</sub> [M+H]<sup>+</sup>: 363.2490; found: 363.2482.

#### 4-(2-iodo-3-methylbut-2-en-1-yl)-1,1'-biphenyl (9)

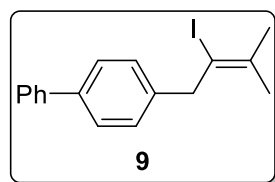

The reaction was performed following the **Condition L**. The residue was purified by flash column chromatograph (PE: EA=100:1) to give the product as a yellow solid (24.4 mg, 35%). m.p.76-78 °C. **<sup>1</sup>H NMR** (500 MHz, CDCl<sub>3</sub>) δ 7.62 – 7.58 (m, 2H), 7.57 – 7.52 (m, 2H), 7.43 (dd, *J* = 8.4, 7.0 Hz, 2H), 7.36 – 7.31 (m, 1H), 7.27 (d, *J* = 8.4 Hz, 2H), 4.03 (s, 2H), 2.05 (s, 3H), 2.00 (s, 3H). **<sup>13</sup>C NMR** (126 MHz, CDCl<sub>3</sub>) δ 141.0, 139.5, 138.1, 137.9, 128.8, 128.7, 127.2, 127.1, 127.0, 99.2, 47.0, 31.7, 19.8. **HRMS** (ESI, *m/z*) calcd for C<sub>17</sub>H<sub>18</sub>I [M+H]<sup>+</sup>: 349.0448; found: 349.0456.

## 9. References

- [1] Varela-Fernández, A.; Varela, J. A.; Saá, C. *Adv. Synth. Catal.* **2011**, *353*, 1933-1937
- [2] Kuang, Z.; Chen, H.; Yan, J.; Yang, K.; Lan, Y.; Song, Q. *Org. Lett.* **2018**, *20*, 5153-5157.
- [3] Bai, X.-Y.; Zhao, W.; Sun, X.; Li, B.-J. *J. Am. Chem. Soc.* **2019**, *141*, 19870-19878.
- [4] Ma, W.; Zhang, X.; Fan, J.; Liu, Y.; Tang, W.; Xue, D.; Li, C.; Xiao, J.; Wang, C. *J. Am. Chem. Soc.* **2019**, *141*, 13506-13515.
- [5] Gao, S.; Chen, M. *Org. Lett.* **2020**, *22*, 400-404.
- [6] Tao, L.; Guo, X.; Li, J.; Li, R.; Lin, Z.; Zhao, W. *J. Am. Chem. Soc.* **2020**, *142*, 18118-18127.
- [7] Aota, Y.; Maeda, Y.; Kano, T.; Maruoka, K. *Chemistry – A European Journal* **2019**, *25*, 15755-15758.
- [8] Ishida, T.; Kobayashi, R.; Yamada, T. *Organic Letters* **2014**, *16*, 2430-2433.

## 10. NMR Spectroscopic Data

$^1\text{H}$  spectra ( $\text{CDCl}_3$ ) of 2-(1-([1,1'-biphenyl]-4-yl)-3-methylbut-2-en-2-yl)-4,4,5,5-tetramethyl-1,3,2-dioxaborolane (**3a**)

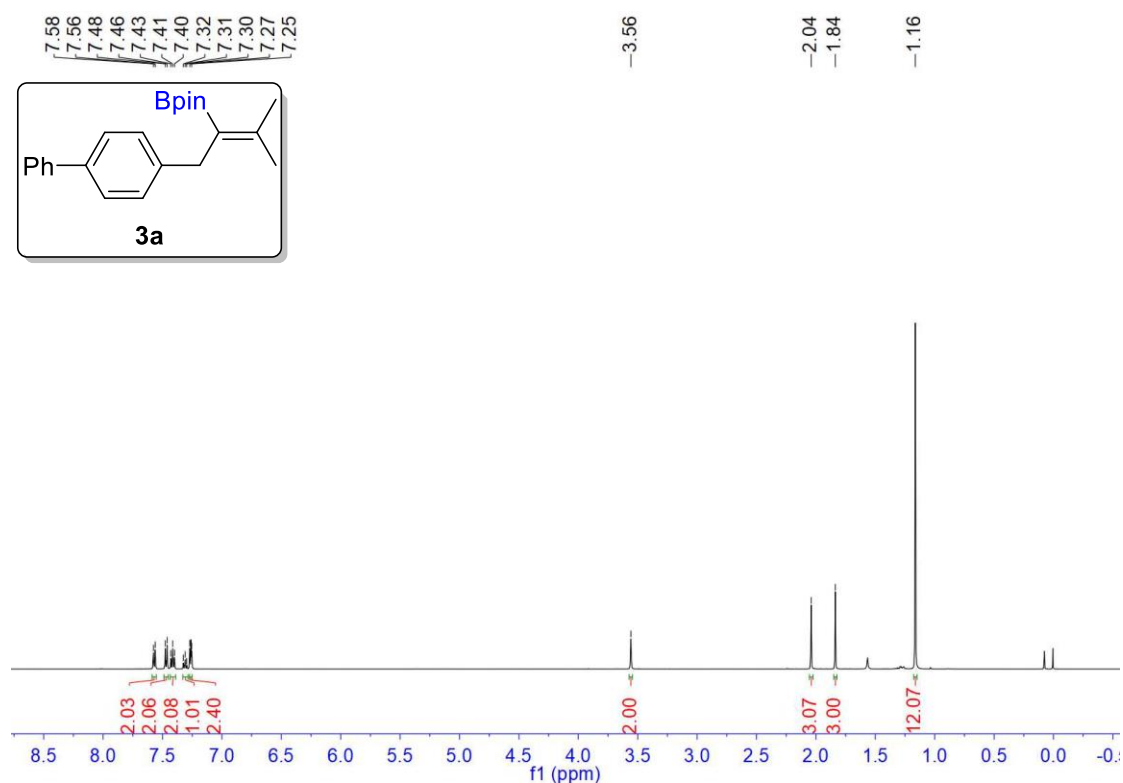

$^{13}\text{C}$  spectra ( $\text{CDCl}_3$ ) of 2-(1-([1,1'-biphenyl]-4-yl)-3-methylbut-2-en-2-yl)-4,4,5,5-tetramethyl-1,3,2-dioxaborolane (**3a**)

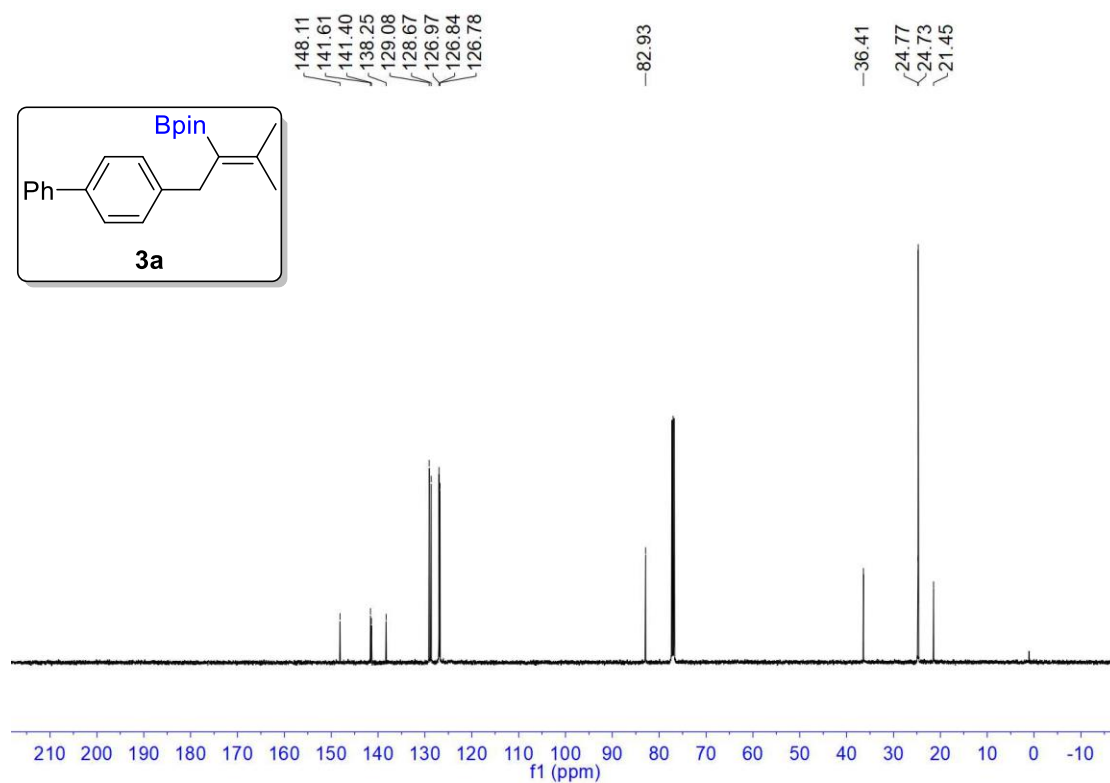

$^{11}\text{B}$  spectra ( $\text{CDCl}_3$ ) of 2-(1-([1,1'-biphenyl]-4-yl)-3-methylbut-2-en-2-yl)-4,4,5,5-tetramethyl-1,3,2-dioxaborolane (**3a**)

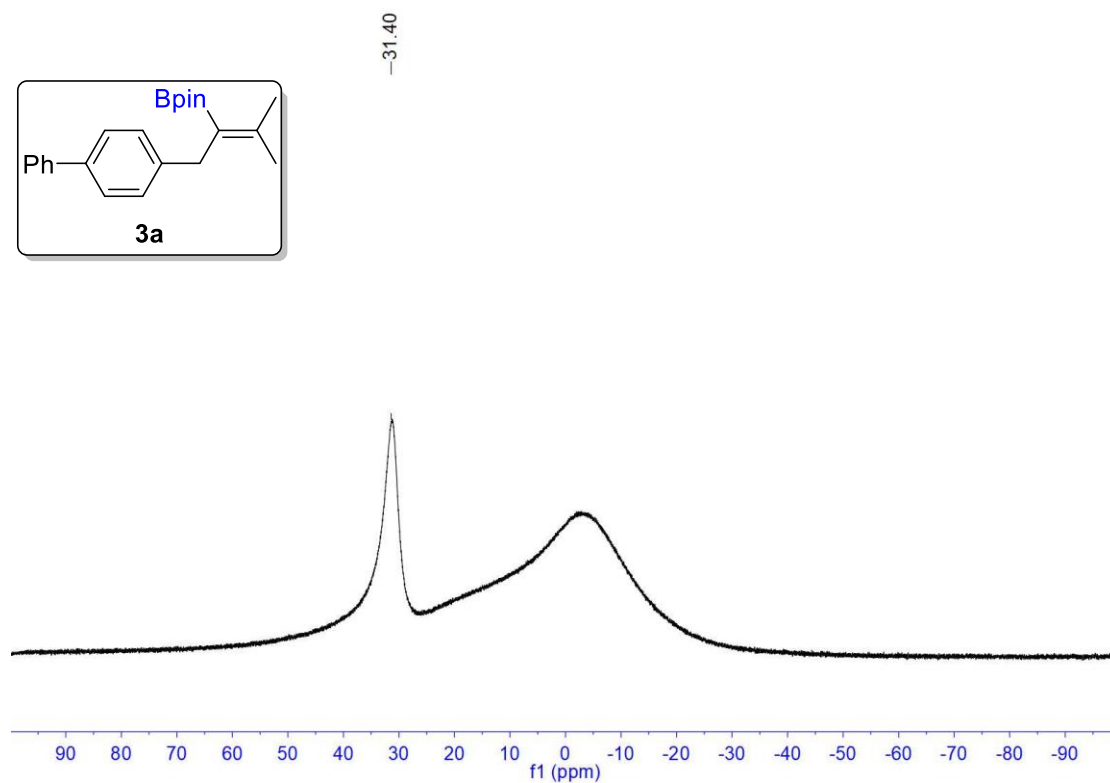

$^1\text{H}$  spectra ( $\text{CDCl}_3$ ) of 4,4,5,5-tetramethyl-2-(3-methyl-1-(p-tolyl)but-2-en-2-yl)-1,3,2-dioxaborolane (**3b**)

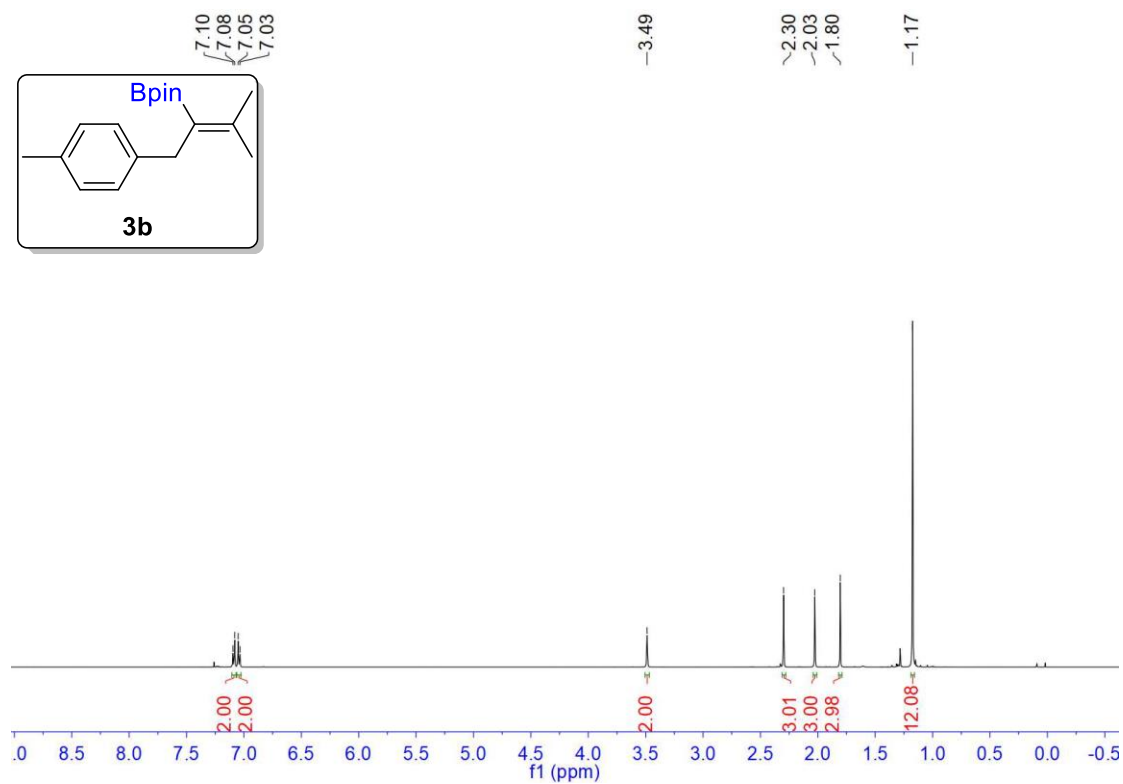



$^{13}\text{C}$  spectra ( $\text{CDCl}_3$ ) of 4,4,5,5-tetramethyl-2-(3-methyl-1-(p-tolyl)but-2-en-2-yl)-1,3,2-dioxaborolane (**3b**)

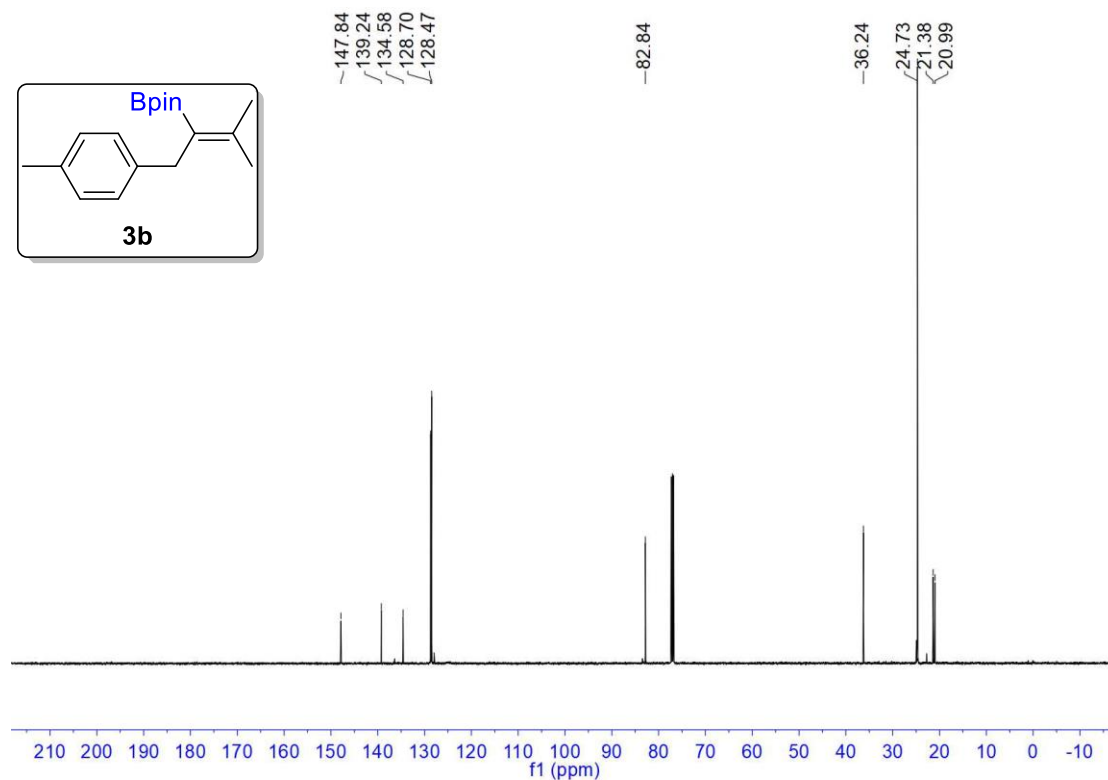

$^{11}\text{B}$  spectra ( $\text{CDCl}_3$ ) of 4,4,5,5-tetramethyl-2-(3-methyl-1-(p-tolyl)but-2-en-2-yl)-1,3,2-dioxaborolane (**3b**)

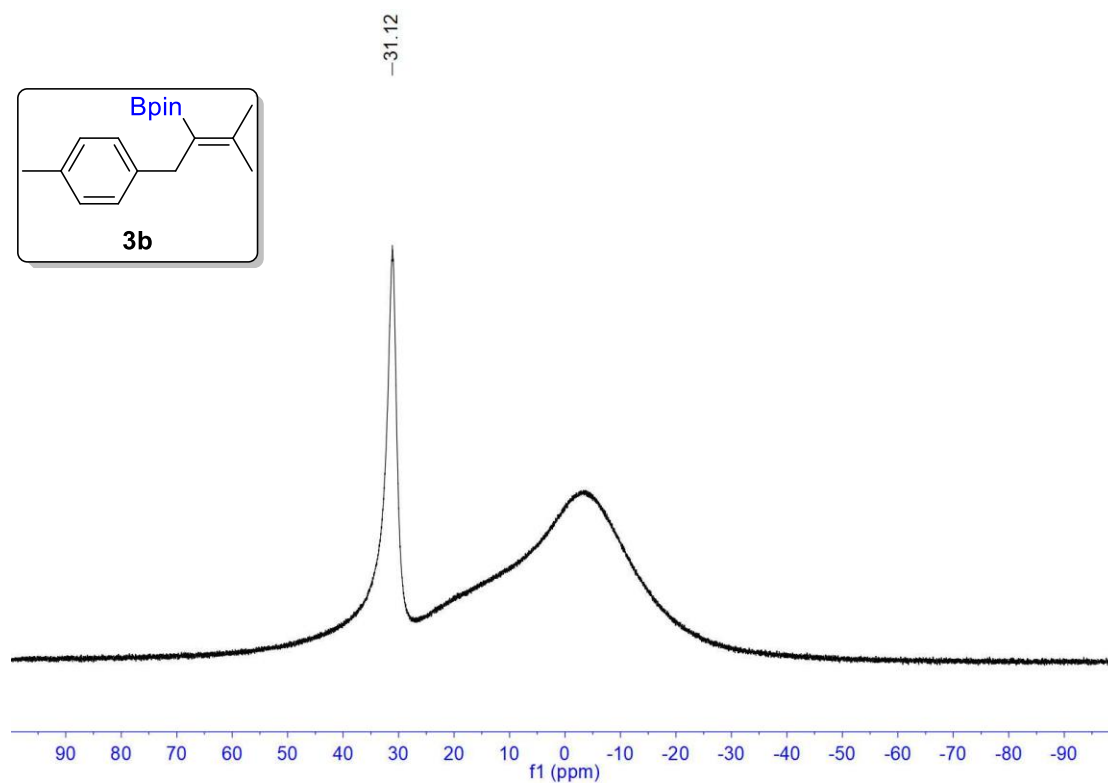

$^1\text{H}$  spectra ( $\text{CDCl}_3$ ) of 2-(1-(4-ethylphenyl)-3-methylbut-2-en-2-yl)-4,4,5,5-tetramethyl-1,3,2-dioxaborolane (**3c**)

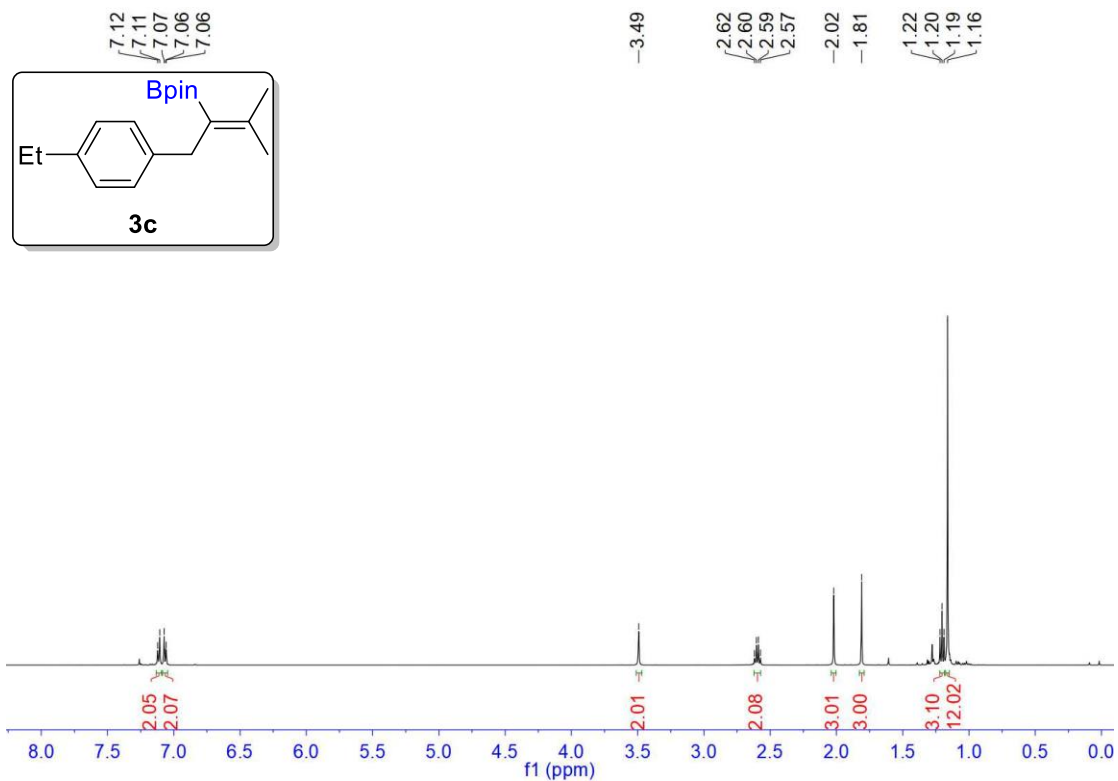

$^{13}\text{C}$  spectra ( $\text{CDCl}_3$ ) of 2-(1-(4-ethylphenyl)-3-methylbut-2-en-2-yl)-4,4,5,5-tetramethyl-1,3,2-dioxaborolane (**3c**)

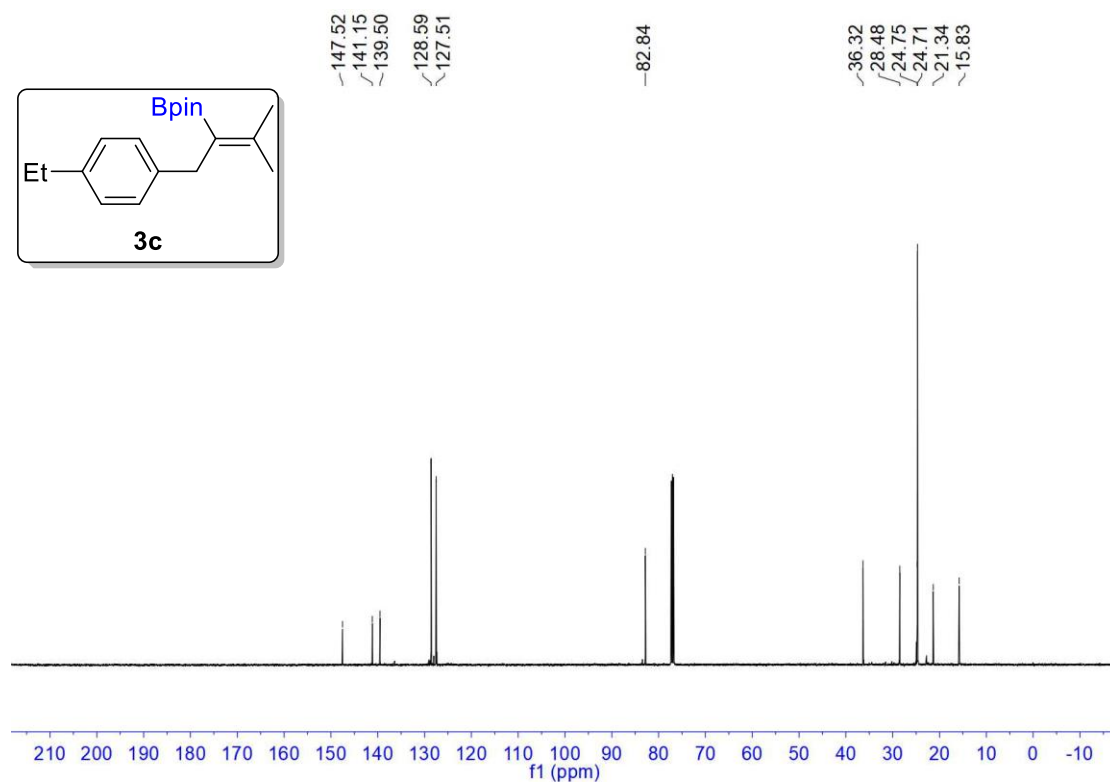

$^{11}\text{B}$  spectra ( $\text{CDCl}_3$ ) of 2-(1-(4-ethylphenyl)-3-methylbut-2-en-2-yl)-4,4,5,5-tetramethyl-1,3,2-dioxaborolane (**3c**)

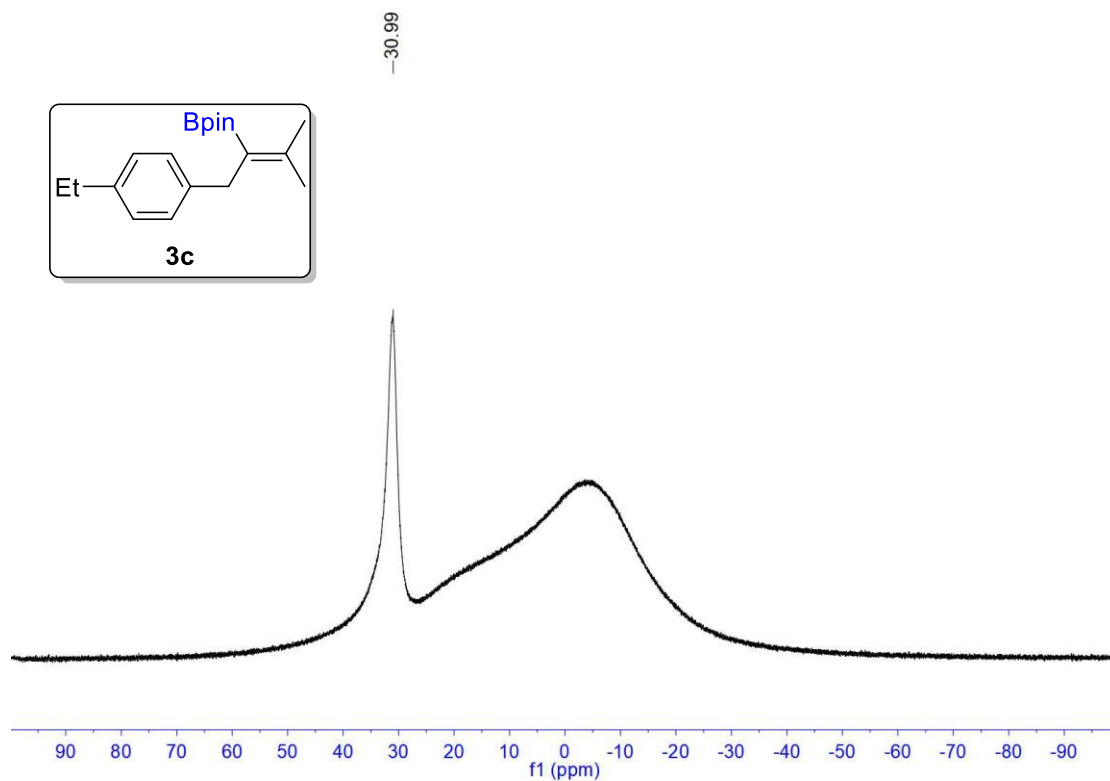

$^1\text{H}$  spectra ( $\text{CDCl}_3$ ) of 2-(1-(4-(tert-butyl)phenyl)-3-methylbut-2-en-2-yl)-4,4,5,5-tetramethyl-1,3,2-dioxaborolane (**3d**)

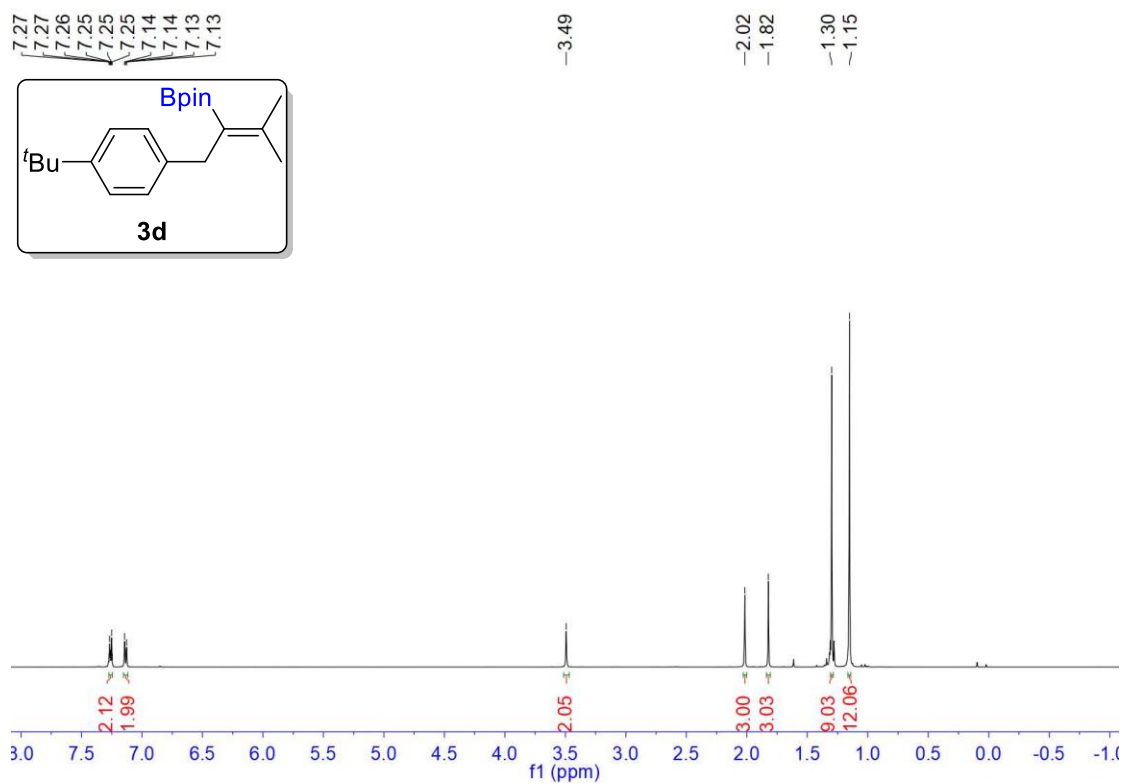

$^{13}\text{C}$  spectra ( $\text{CDCl}_3$ ) of 2-(1-(4-(tert-butyl)phenyl)-3-methylbut-2-en-2-yl)-4,4,5,5-tetramethyl-1,3,2-dioxaborolane (**3d**)

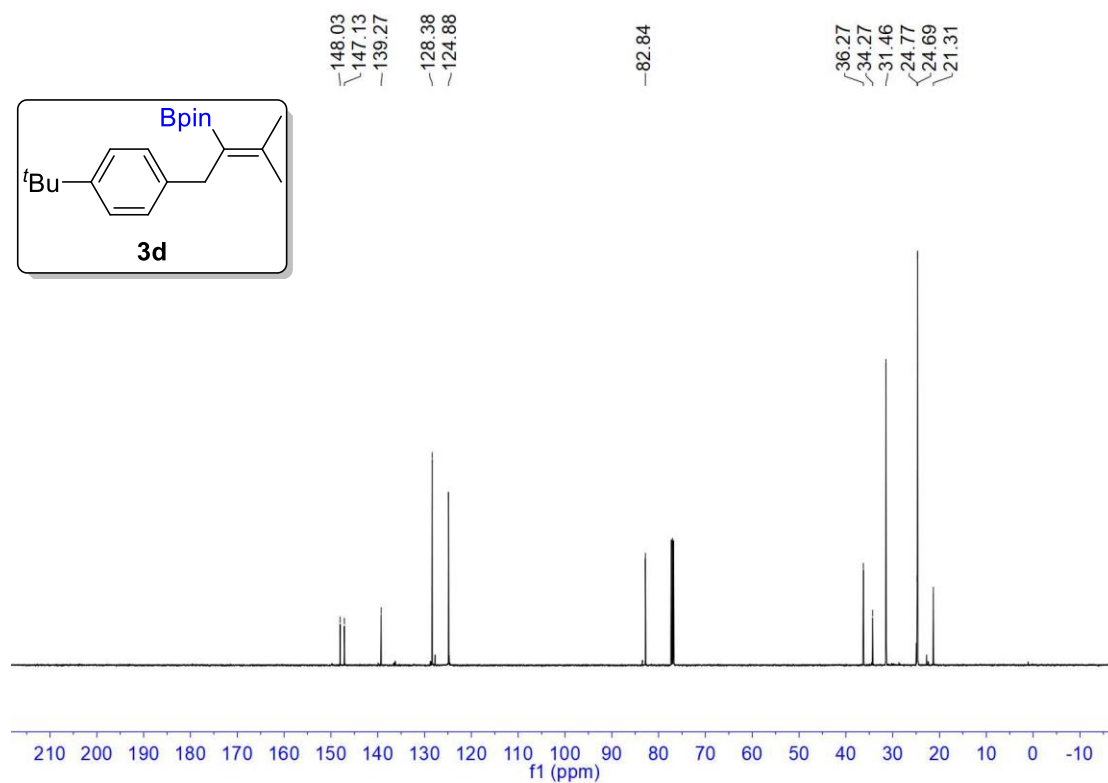

$^{11}\text{B}$  spectra ( $\text{CDCl}_3$ ) of 2-(1-(4-(tert-butyl)phenyl)-3-methylbut-2-en-2-yl)-4,4,5,5-tetramethyl-1,3,2-dioxaborolane (**3d**)

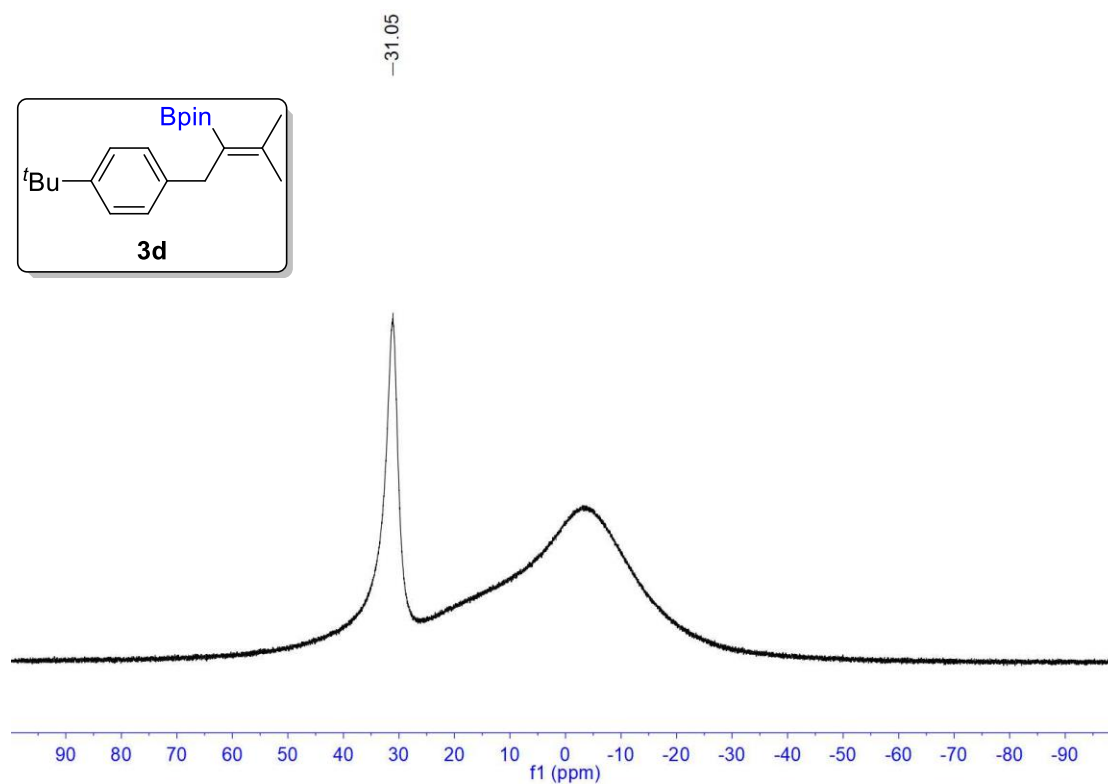

$^1\text{H}$  spectra ( $\text{CDCl}_3$ ) of 2-(1-(4-butylphenyl)-3-methylbut-2-en-2-yl)-4,4,5,5-tetramethyl-1,3,2-dioxaborolane (**3e**)

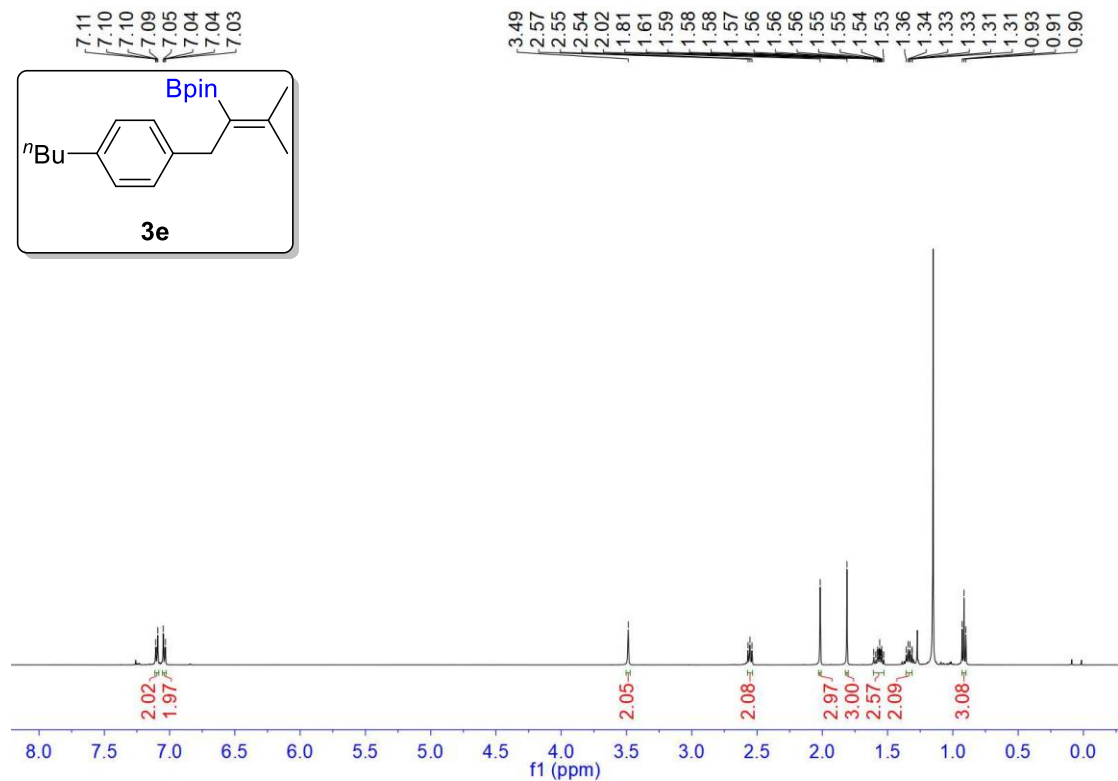

$^{13}\text{C}$  spectra ( $\text{CDCl}_3$ ) of 2-(1-(4-butylphenyl)-3-methylbut-2-en-2-yl)-4,4,5,5-tetramethyl-1,3,2-dioxaborolane (**3e**)

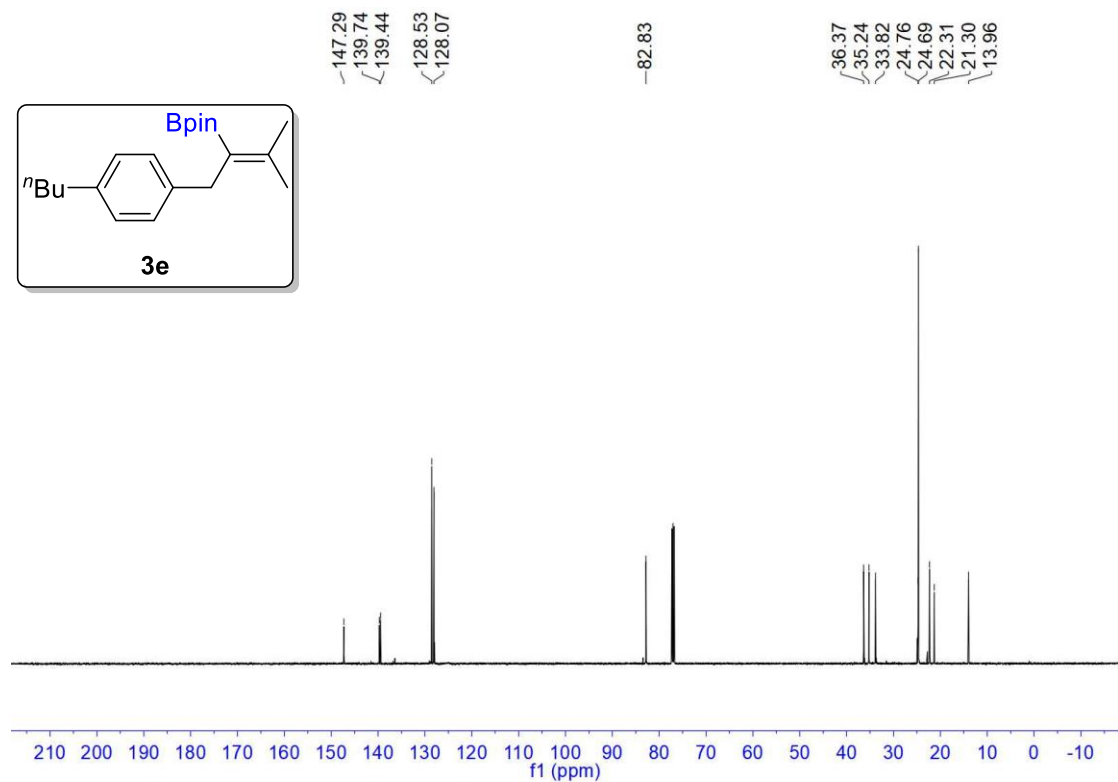

$^{11}\text{B}$  spectra ( $\text{CDCl}_3$ ) of 2-(1-(4-butylphenyl)-3-methylbut-2-en-2-yl)-4,4,5,5-tetramethyl-1,3,2-dioxaborolane (**3e**)

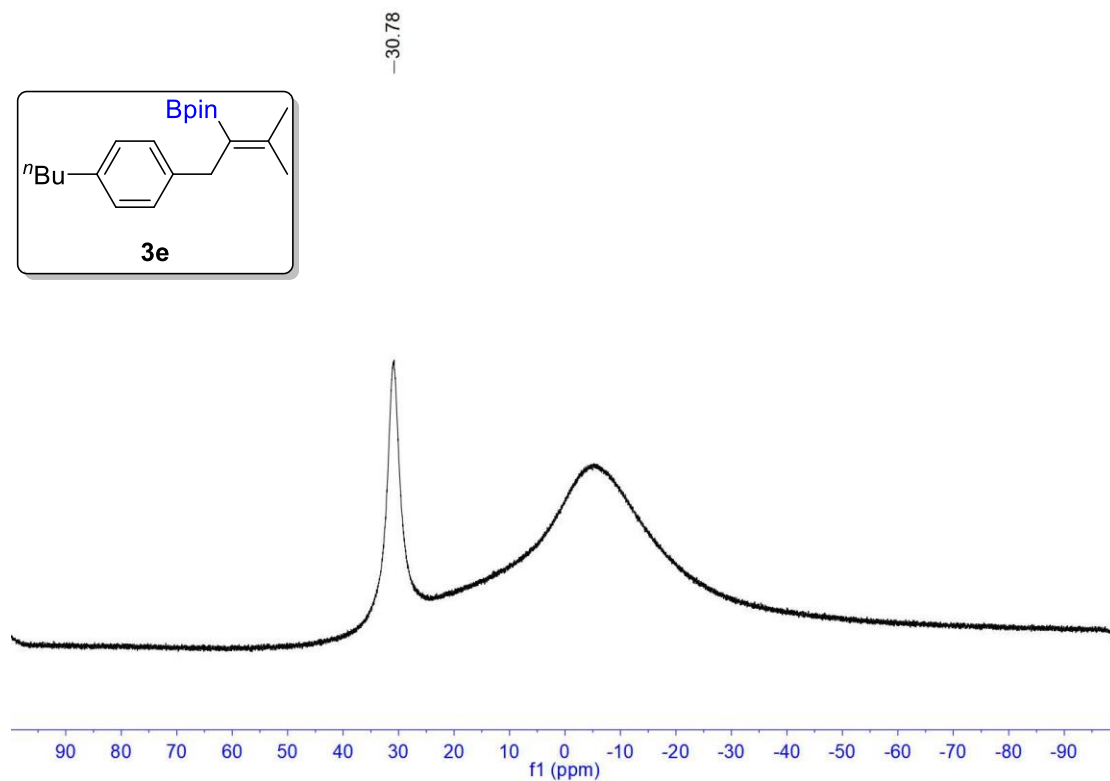

$^1\text{H}$  spectra ( $\text{CDCl}_3$ ) of 2-(1-(4-fluorophenyl)-3-methylbut-2-en-2-yl)-4,4,5,5-tetramethyl-1,3,2-dioxaborolane (**3f**)

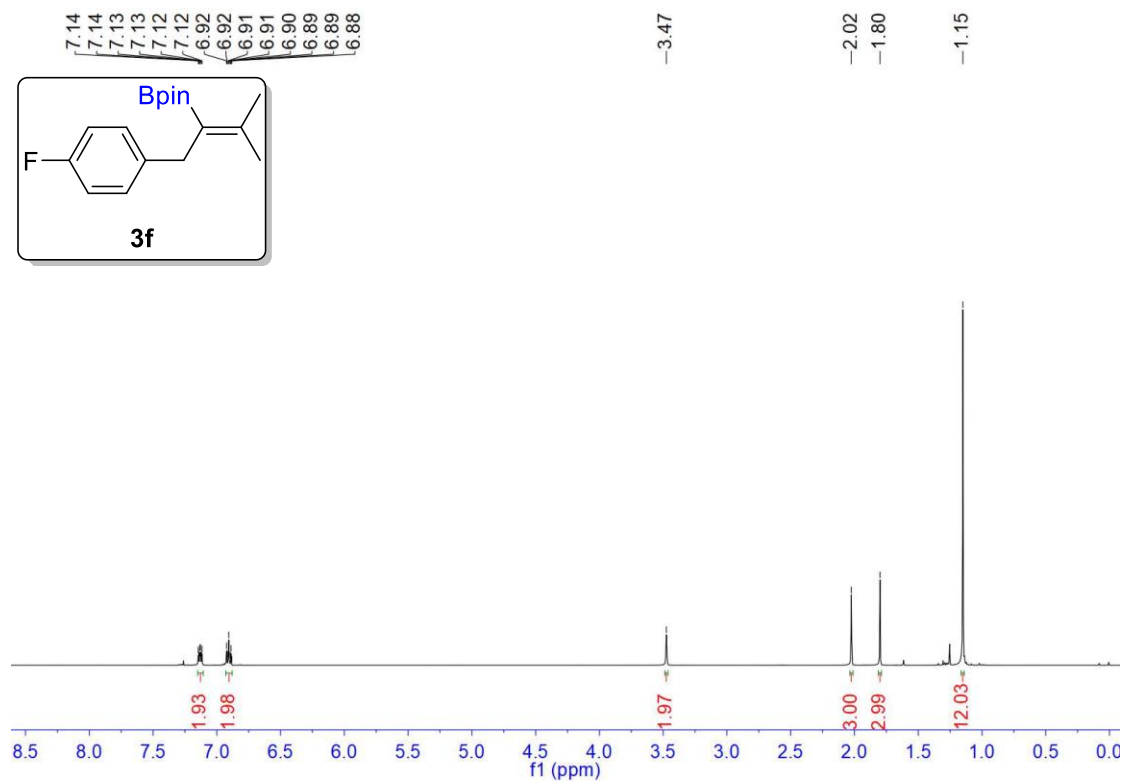

$^{13}\text{C}$  spectra ( $\text{CDCl}_3$ ) of 2-(1-(4-fluorophenyl)-3-methylbut-2-en-2-yl)-4,4,5,5-tetramethyl-1,3,2-dioxaborolane (**3f**)

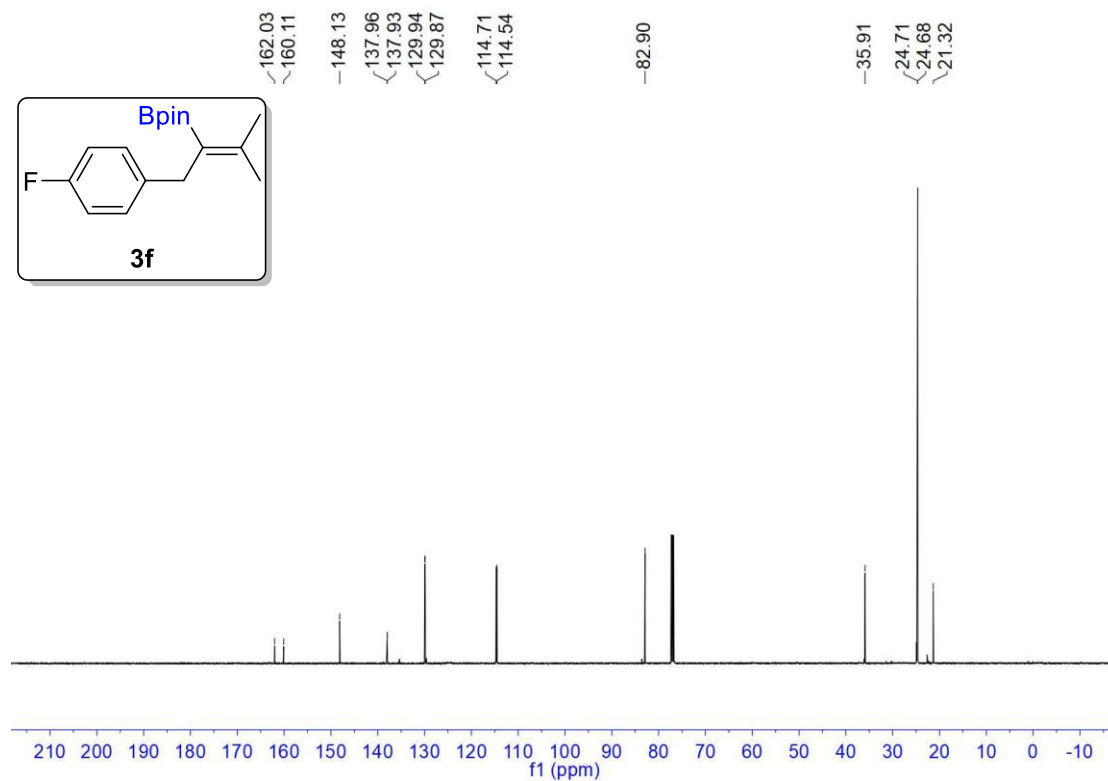

$^{19}\text{F}$  spectra ( $\text{CDCl}_3$ ) of 2-(1-(4-fluorophenyl)-3-methylbut-2-en-2-yl)-4,4,5,5-tetramethyl-1,3,2-dioxaborolane (**3f**)

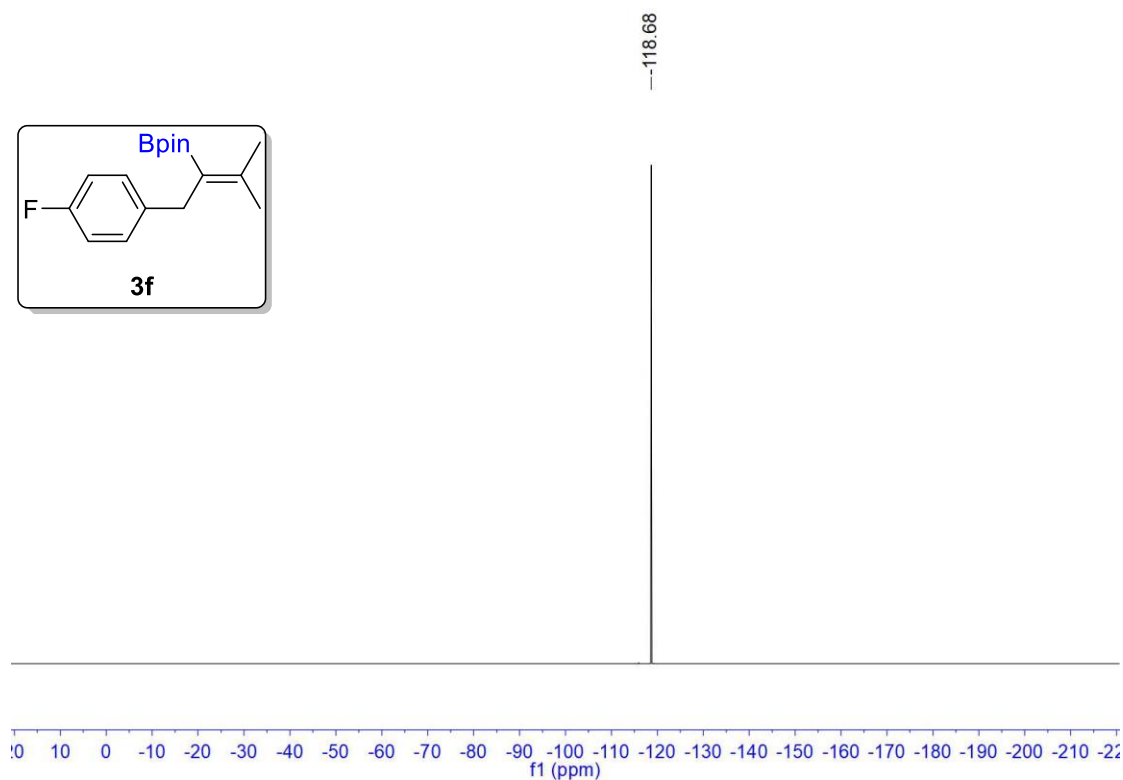

$^{11}\text{B}$  spectra ( $\text{CDCl}_3$ ) of 2-(1-(4-fluorophenyl)-3-methylbut-2-en-2-yl)-4,4,5,5-tetramethyl-1,3,2-dioxaborolane (**3f**)

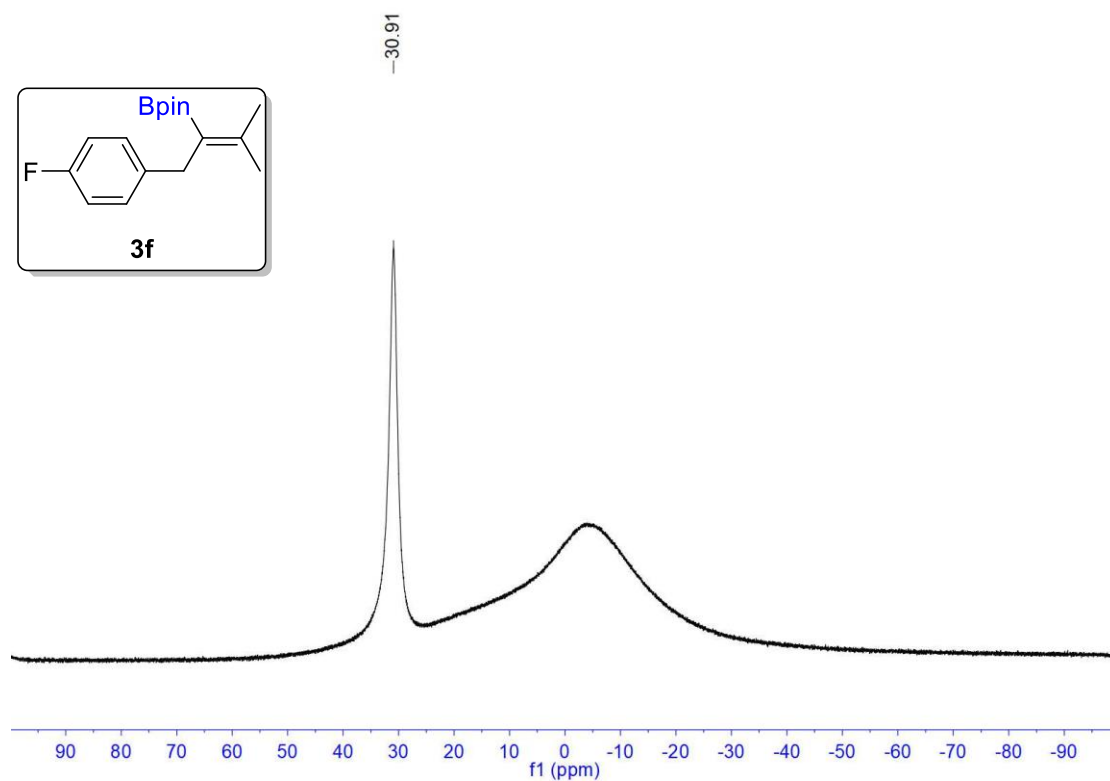

$^1\text{H}$  spectra ( $\text{CDCl}_3$ ) of 2-(1-(4-chlorophenyl)-3-methylbut-2-en-2-yl)-4,4,5,5-tetramethyl-1,3,2-dioxaborolane (**3g**)

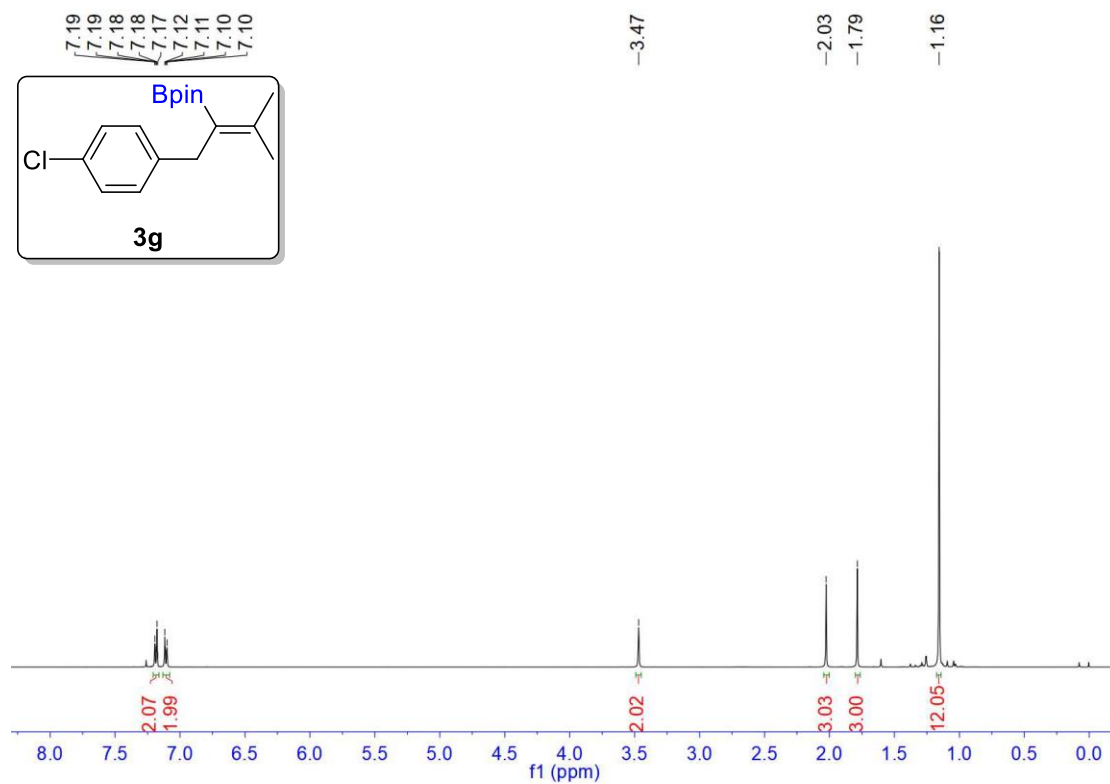



$^{13}\text{C}$  spectra ( $\text{CDCl}_3$ ) of 2-(1-(4-chlorophenyl)-3-methylbut-2-en-2-yl)-4,4,5,5-tetramethyl-1,3,2-dioxaborolane (**3g**)

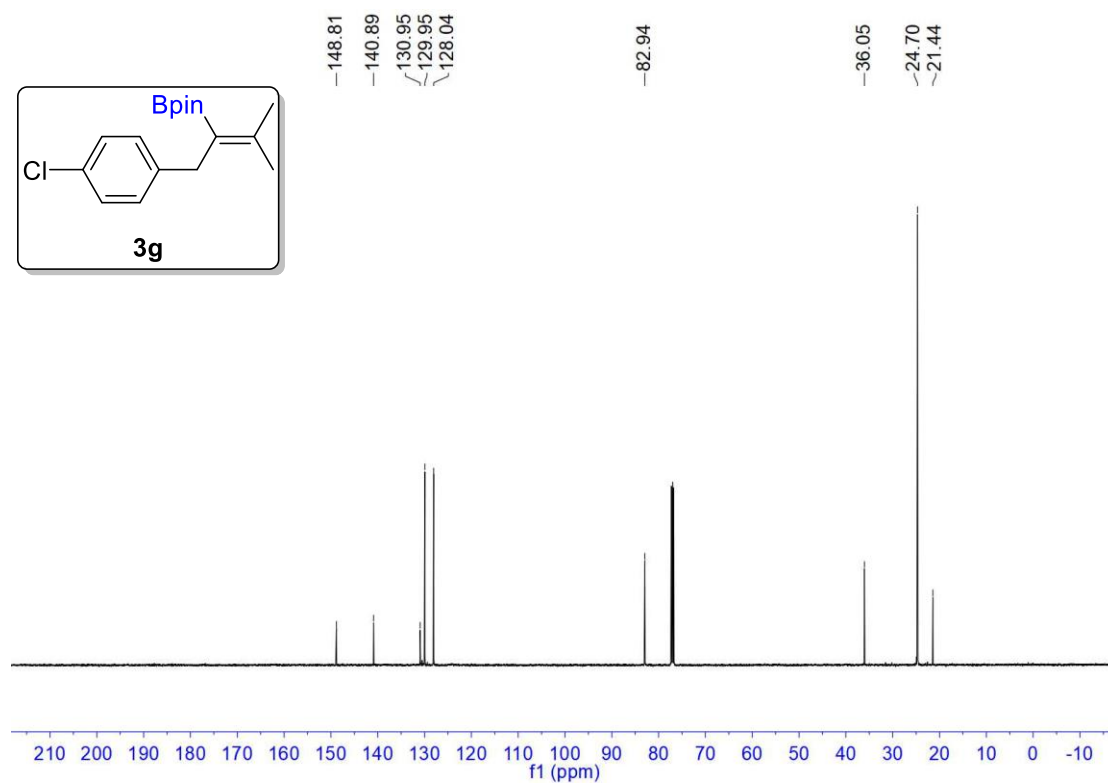

$^{11}\text{B}$  spectra ( $\text{CDCl}_3$ ) of 2-(1-(4-chlorophenyl)-3-methylbut-2-en-2-yl)-4,4,5,5-tetramethyl-1,3,2-dioxaborolane (**3g**)

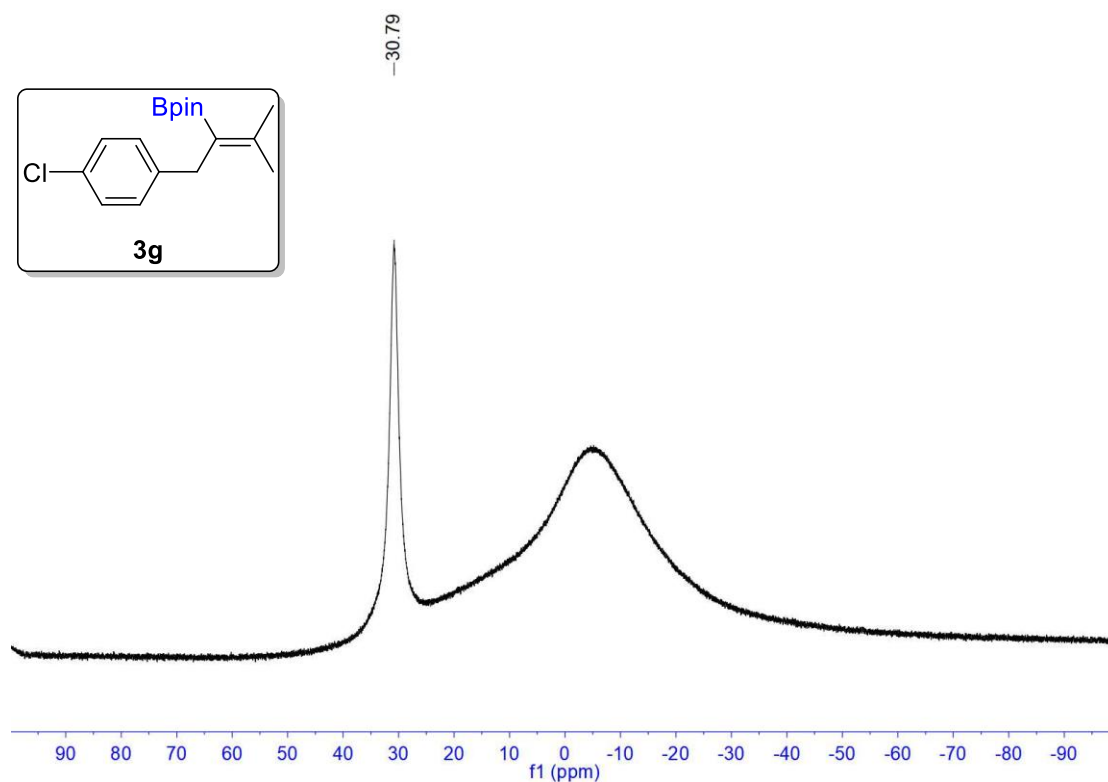

<sup>1</sup>H spectra (CDCl<sub>3</sub>) of 4,4,5,5-tetramethyl-2-(3-methyl-1-phenylbut-2-en-2-yl)-1,3,2-dioxaborolane

(3h)

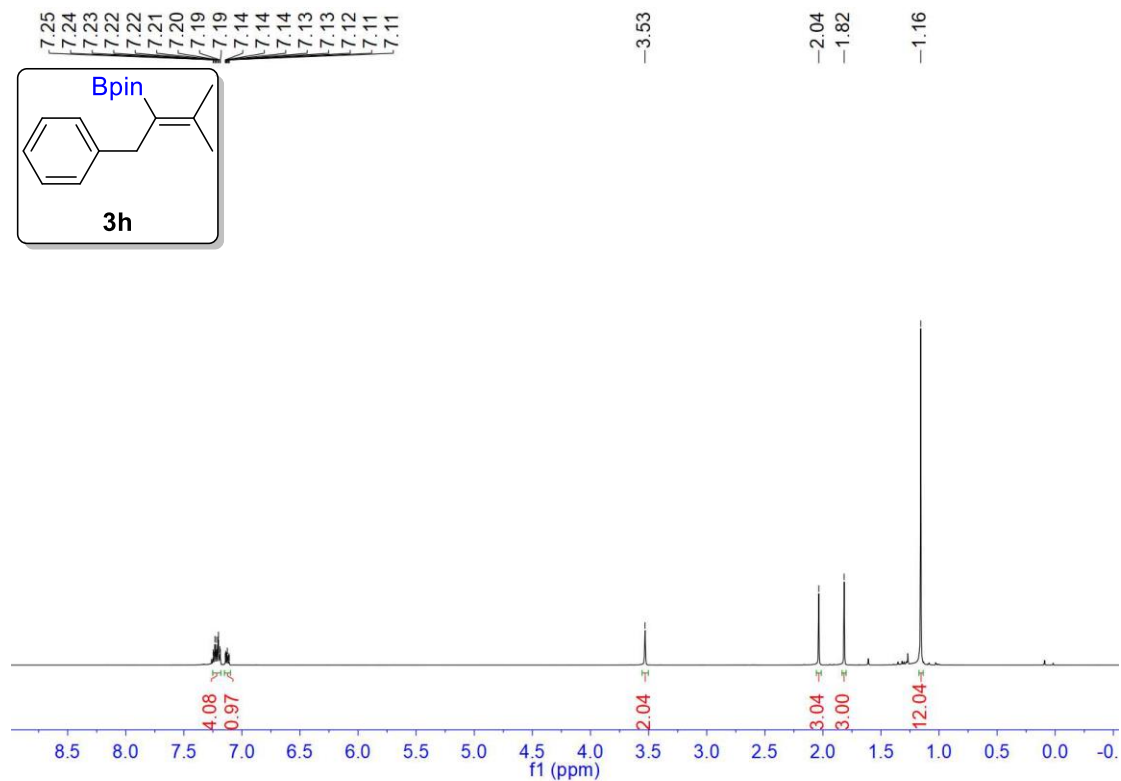

<sup>13</sup>C spectra (CDCl<sub>3</sub>) of 4,4,5,5-tetramethyl-2-(3-methyl-1-phenylbut-2-en-2-yl)-1,3,2-dioxaborolane

(3h)

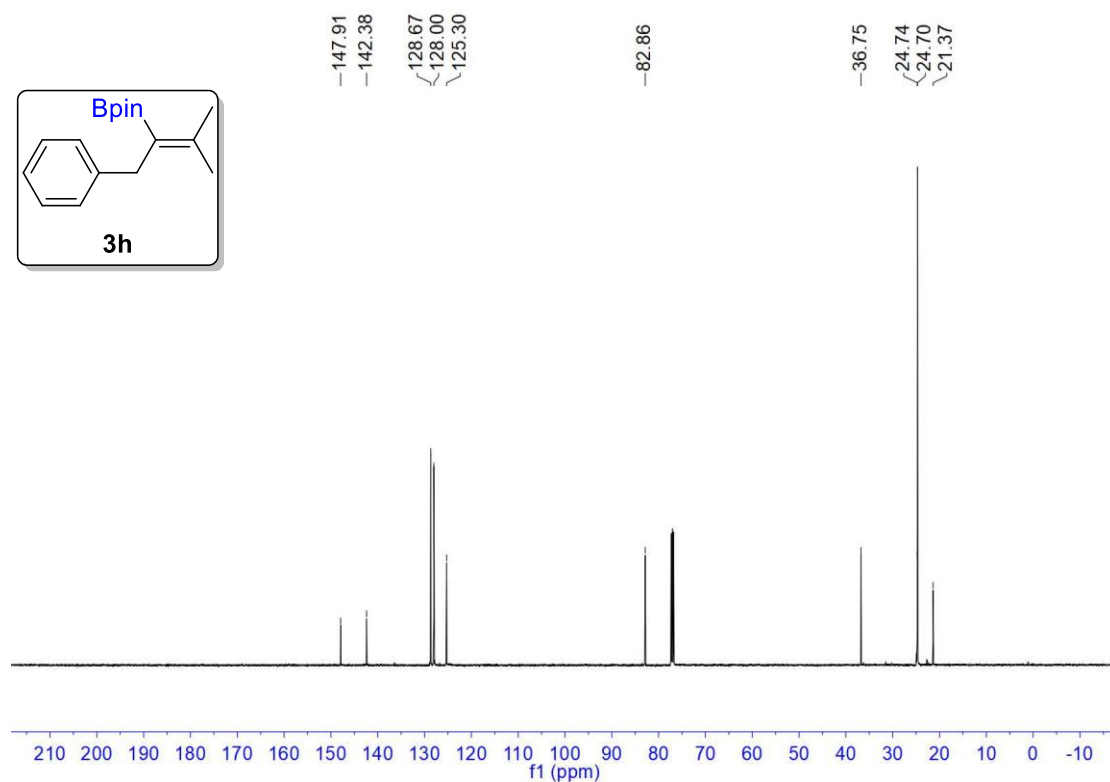

$^{11}\text{B}$  spectra ( $\text{CDCl}_3$ ) of 4,4,5,5-tetramethyl-2-(3-methyl-1-phenylbut-2-en-2-yl)-1,3,2-dioxaborolane (**3h**)

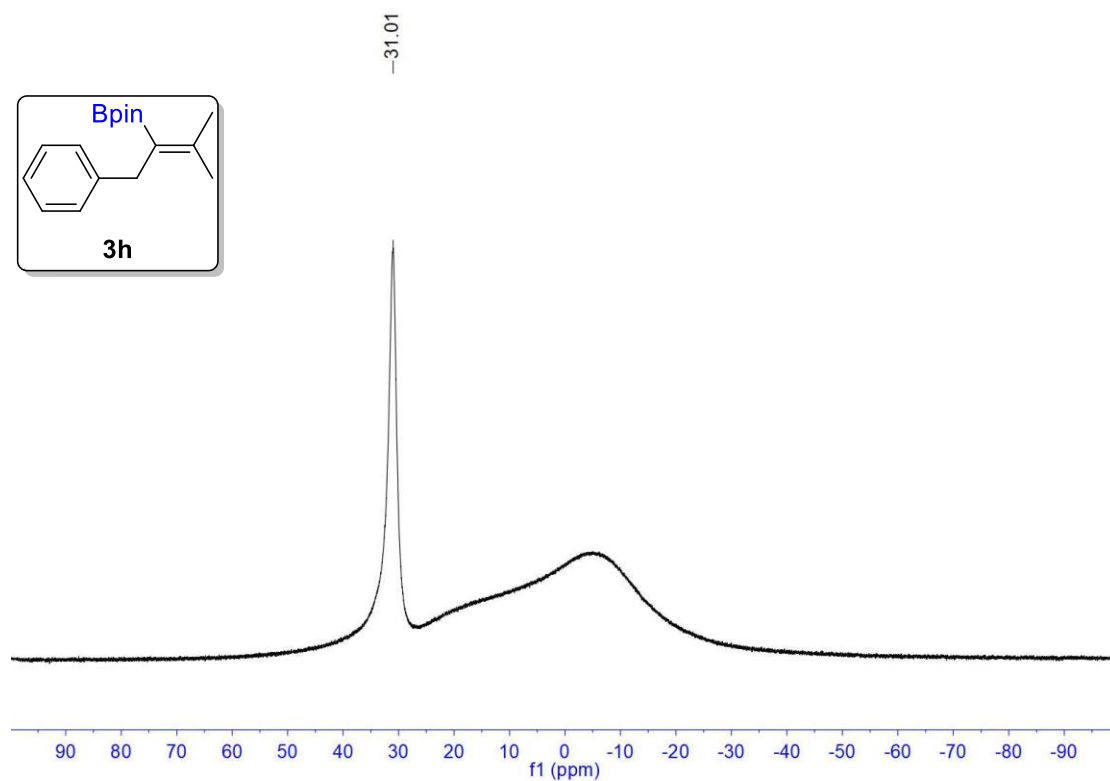

$^1\text{H}$  spectra ( $\text{CDCl}_3$ ) of 4-(3-methyl-2-(4,4,5,5-tetramethyl-1,3,2-dioxaborolan-2-yl)but-2-en-1-yl)aniline (**3i**)

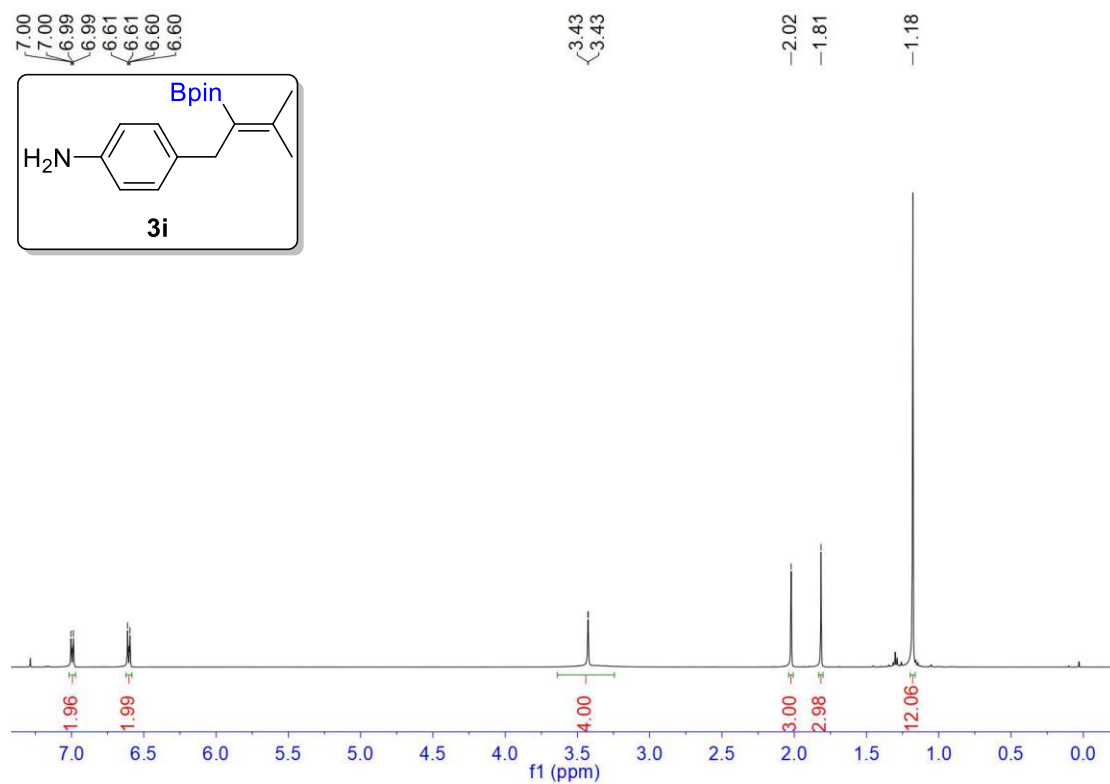

$^{13}\text{C}$  spectra ( $\text{CDCl}_3$ ) of 4-(3-methyl-2-(4,4,5,5-tetramethyl-1,3,2-dioxaborolan-2-yl)but-2-en-1-yl)aniline (**3i**)

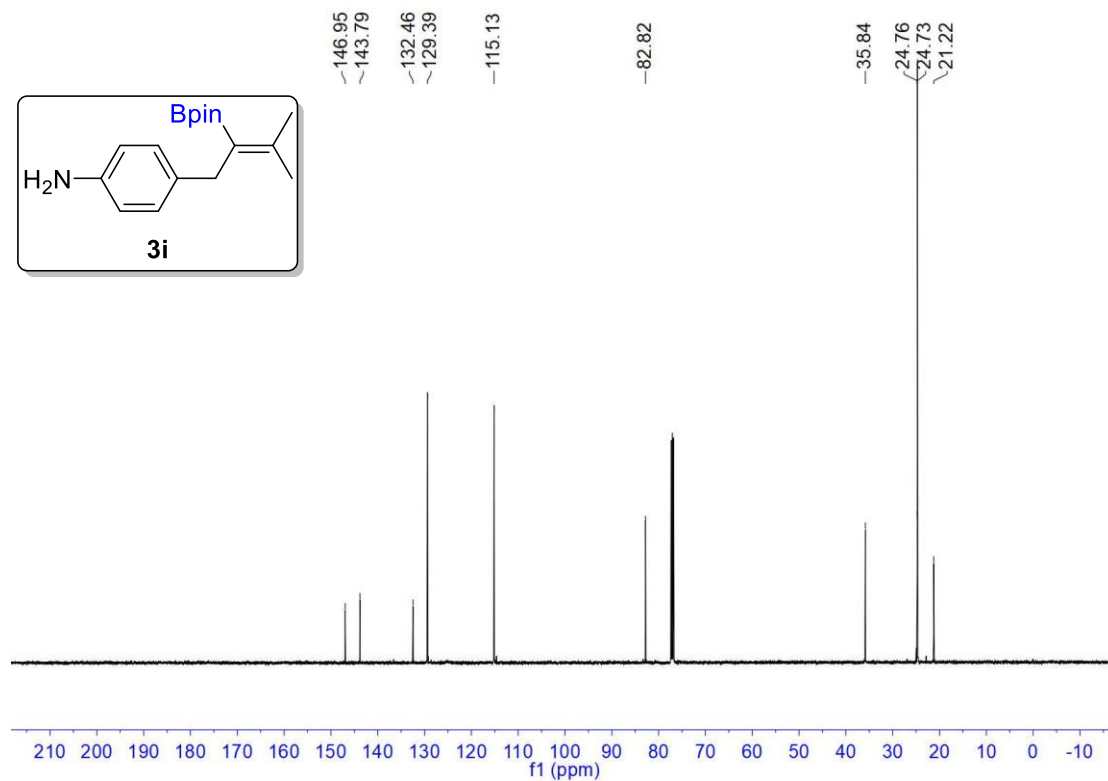

$^{11}\text{B}$  spectra ( $\text{CDCl}_3$ ) of 4-(3-methyl-2-(4,4,5,5-tetramethyl-1,3,2-dioxaborolan-2-yl)but-2-en-1-yl)aniline (**3i**)

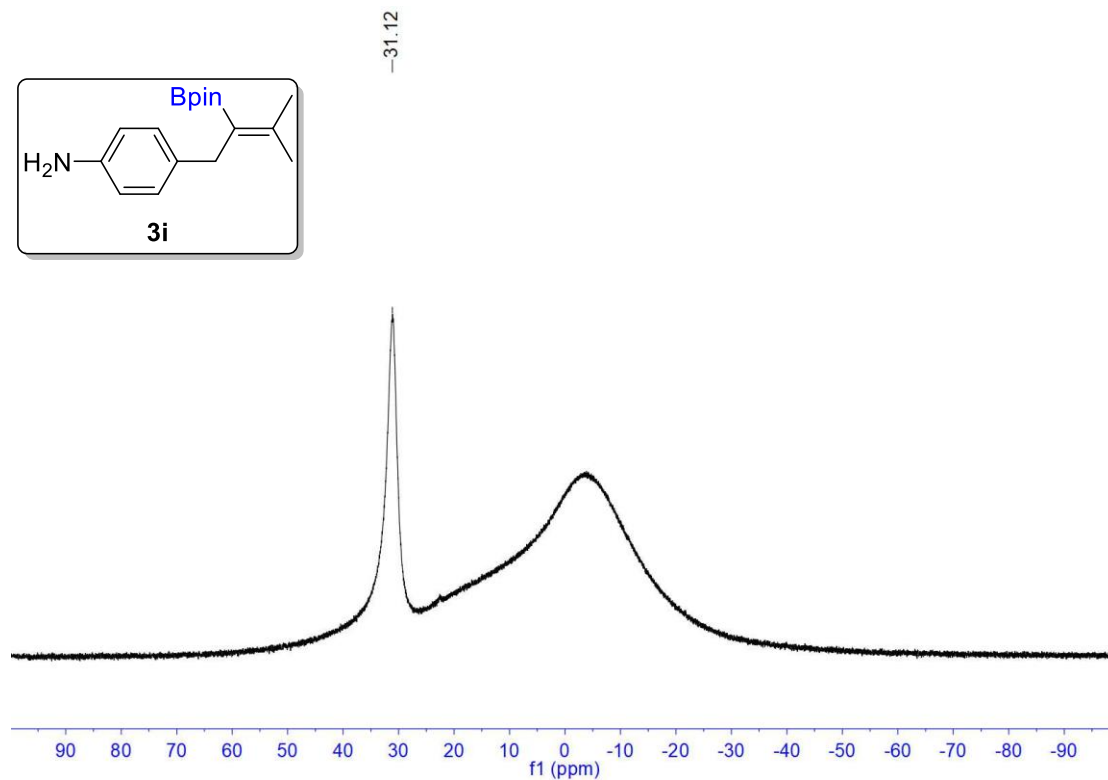

$^1\text{H}$  spectra ( $\text{CDCl}_3$ ) of 4-(3-methyl-2-(4,4,5,5-tetramethyl-1,3,2-dioxaborolan-2-yl)but-2-en-1-yl)phenol (**3j**)

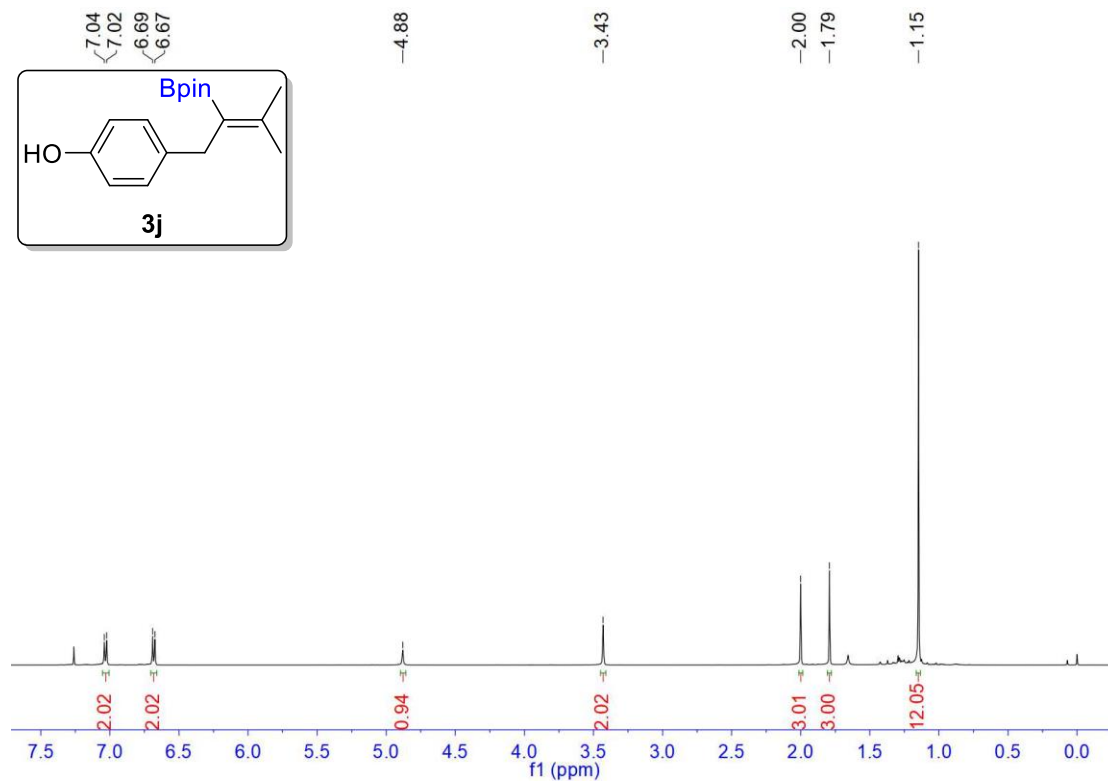

$^{13}\text{C}$  spectra ( $\text{CDCl}_3$ ) of 4-(3-methyl-2-(4,4,5,5-tetramethyl-1,3,2-dioxaborolan-2-yl)but-2-en-1-yl)phenol (**3j**)

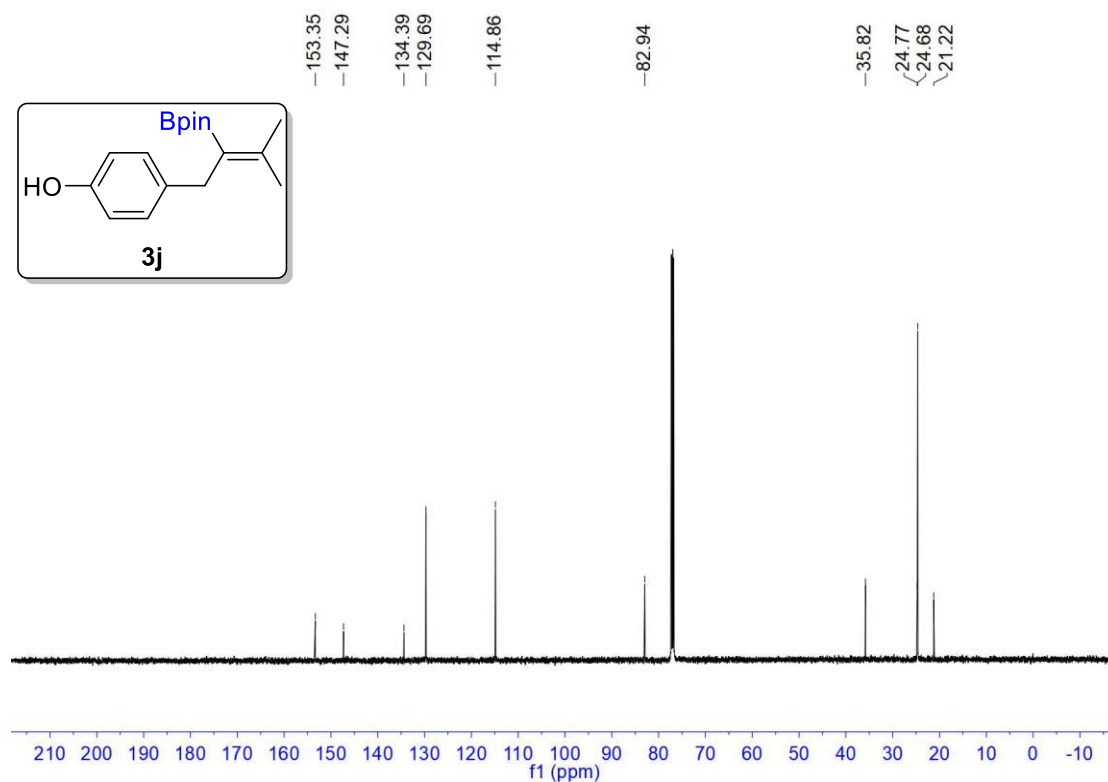

$^{11}\text{B}$  spectra ( $\text{CDCl}_3$ ) of 4-(3-methyl-2-(4,4,5,5-tetramethyl-1,3,2-dioxaborolan-2-yl)but-2-en-1-yl)phenol (**3j**)

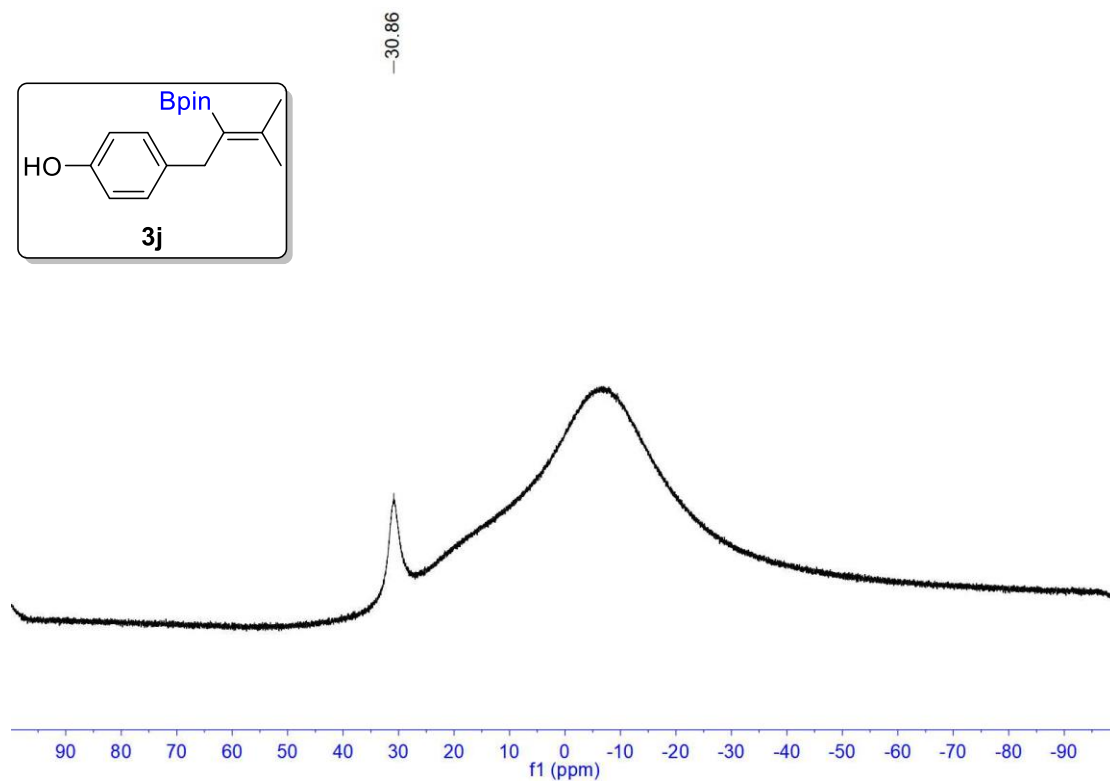

$^1\text{H}$  spectra ( $\text{CDCl}_3$ ) of 4,4,5,5-tetramethyl-2-(3-methyl-1-(4-(4,4,5,5-tetramethyl-1,3,2-dioxaborolan-2-yl)phenyl)but-2-en-2-yl)-1,3,2-dioxaborolane (**3k**)

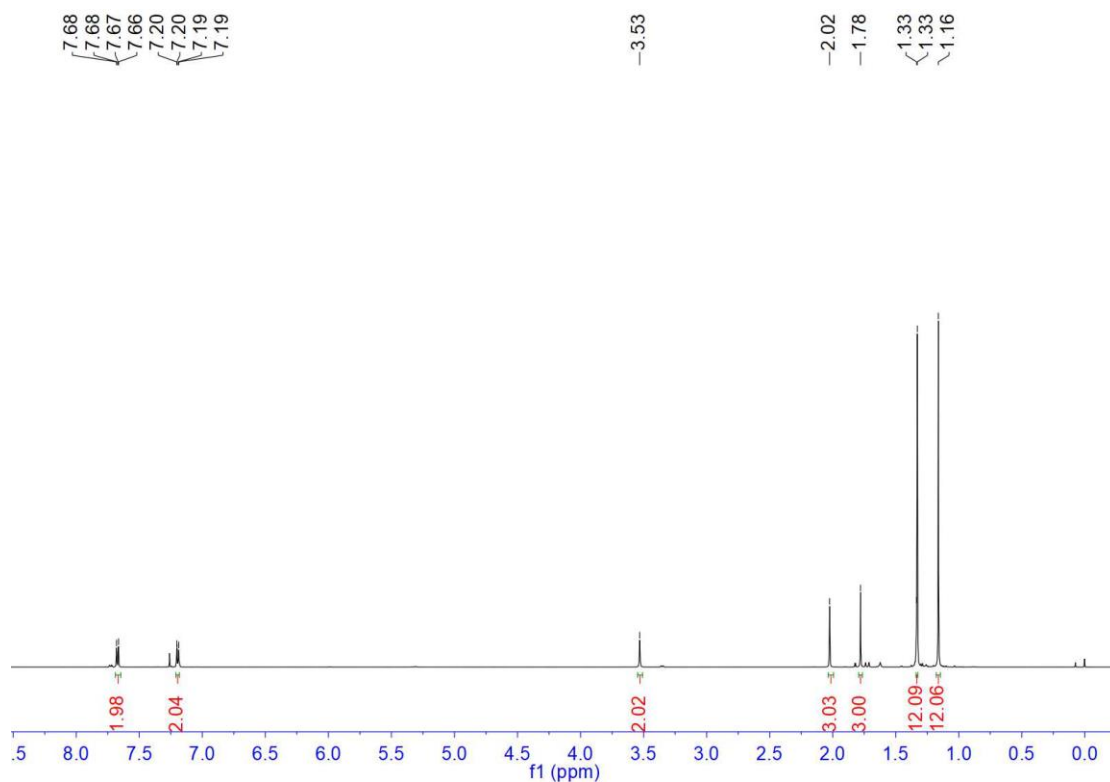

$^{13}\text{C}$  spectra ( $\text{CDCl}_3$ ) of 4,4,5,5-tetramethyl-2-(3-methyl-1-(4-(4,4,5,5-tetramethyl-1,3,2-dioxaborolan-2-yl)phenyl)but-2-en-2-yl)-1,3,2-dioxaborolane (**3k**)

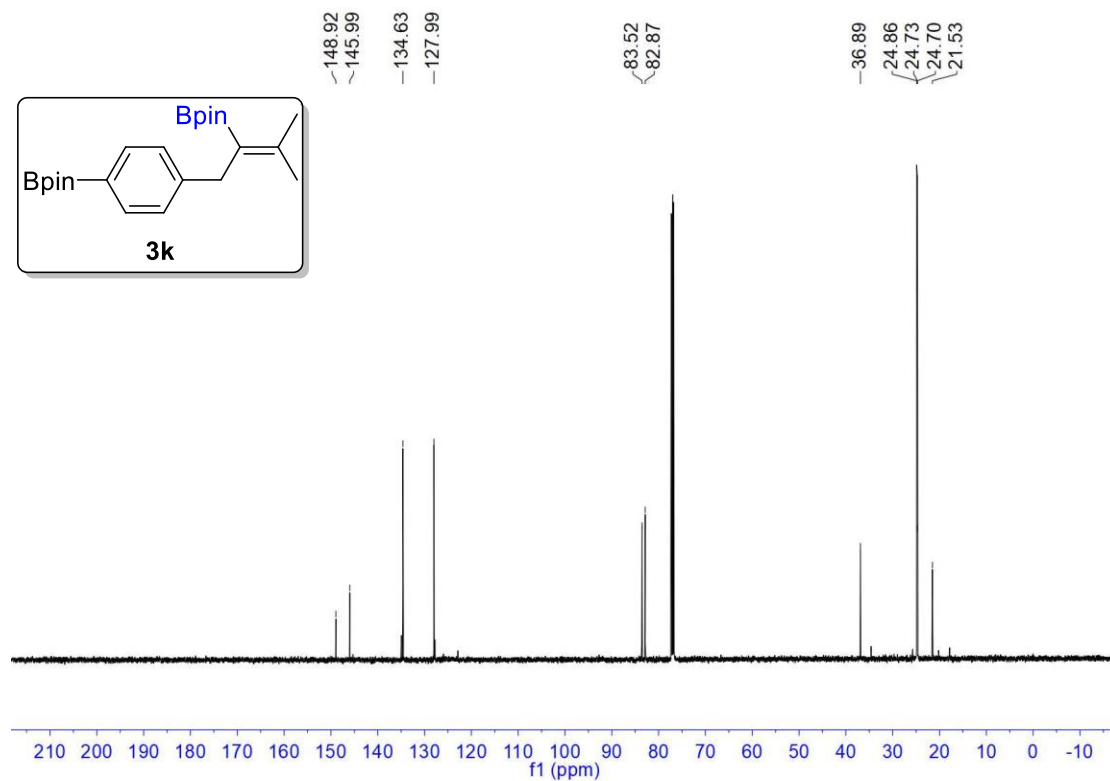

$^{11}\text{B}$  spectra ( $\text{CDCl}_3$ ) of 4,4,5,5-tetramethyl-2-(3-methyl-1-(4-(4,4,5,5-tetramethyl-1,3,2-dioxaborolan-2-yl)phenyl)but-2-en-2-yl)-1,3,2-dioxaborolane (**3k**)

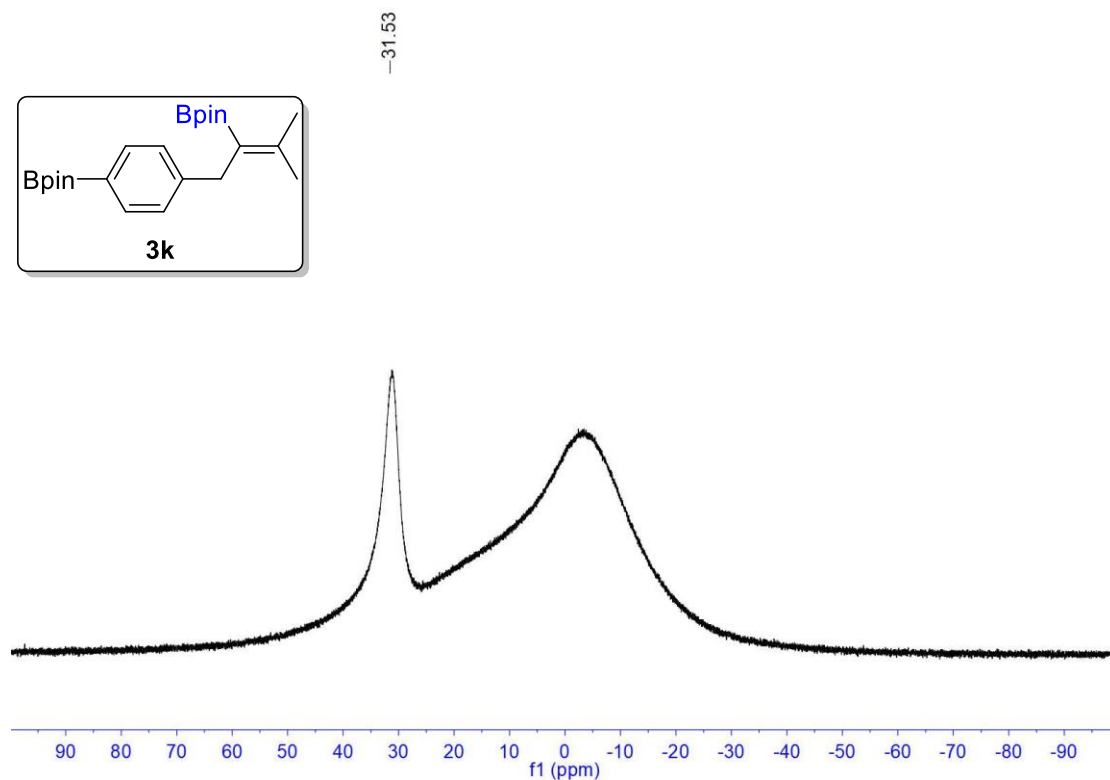

$^1\text{H}$  spectra ( $\text{CDCl}_3$ ) of 4,4,5,5-tetramethyl-2-(3-methyl-1-(4-(trifluoromethyl)phenyl)but-2-en-2-yl)-1,3,2-dioxaborolane (**3I**)

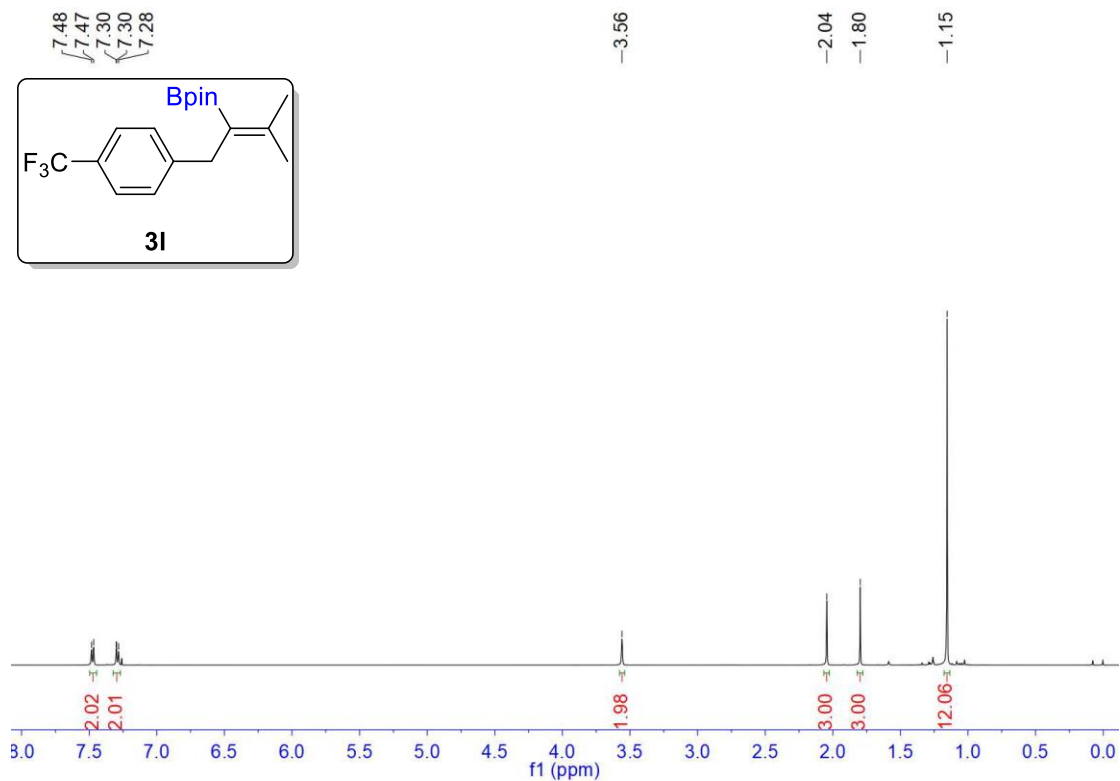

$^{13}\text{C}$  spectra ( $\text{CDCl}_3$ ) of 4,4,5,5-tetramethyl-2-(3-methyl-1-(4-(trifluoromethyl)phenyl)but-2-en-2-yl)-1,3,2-dioxaborolane (**3I**)

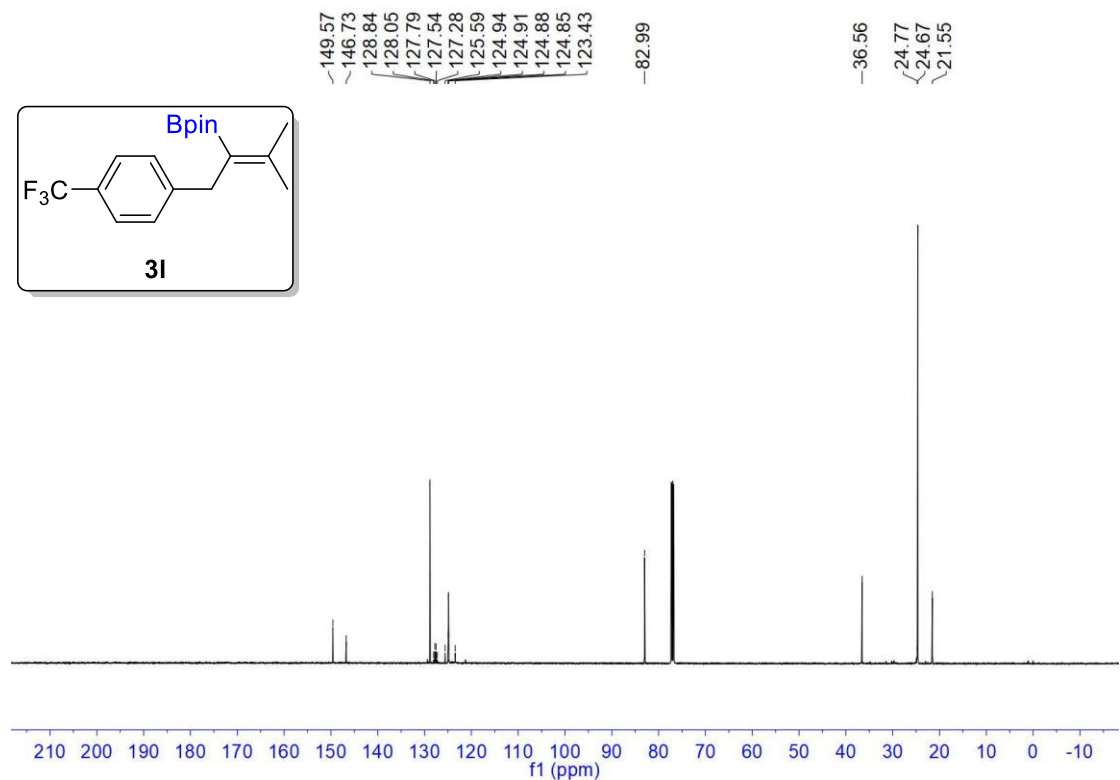



$^{19}\text{F}$  spectra ( $\text{CDCl}_3$ ) of 4,4,5,5-tetramethyl-2-(3-methyl-1-(4-(trifluoromethyl)phenyl)but-2-en-2-yl)-1,3,2-dioxaborolane (**31**)

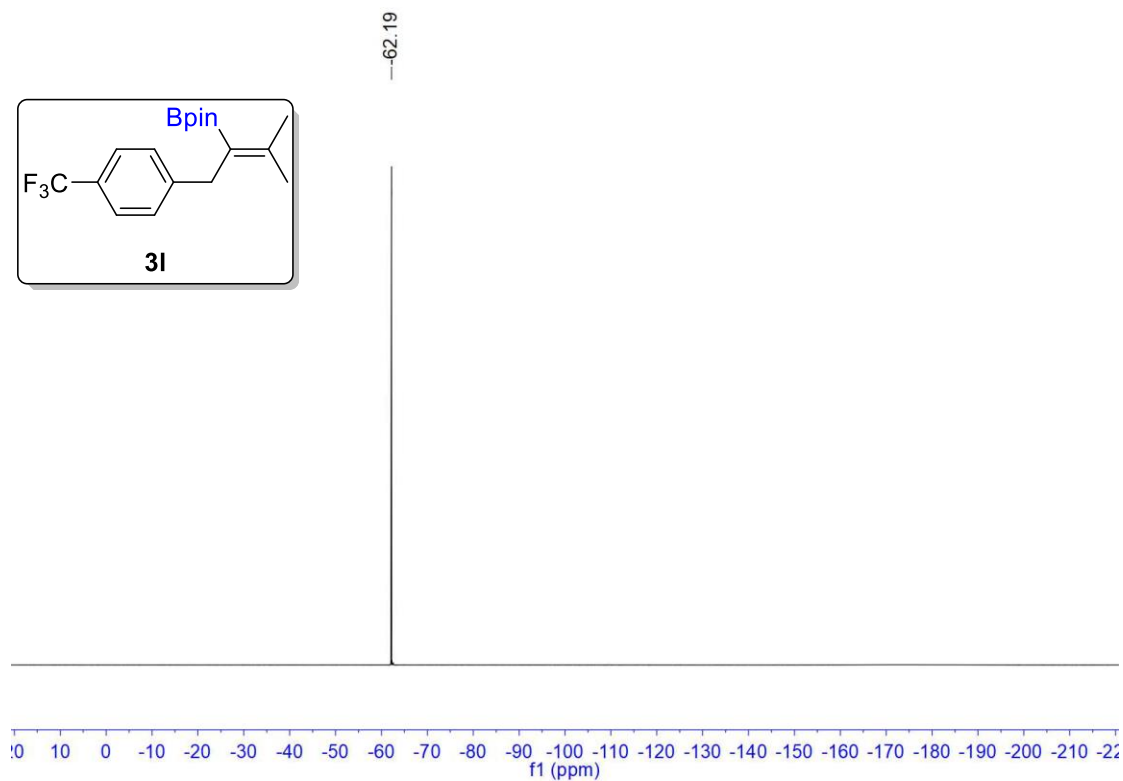

$^{11}\text{B}$  spectra ( $\text{CDCl}_3$ ) of 4,4,5,5-tetramethyl-2-(3-methyl-1-(4-(trifluoromethyl)phenyl)but-2-en-2-yl)-1,3,2-dioxaborolane (**31**)

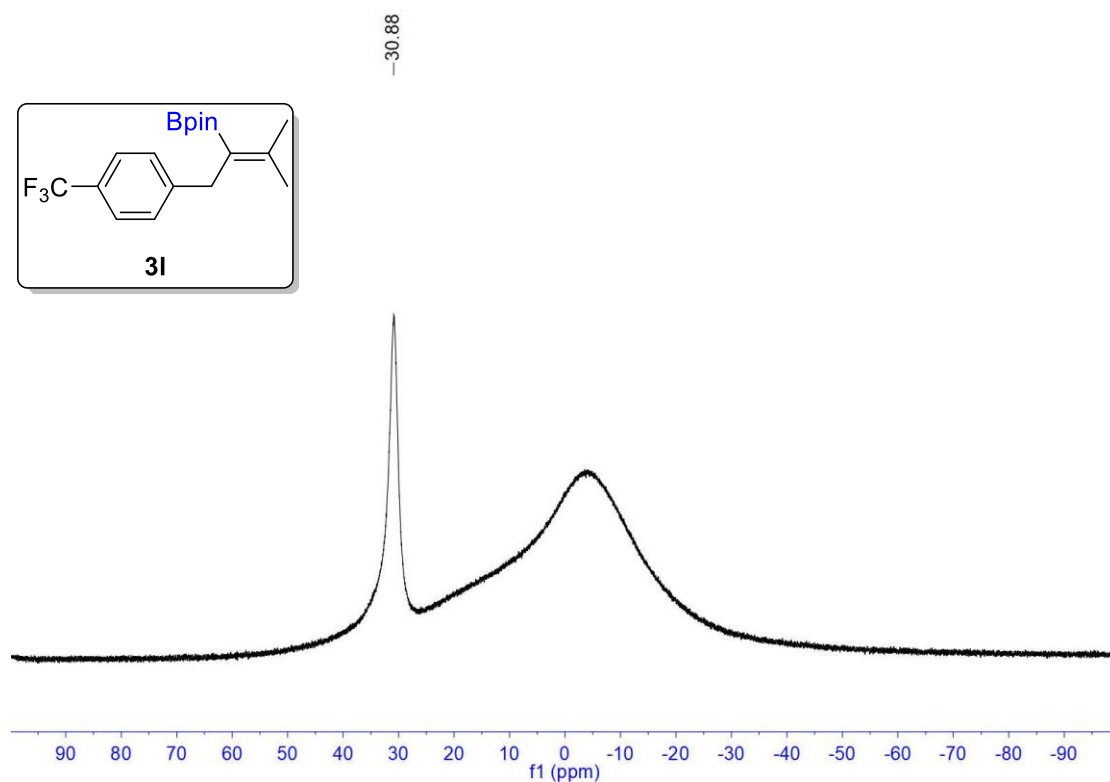

$^1\text{H}$  spectra ( $\text{CDCl}_3$ ) of 4-(3-methyl-2-(4,4,5,5-tetramethyl-1,3,2-dioxaborolan-2-yl)but-2-en-1-yl)phenyl 4-methylbenzenesulfonate (**3m**)

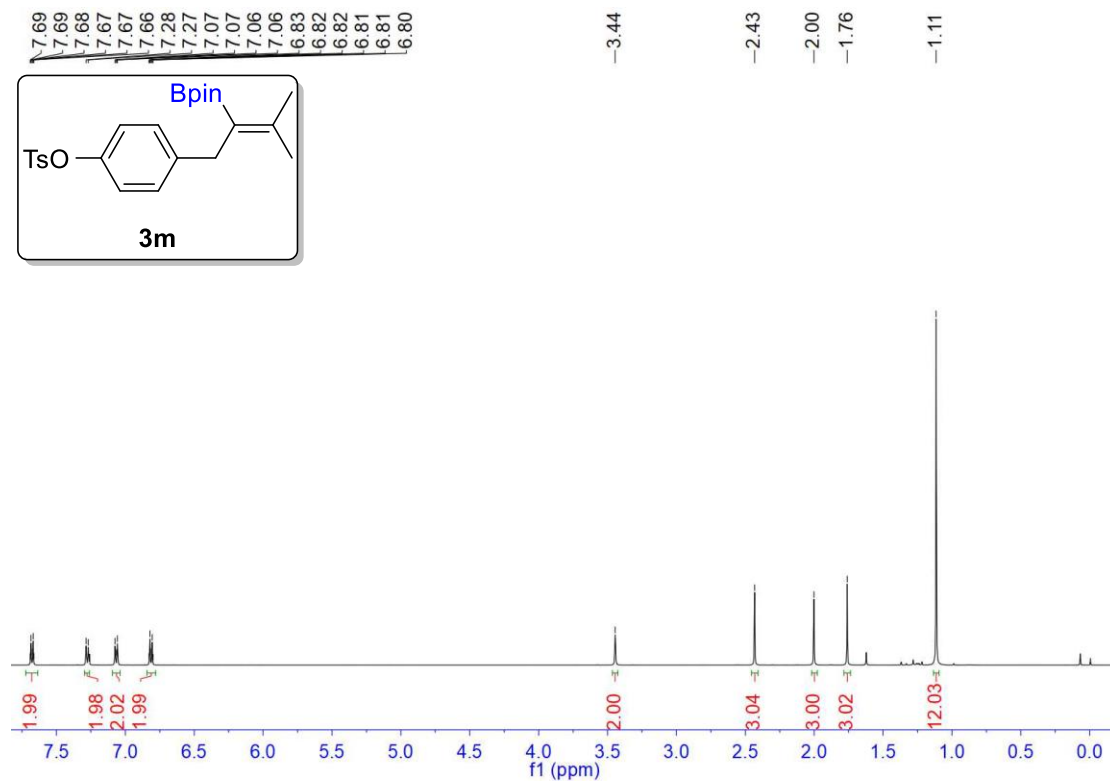

$^{13}\text{C}$  spectra ( $\text{CDCl}_3$ ) of 4-(3-methyl-2-(4,4,5,5-tetramethyl-1,3,2-dioxaborolan-2-yl)but-2-en-1-yl)phenyl 4-methylbenzenesulfonate (**3m**)

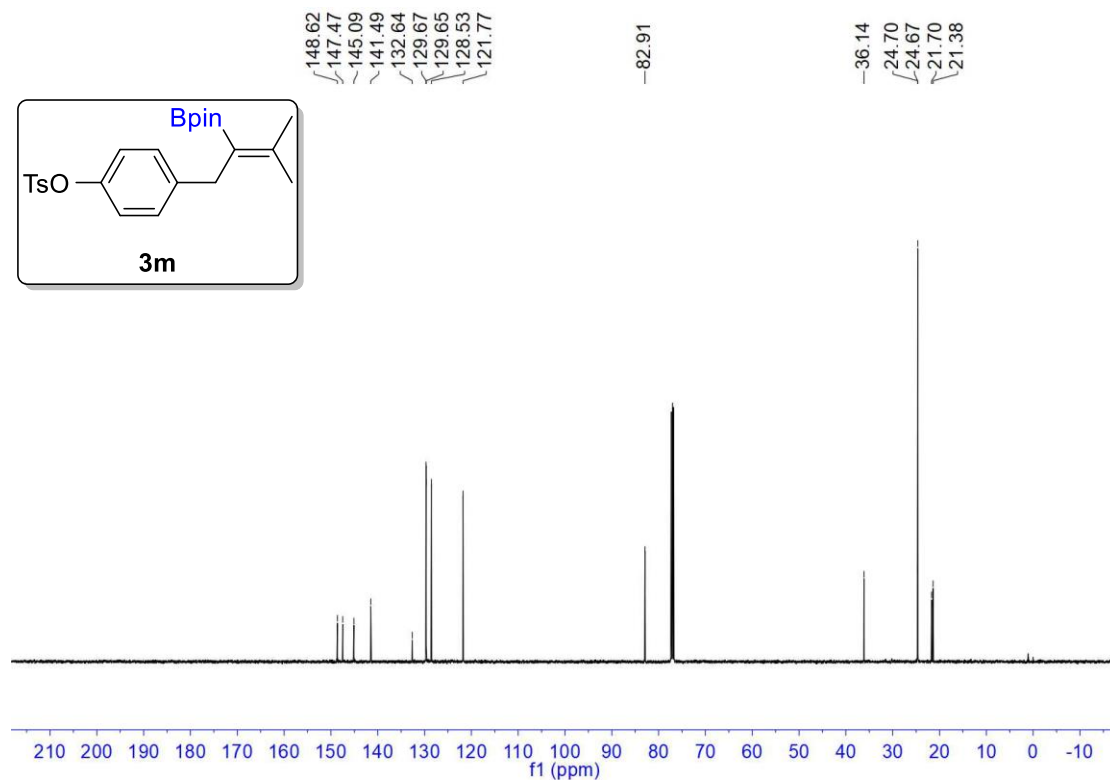

$^{11}\text{B}$  spectra ( $\text{CDCl}_3$ ) of 4-(3-methyl-2-(4,4,5,5-tetramethyl-1,3,2-dioxaborolan-2-yl)but-2-en-1-yl)phenyl 4-methylbenzenesulfonate (**3m**)

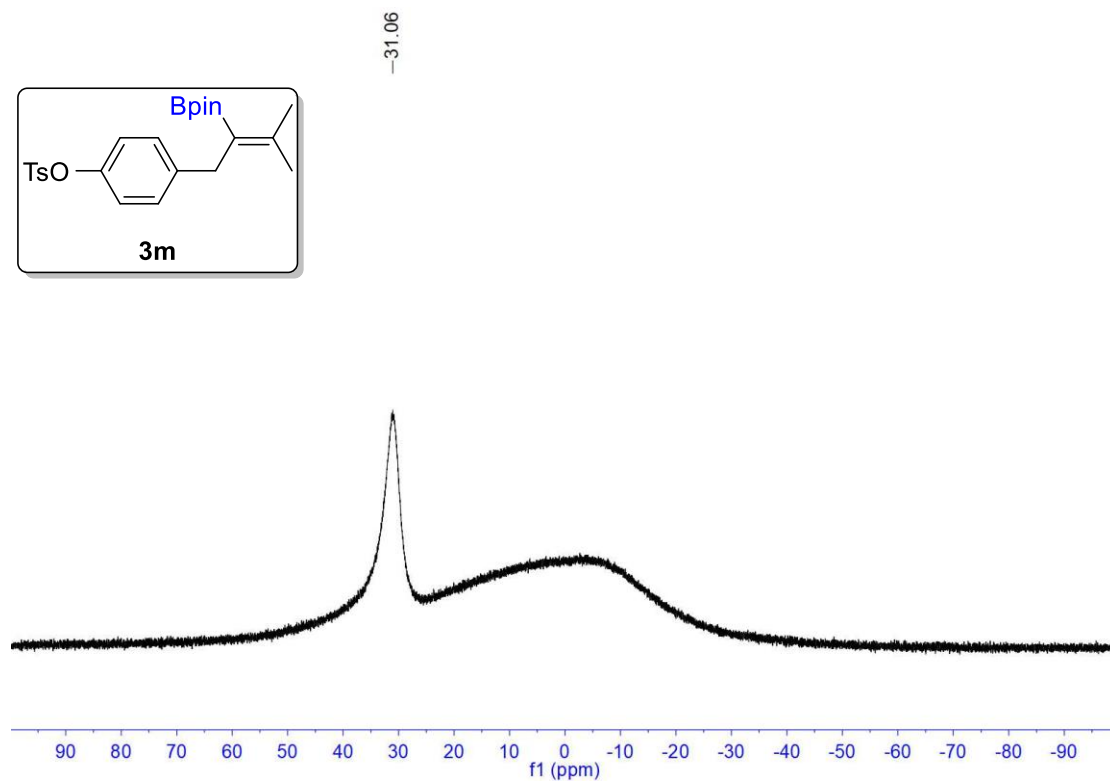

$^1\text{H}$  spectra ( $\text{CDCl}_3$ ) of 1-(4-(3-methyl-2-(4,4,5,5-tetramethyl-1,3,2-dioxaborolan-2-yl)but-2-en-1-yl)phenyl)ethan-1-one (**3n**)

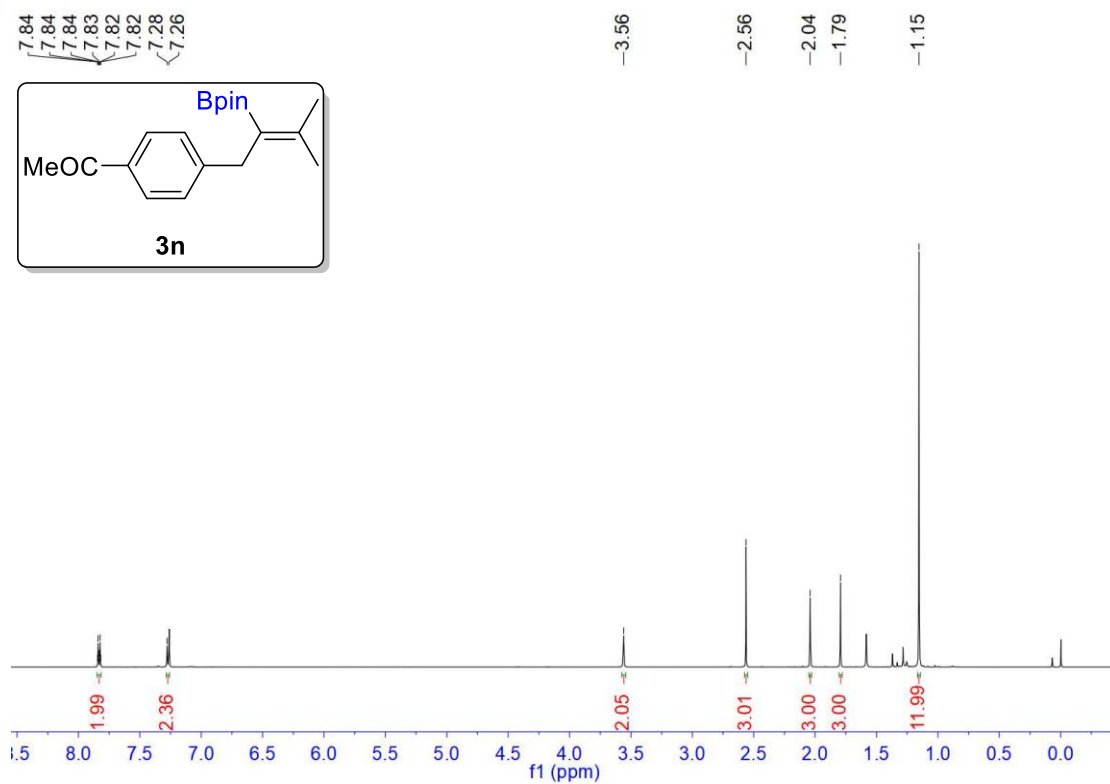

$^{13}\text{C}$  spectra ( $\text{CDCl}_3$ ) of 1-(4-(3-methyl-2-(4,4,5,5-tetramethyl-1,3,2-dioxaborolan-2-yl)but-2-en-1-yl)phenyl)ethan-1-one (**3n**)

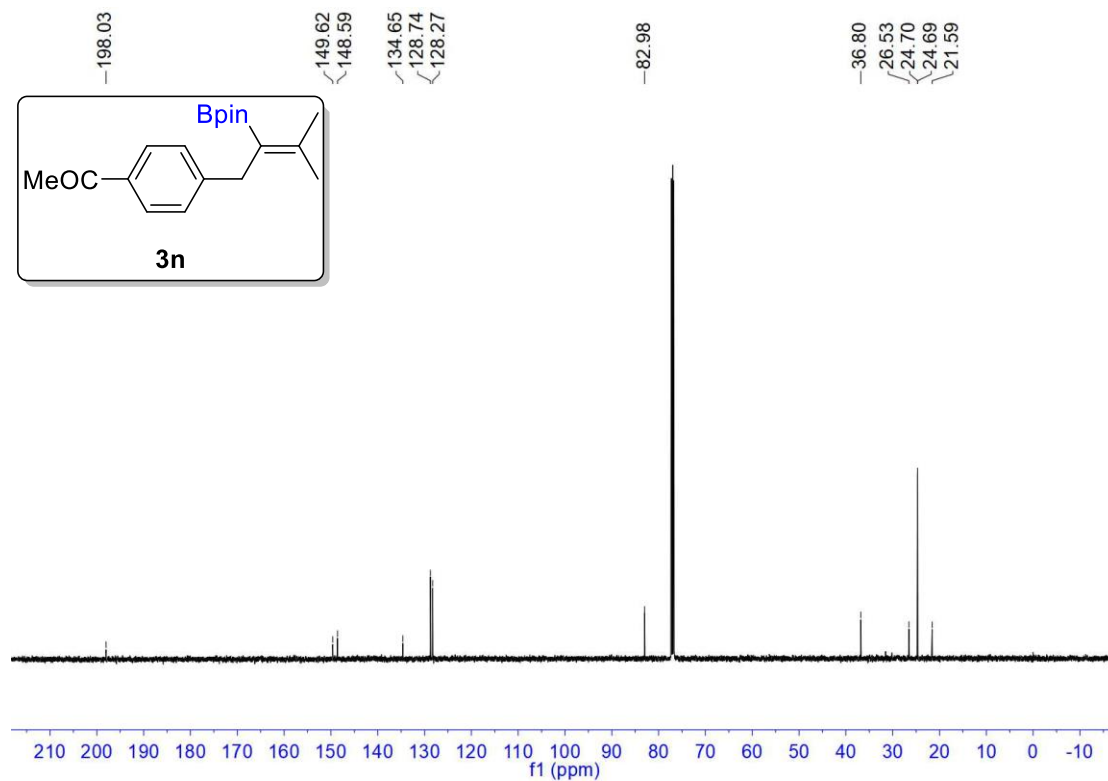

$^{11}\text{B}$  spectra ( $\text{CDCl}_3$ ) of 1-(4-(3-methyl-2-(4,4,5,5-tetramethyl-1,3,2-dioxaborolan-2-yl)but-2-en-1-yl)phenyl)ethan-1-one (**3n**)

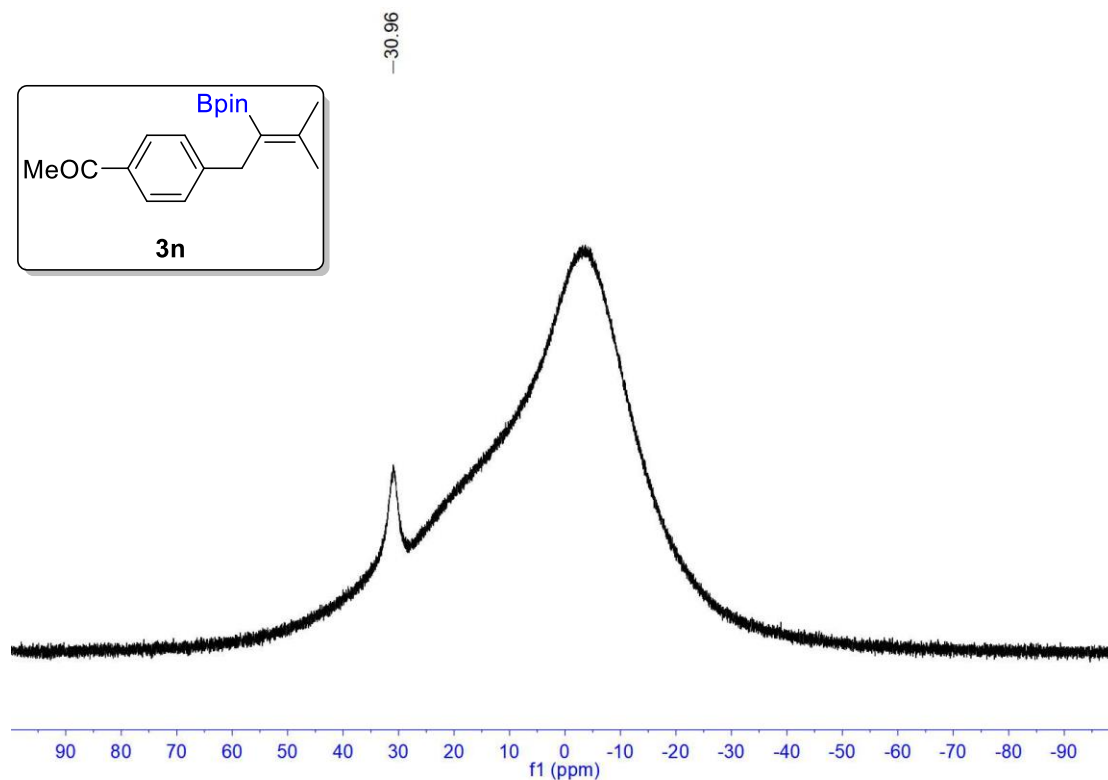

$^1\text{H}$  spectra ( $\text{CDCl}_3$ ) of 4,4,5,5-tetramethyl-2-(3-methyl-1-(4-(trifluoromethoxy)phenyl)but-2-en-2-yl)-1,3,2-dioxaborolane (**3o**)

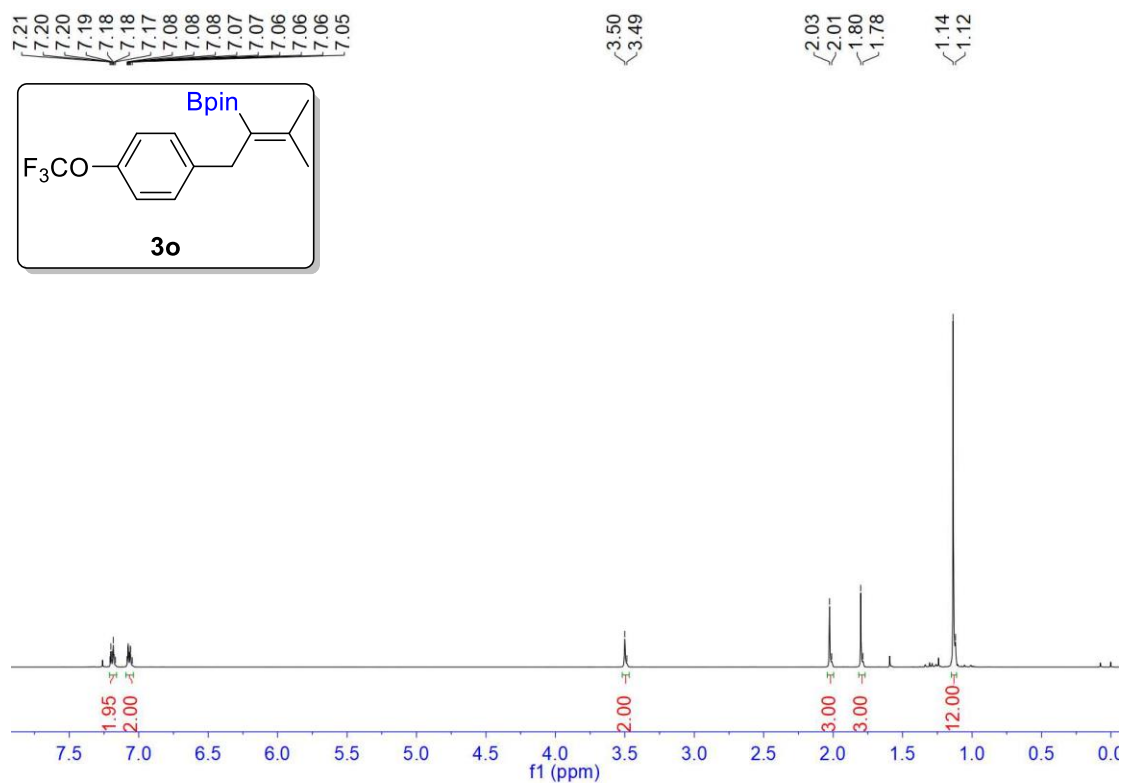

$^{13}\text{C}$  spectra ( $\text{CDCl}_3$ ) of 4,4,5,5-tetramethyl-2-(3-methyl-1-(4-(trifluoromethoxy)phenyl)but-2-en-2-yl)-1,3,2-dioxaborolane (**3o**)

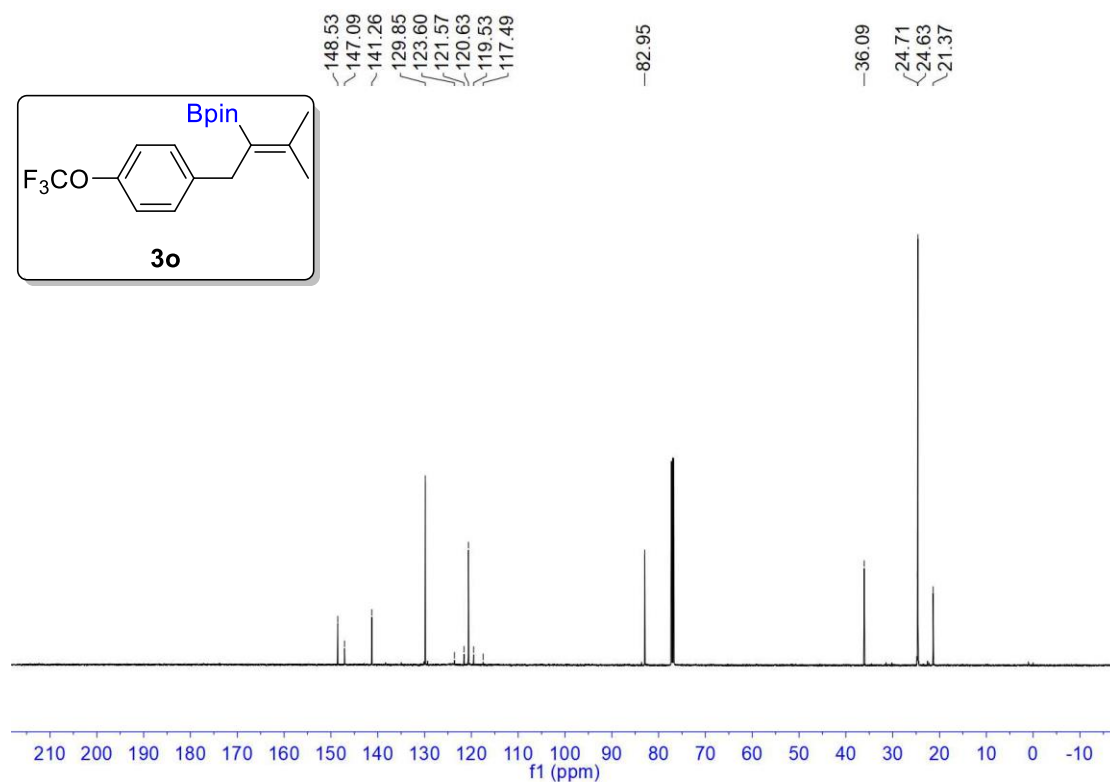

$^{19}\text{F}$  spectra ( $\text{CDCl}_3$ ) of 4,4,5,5-tetramethyl-2-(3-methyl-1-(4-(trifluoromethoxy)phenyl)but-2-en-2-yl)-1,3,2-dioxaborolane (**3o**)

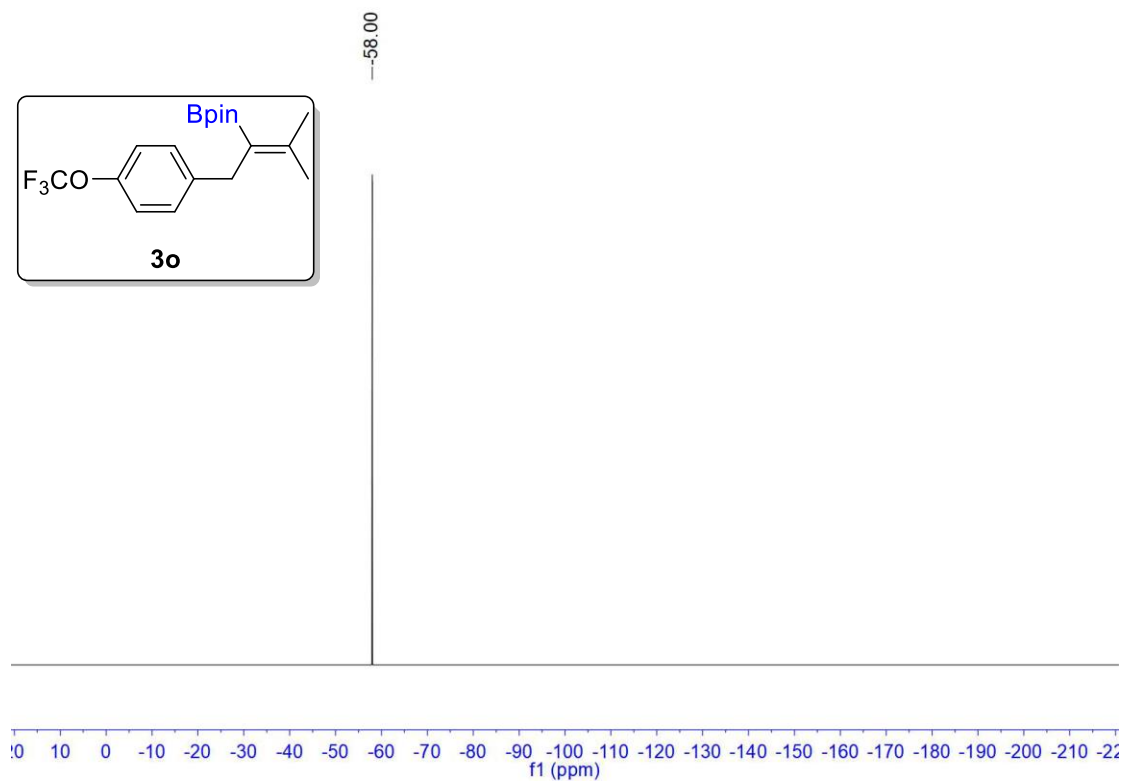

$^{11}\text{B}$  spectra ( $\text{CDCl}_3$ ) of 4,4,5,5-tetramethyl-2-(3-methyl-1-(4-(trifluoromethoxy)phenyl)but-2-en-2-yl)-1,3,2-dioxaborolane (**3o**)

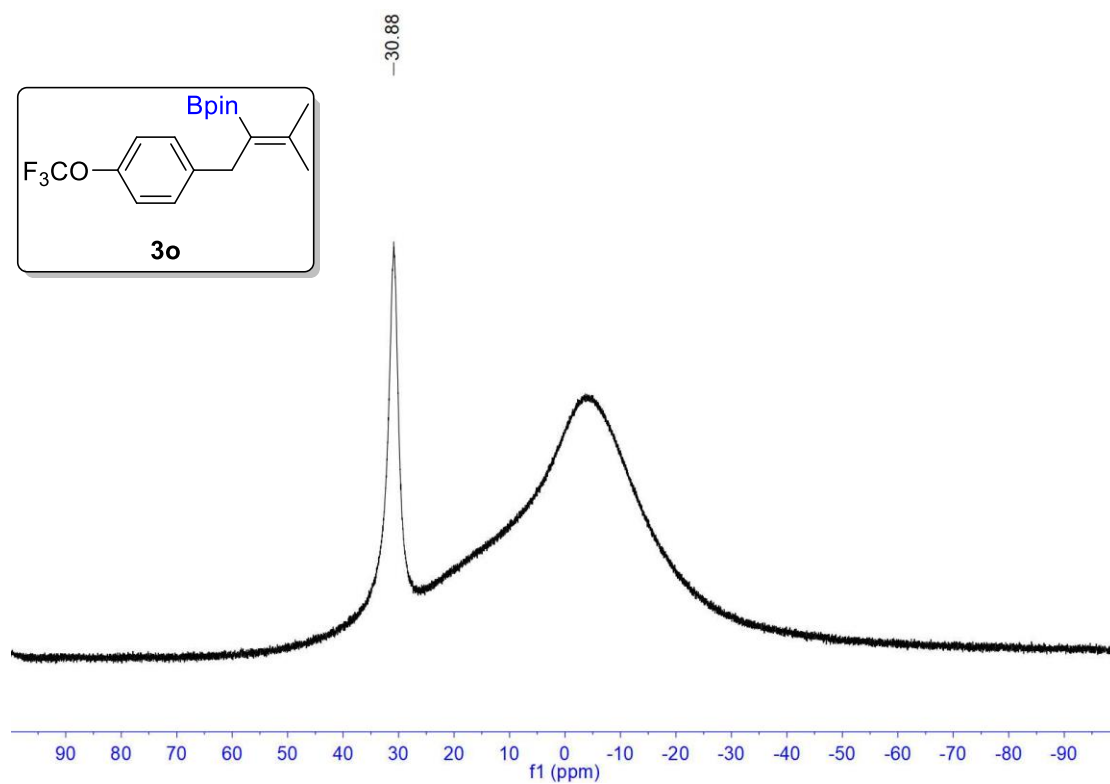

$^1\text{H}$  spectra ( $\text{CDCl}_3$ ) of 2-(1-(4-methoxyphenyl)-3-methylbut-2-en-2-yl)-4,4,5,5-tetramethyl-1,3,2-dioxaborolane (**3p**)

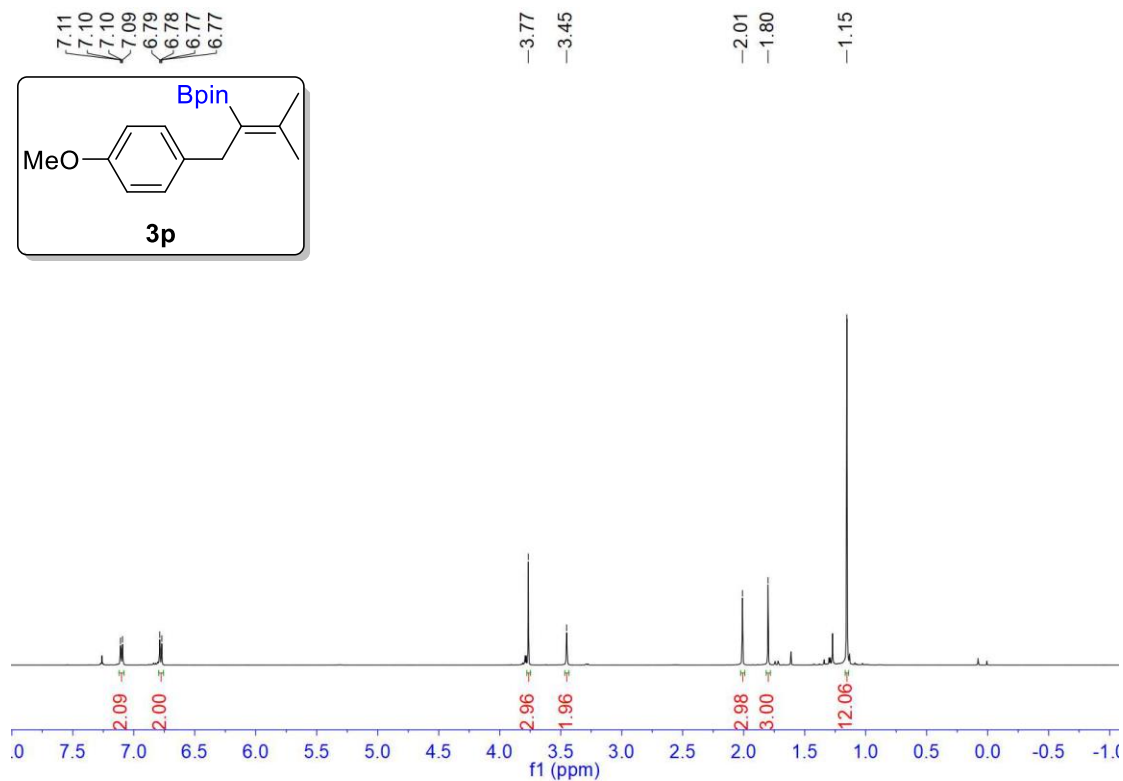

$^{13}\text{C}$  spectra ( $\text{CDCl}_3$ ) of 2-(1-(4-methoxyphenyl)-3-methylbut-2-en-2-yl)-4,4,5,5-tetramethyl-1,3,2-dioxaborolane (**3p**)

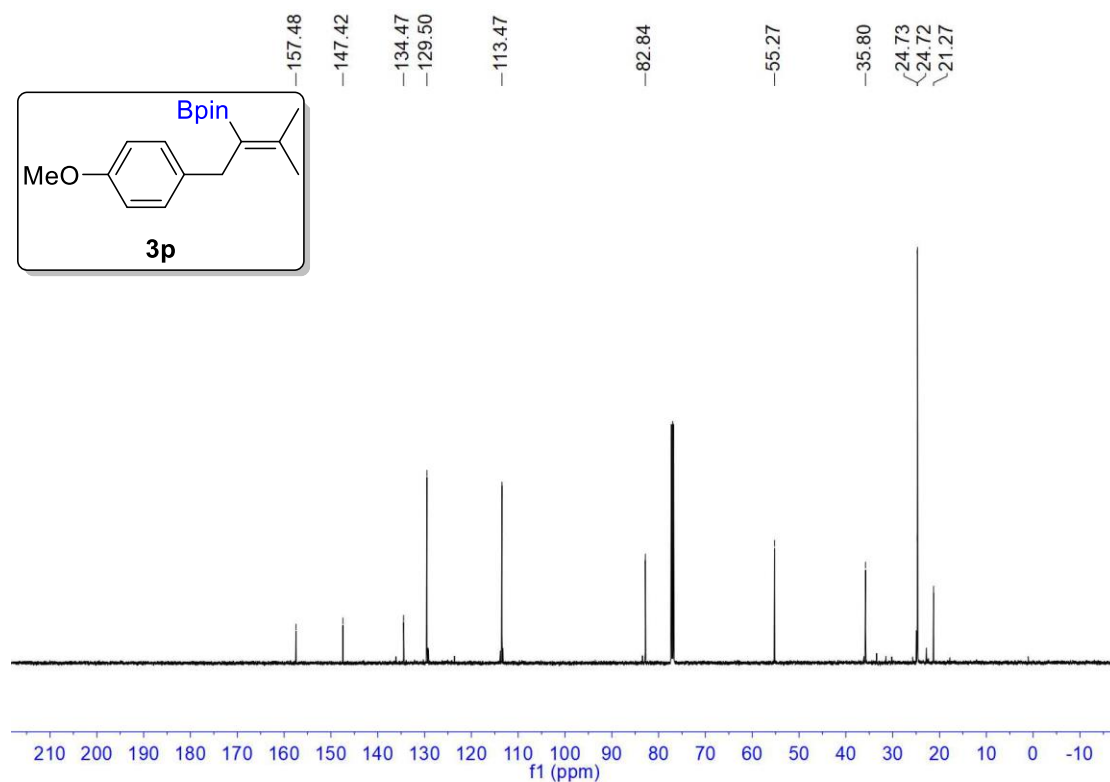

$^{11}\text{B}$  spectra ( $\text{CDCl}_3$ ) of 2-(1-(4-methoxyphenyl)-3-methylbut-2-en-2-yl)-4,4,5,5-tetramethyl-1,3,2-dioxaborolane (**3p**)

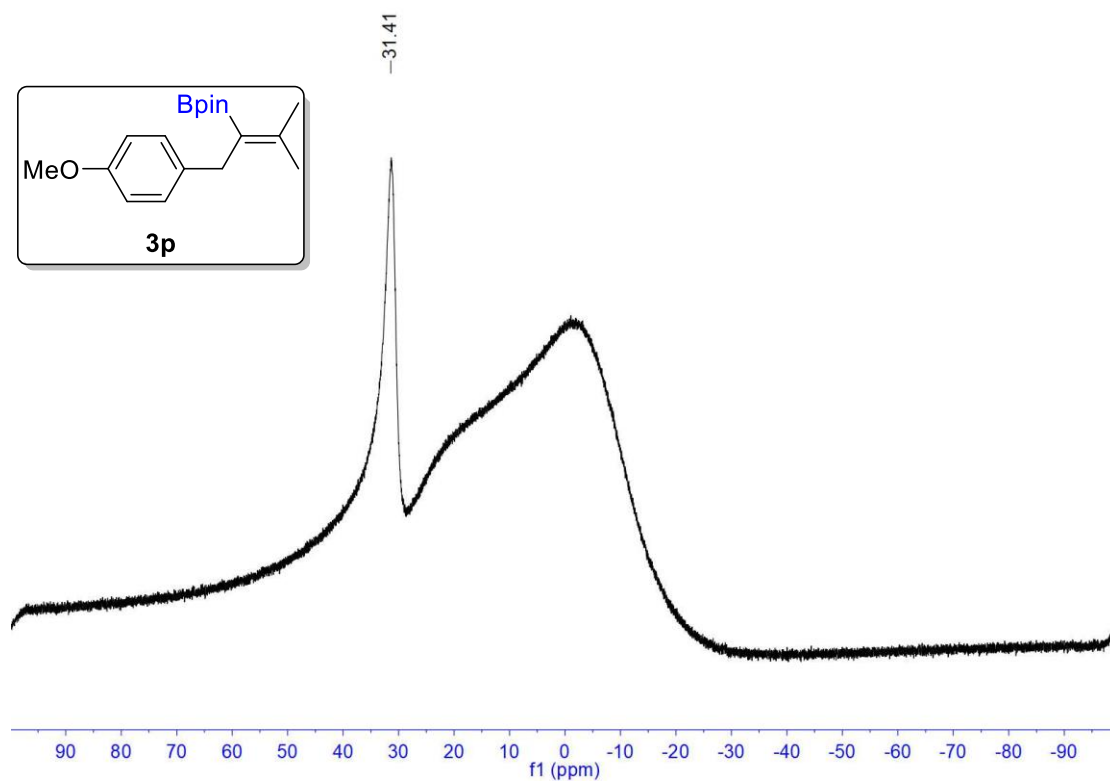

$^1\text{H}$  spectra ( $\text{CDCl}_3$ ) of N,N-dimethyl-4-(3-methyl-2-(4,4,5,5-tetramethyl-1,3,2-dioxaborolan-2-yl)but-2-en-1-yl)aniline (**3q**)

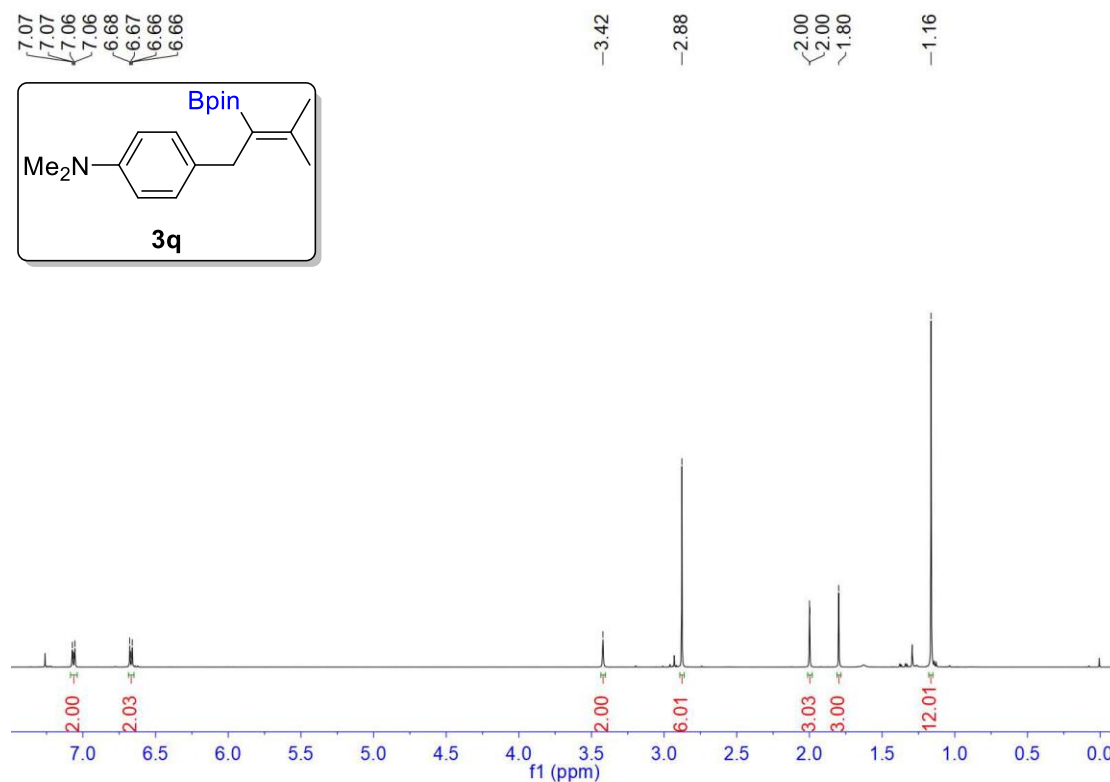



$^{13}\text{C}$  spectra ( $\text{CDCl}_3$ ) of *N,N*-dimethyl-4-(3-methyl-2-(4,4,5,5-tetramethyl-1,3,2-dioxaborolan-2-yl)but-2-en-1-yl)aniline (**3q**)

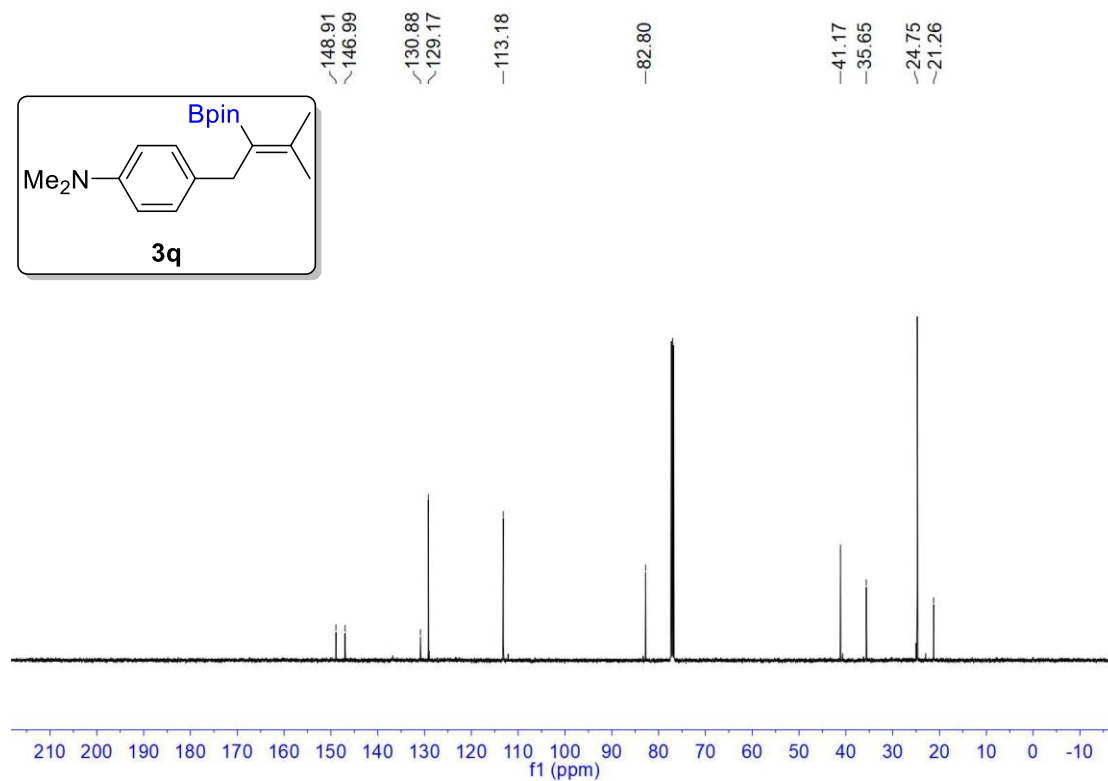

$^{11}\text{B}$  spectra ( $\text{CDCl}_3$ ) of *N,N*-dimethyl-4-(3-methyl-2-(4,4,5,5-tetramethyl-1,3,2-dioxaborolan-2-yl)but-2-en-1-yl)aniline (**3q**)

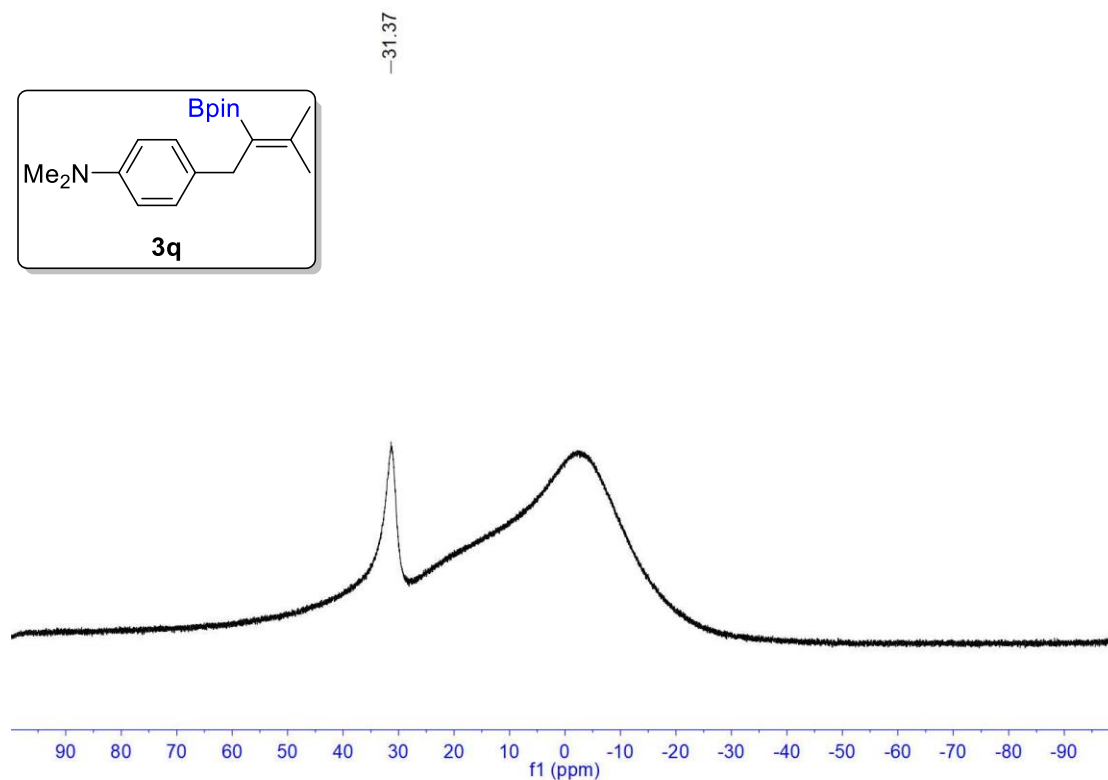

$^1\text{H}$  spectra ( $\text{CDCl}_3$ ) of 2-(1-(3-fluorophenyl)-3-methylbut-2-en-2-yl)-4,4,5,5-tetramethyl-1,3,2-dioxaborolane (**3r**)

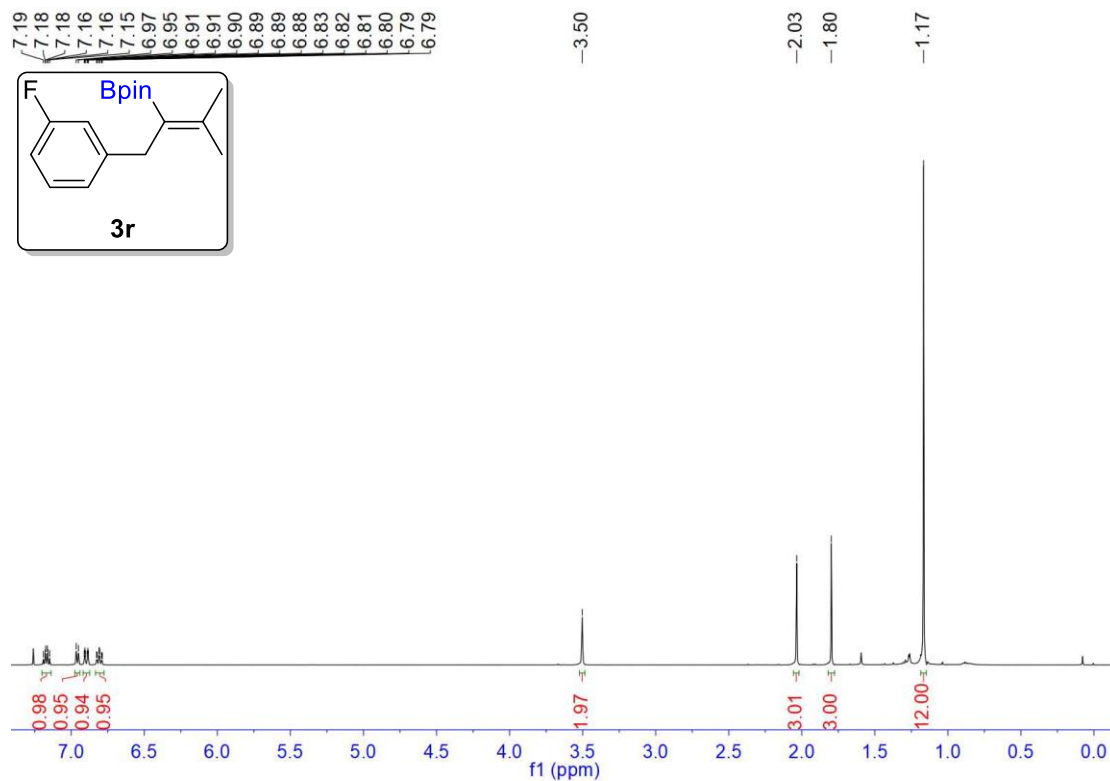

$^{13}\text{C}$  spectra ( $\text{CDCl}_3$ ) of 2-(1-(3-fluorophenyl)-3-methylbut-2-en-2-yl)-4,4,5,5-tetramethyl-1,3,2-dioxaborolane (**3r**)

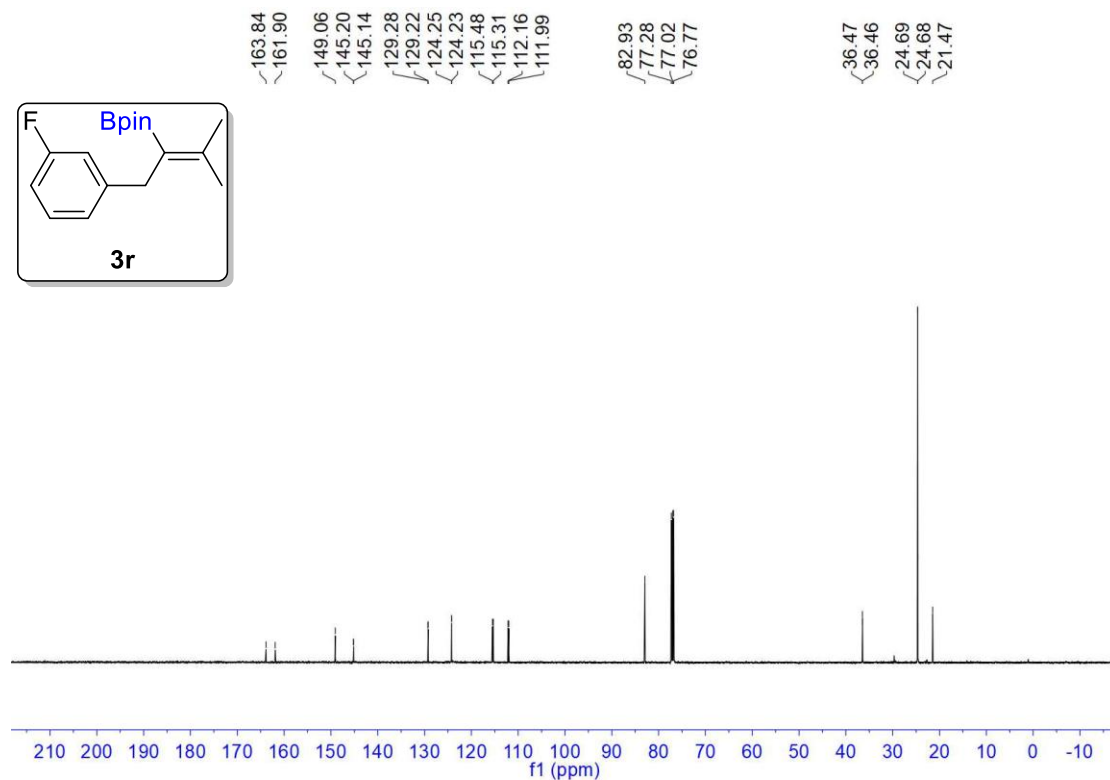

$^{19}\text{F}$  spectra ( $\text{CDCl}_3$ ) of 2-(1-(3-fluorophenyl)-3-methylbut-2-en-2-yl)-4,4,5,5-tetramethyl-1,3,2-dioxaborolane (**3r**)

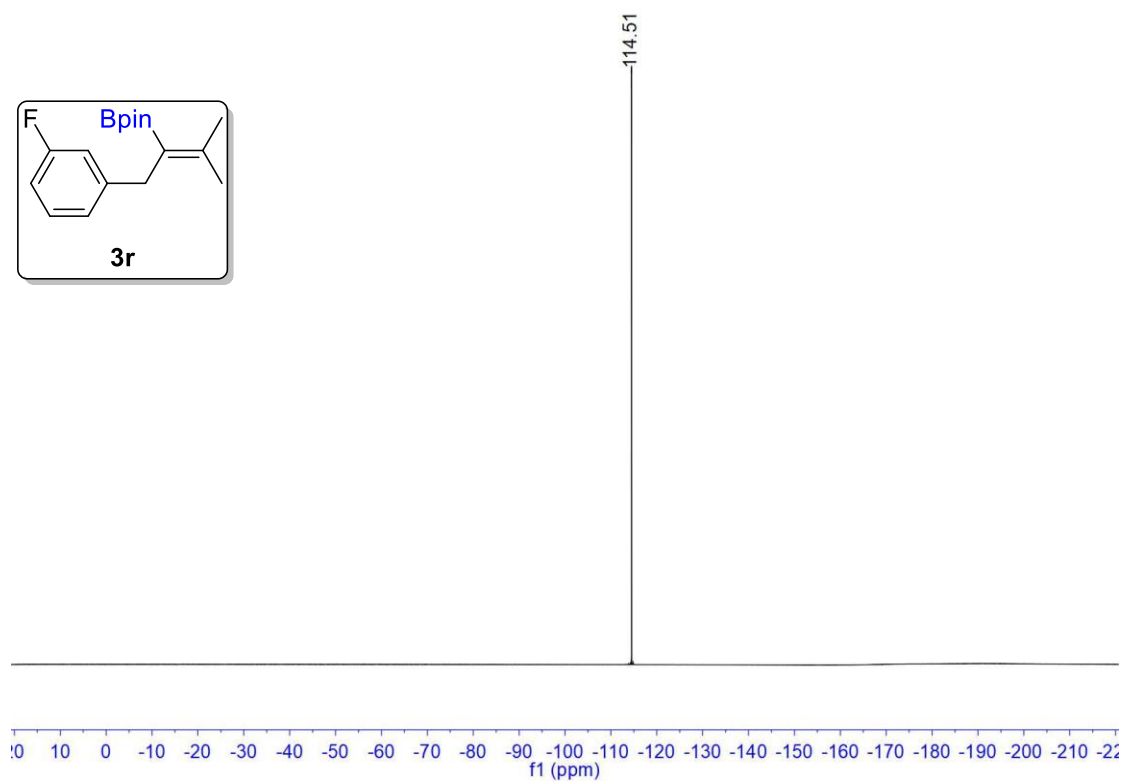

$^{11}\text{B}$  spectra ( $\text{CDCl}_3$ ) of 2-(1-(3-fluorophenyl)-3-methylbut-2-en-2-yl)-4,4,5,5-tetramethyl-1,3,2-dioxaborolane (**3r**)

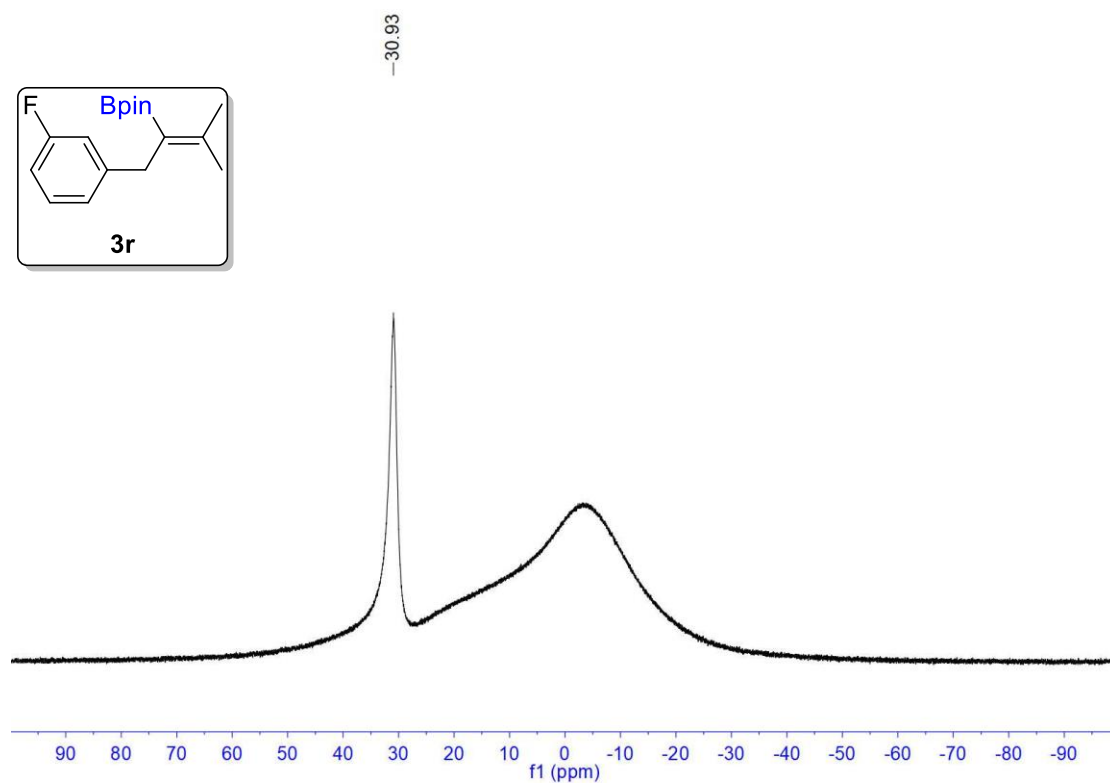

$^1\text{H}$  spectra ( $\text{CDCl}_3$ ) of 2-(1-(3-bromophenyl)-3-methylbut-2-en-2-yl)-4,4,5,5-tetramethyl-1,3,2-dioxaborolane (**3s**)

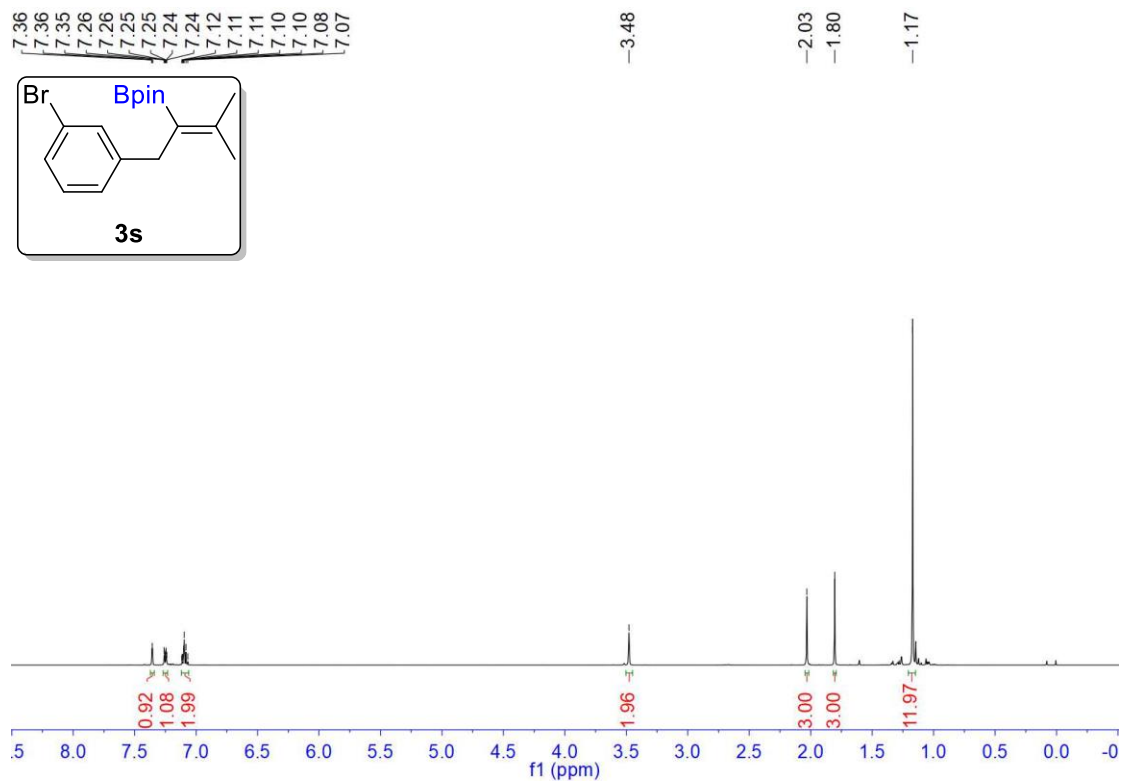

$^{13}\text{C}$  spectra ( $\text{CDCl}_3$ ) of 2-(1-(3-bromophenyl)-3-methylbut-2-en-2-yl)-4,4,5,5-tetramethyl-1,3,2-dioxaborolane (**3s**)

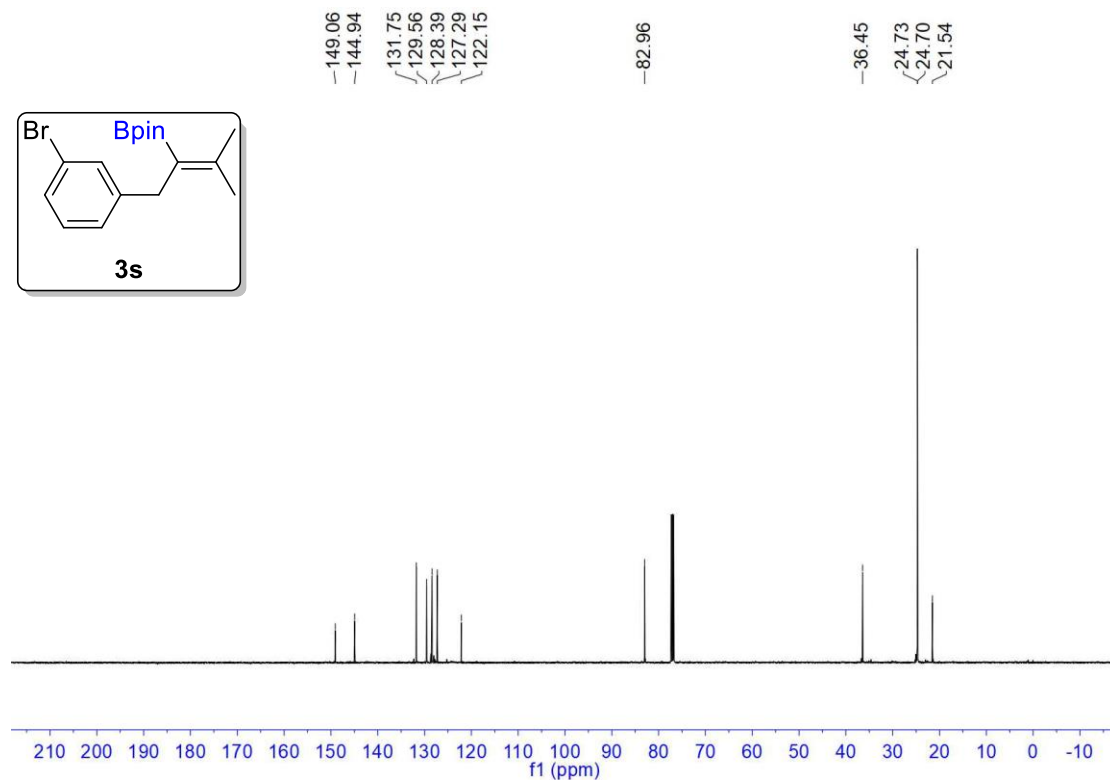

$^{11}\text{B}$  spectra ( $\text{CDCl}_3$ ) of 2-(1-(3-bromophenyl)-3-methylbut-2-en-2-yl)-4,4,5,5-tetramethyl-1,3,2-dioxaborolane (**3s**)

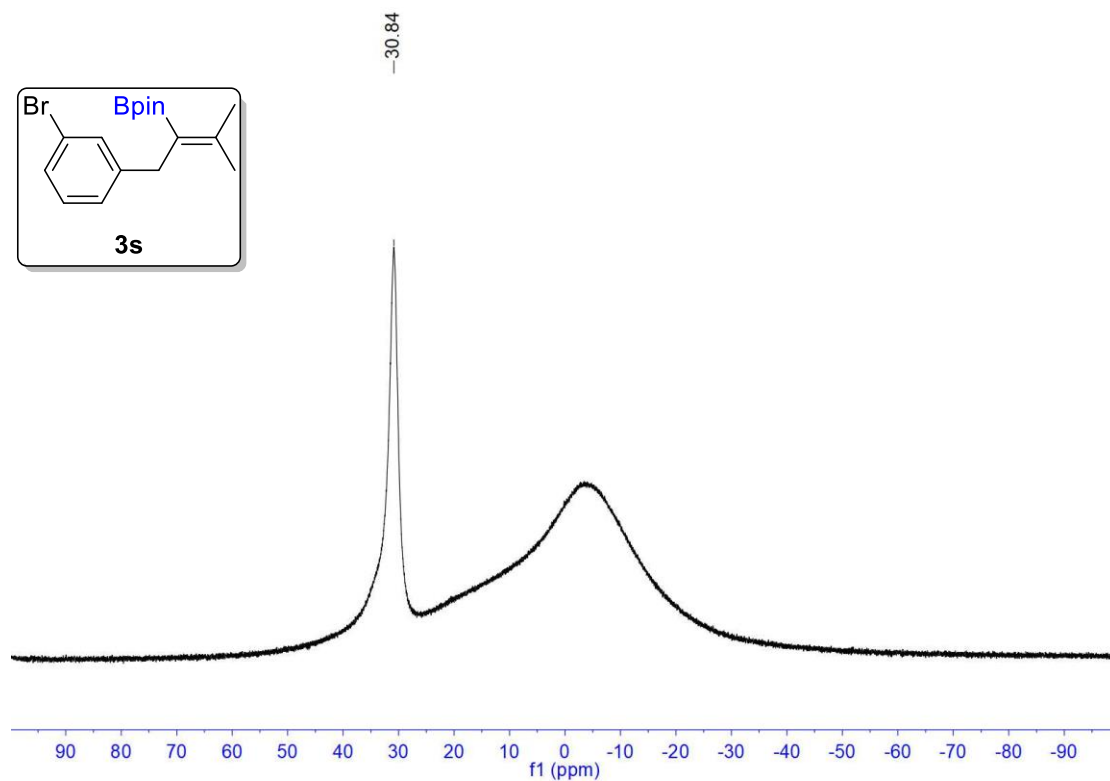

$^1\text{H}$  spectra ( $\text{CDCl}_3$ ) of 2-(1-(3-methoxyphenyl)-3-methylbut-2-en-2-yl)-4,4,5,5-tetramethyl-1,3,2-dioxaborolane (**3t**)

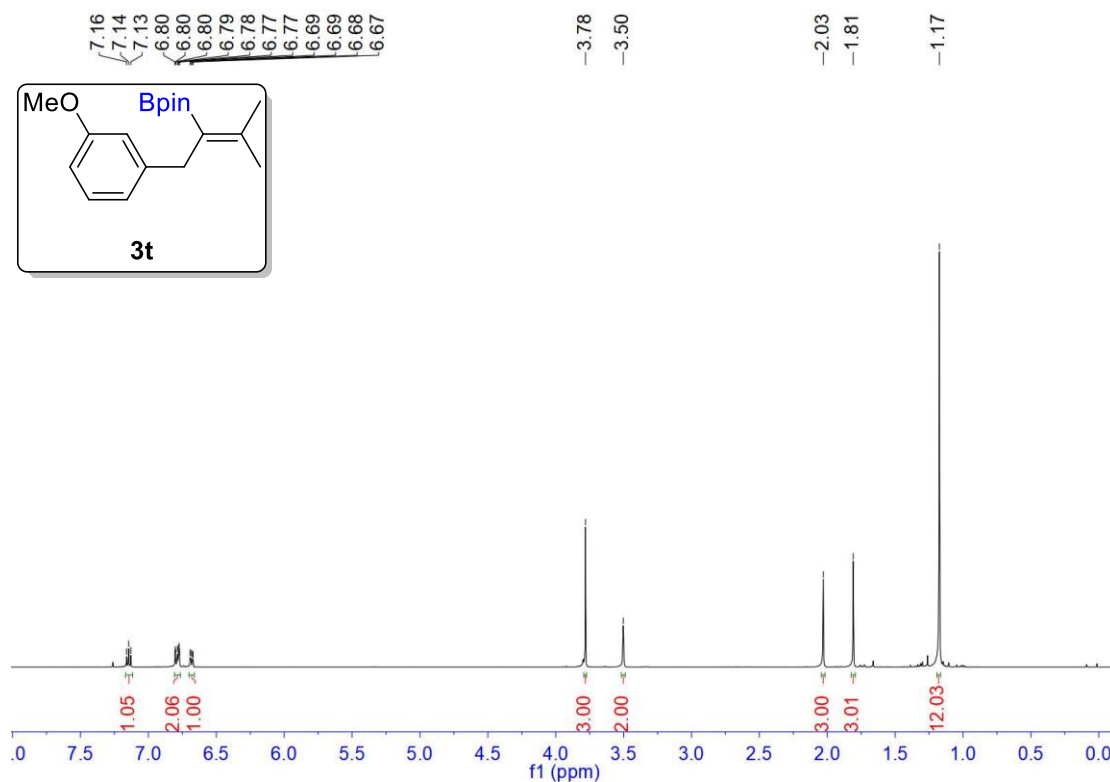

$^{13}\text{C}$  spectra ( $\text{CDCl}_3$ ) of 2-(1-(3-methoxyphenyl)-3-methylbut-2-en-2-yl)-4,4,5,5-tetramethyl-1,3,2-dioxaborolane (**3t**)

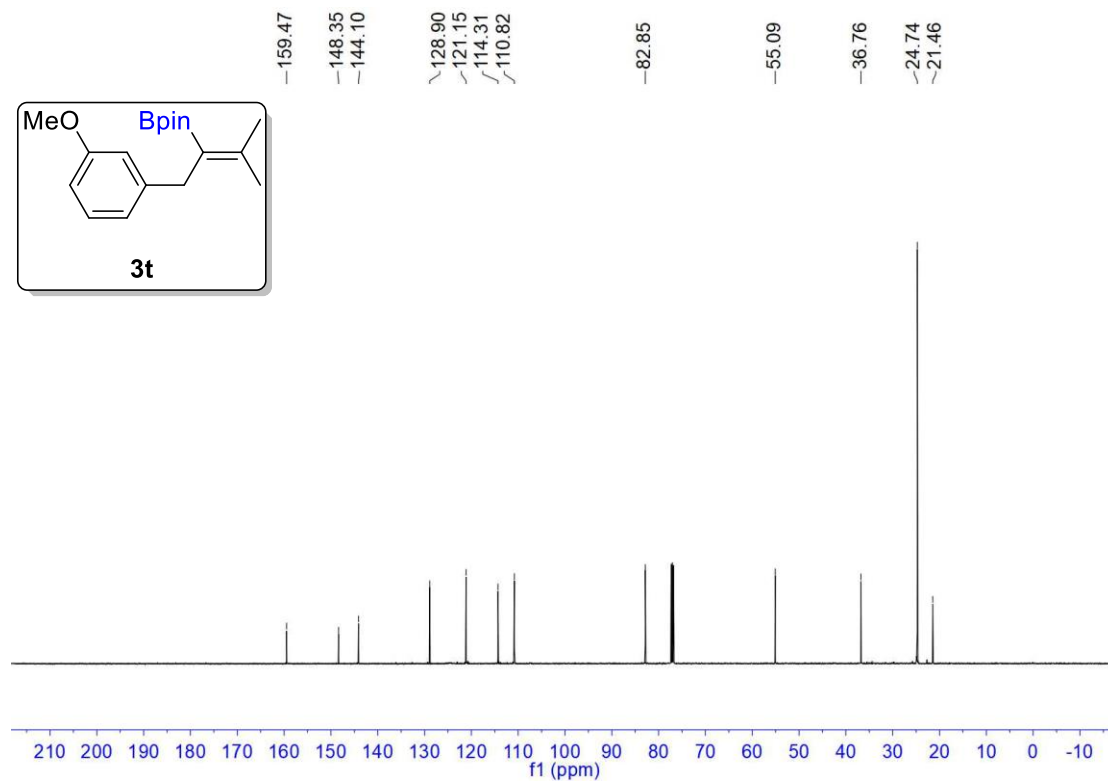

$^{11}\text{B}$  spectra ( $\text{CDCl}_3$ ) of 2-(1-(3-methoxyphenyl)-3-methylbut-2-en-2-yl)-4,4,5,5-tetramethyl-1,3,2-dioxaborolane (**3t**)

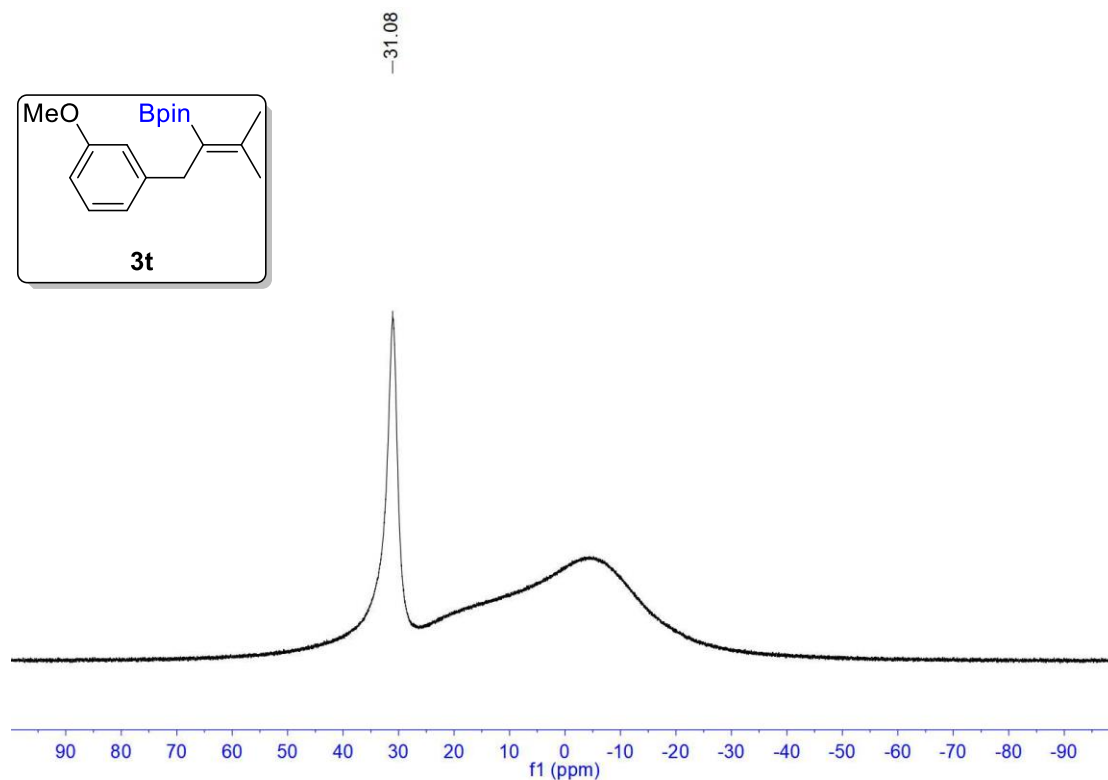

$^1\text{H}$  spectra ( $\text{CDCl}_3$ ) of 3-(3-methyl-2-(4,4,5,5-tetramethyl-1,3,2-dioxaborolan-2-yl)but-2-en-1-yl)benzonitrile (**3u**)

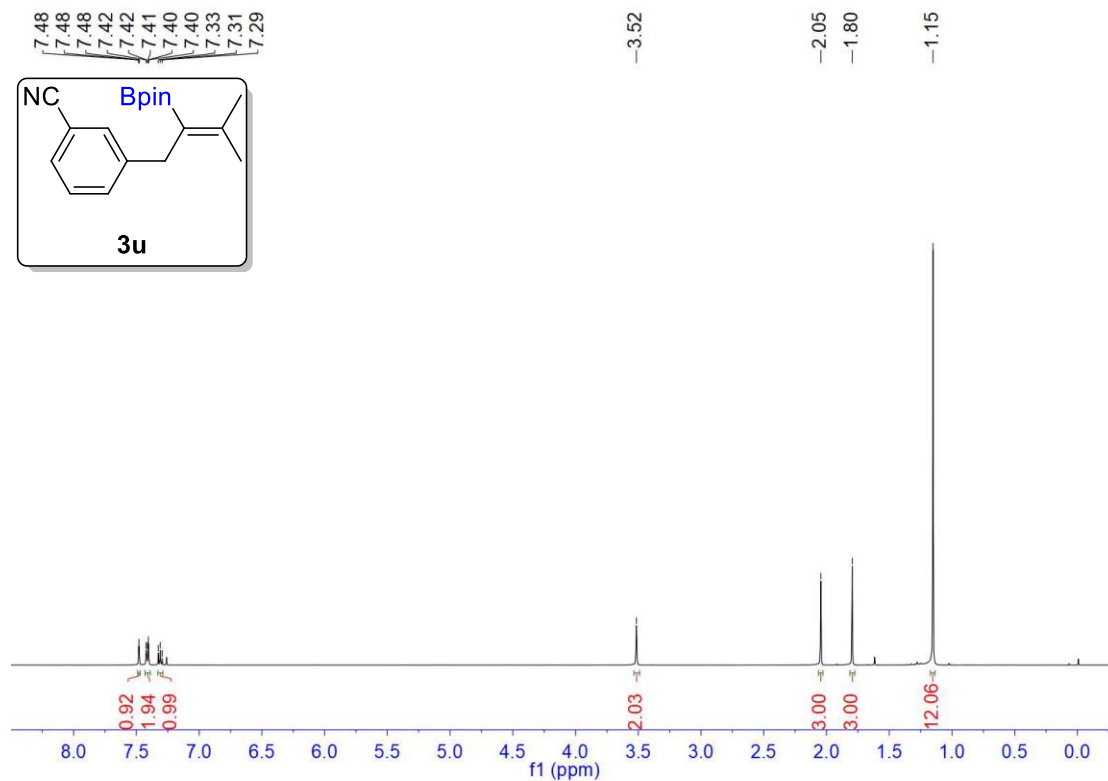

$^{13}\text{C}$  spectra ( $\text{CDCl}_3$ ) of 3-(3-methyl-2-(4,4,5,5-tetramethyl-1,3,2-dioxaborolan-2-yl)but-2-en-1-yl)benzonitrile (**3u**)

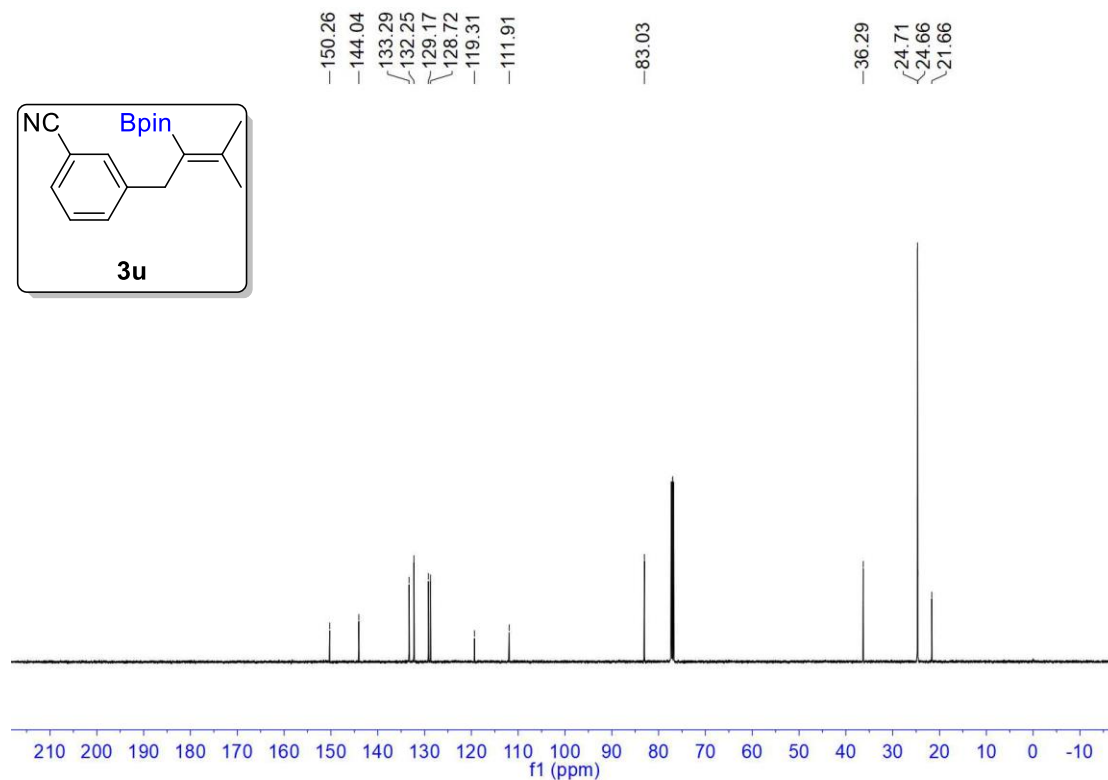

$^{11}\text{B}$  spectra ( $\text{CDCl}_3$ ) of 3-(3-methyl-2-(4,4,5,5-tetramethyl-1,3,2-dioxaborolan-2-yl)but-2-en-1-yl)benzonitrile (**3u**)

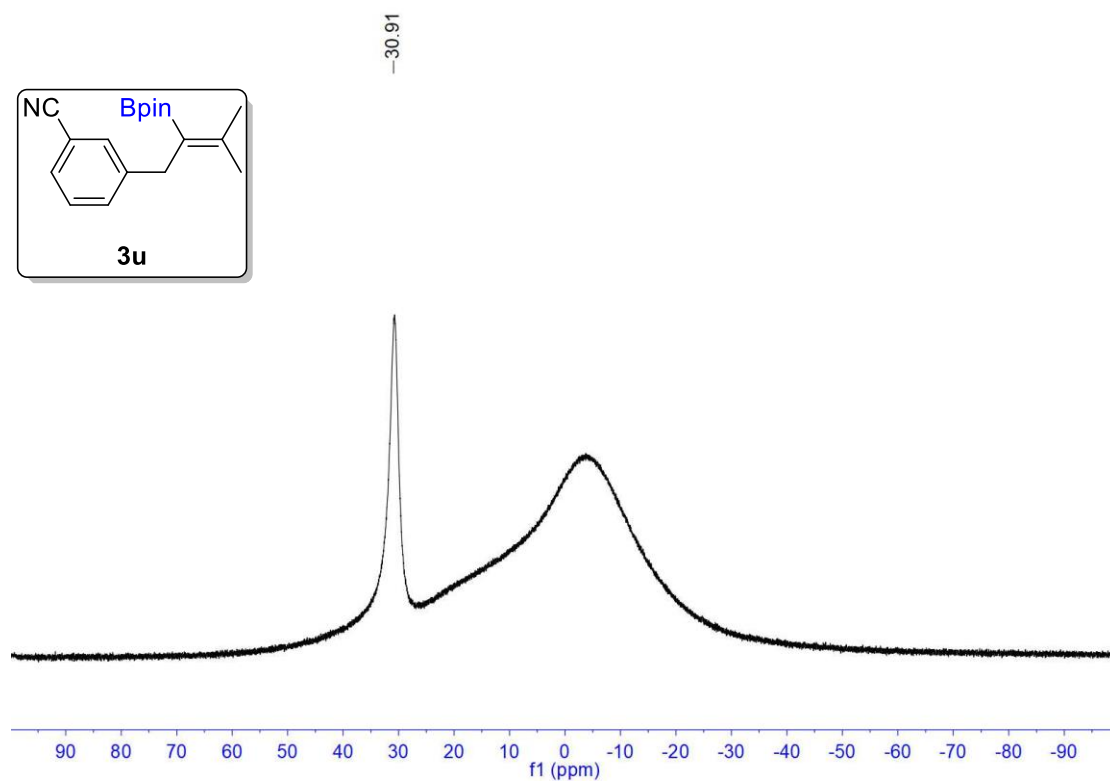

$^1\text{H}$  spectra ( $\text{CDCl}_3$ ) of 2-(1-(2-fluorophenyl)-3-methylbut-2-en-2-yl)-4,4,5,5-tetramethyl-1,3,2-dioxaborolane (**3v**)

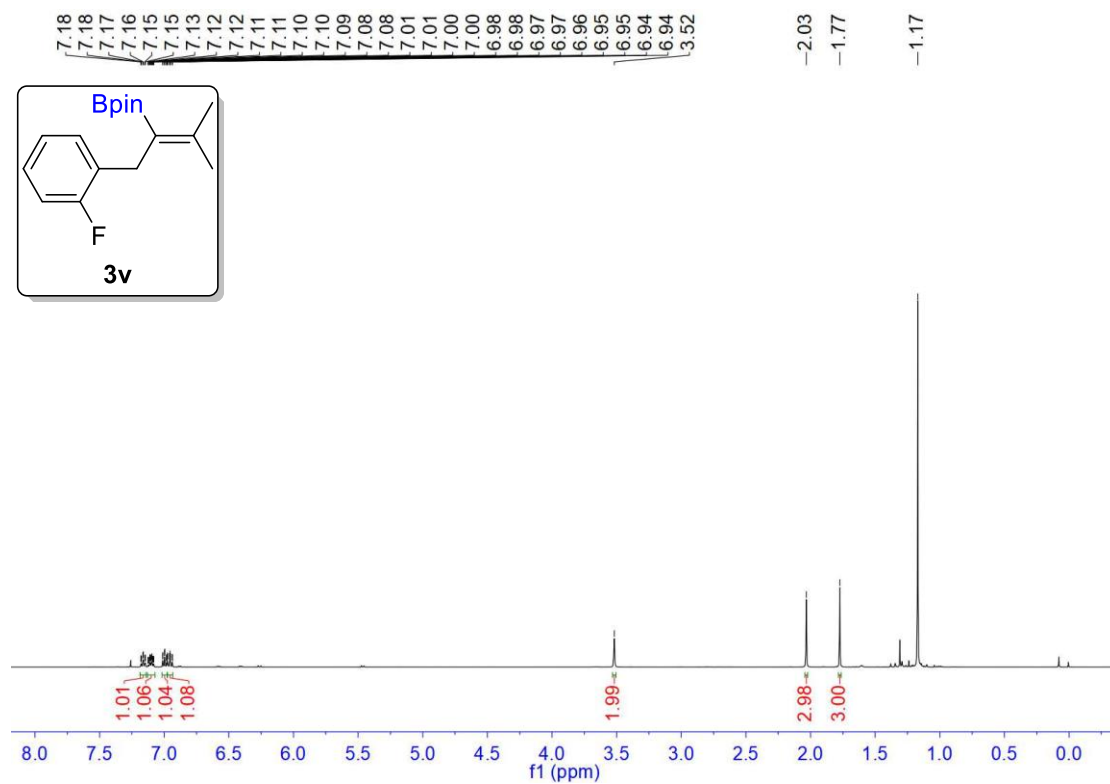



$^{13}\text{C}$  spectra ( $\text{CDCl}_3$ ) of 2-(1-(2-fluorophenyl)-3-methylbut-2-en-2-yl)-4,4,5,5-tetramethyl-1,3,2-dioxaborolane (**3v**)

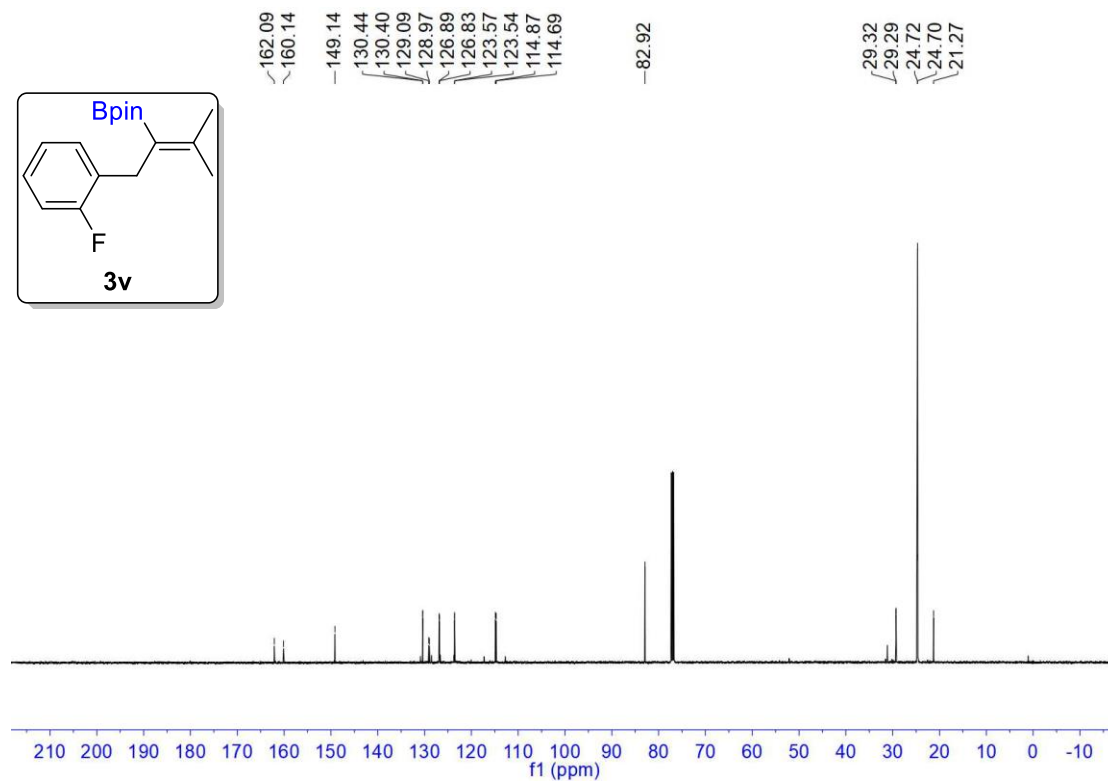

$^{19}\text{F}$  2-(1-(2-fluorophenyl)-3-methylbut-2-en-2-yl)-4,4,5,5-tetramethyl-1,3,2-dioxaborolane (**3v**)

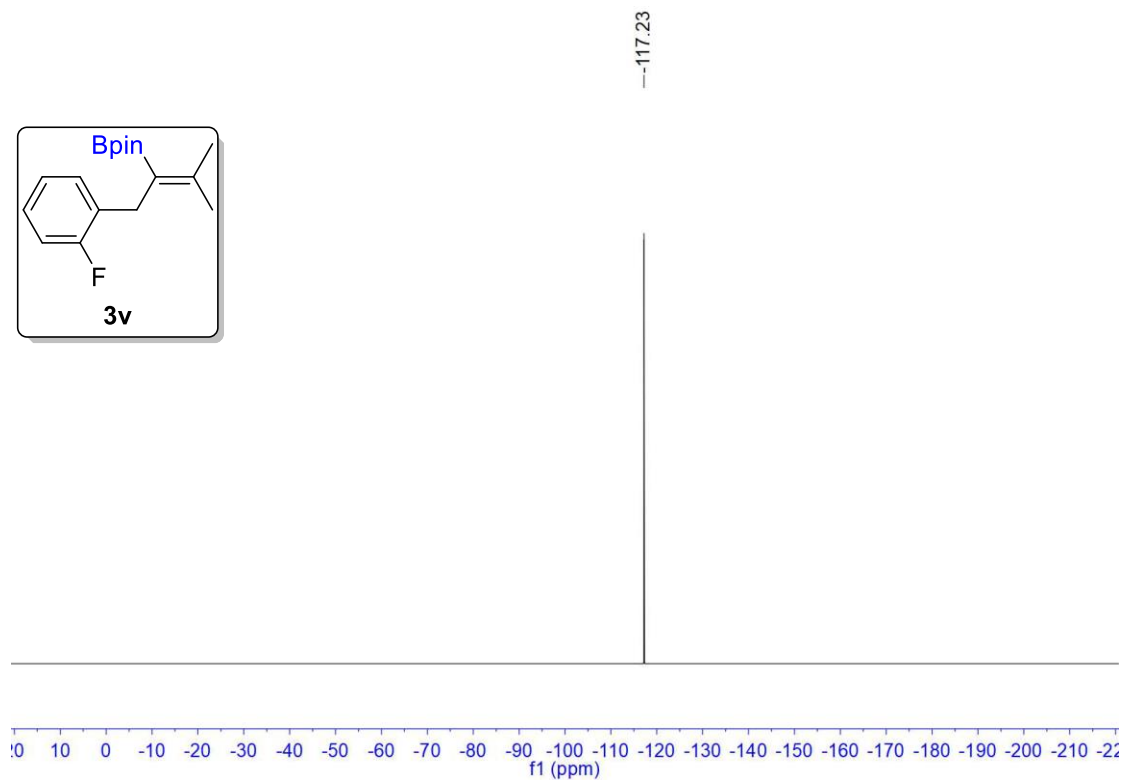

$^{11}\text{B}$  spectra ( $\text{CDCl}_3$ ) of 2-(1-(2-fluorophenyl)-3-methylbut-2-en-2-yl)-4,4,5,5-tetramethyl-1,3,2-dioxaborolane (**3v**)

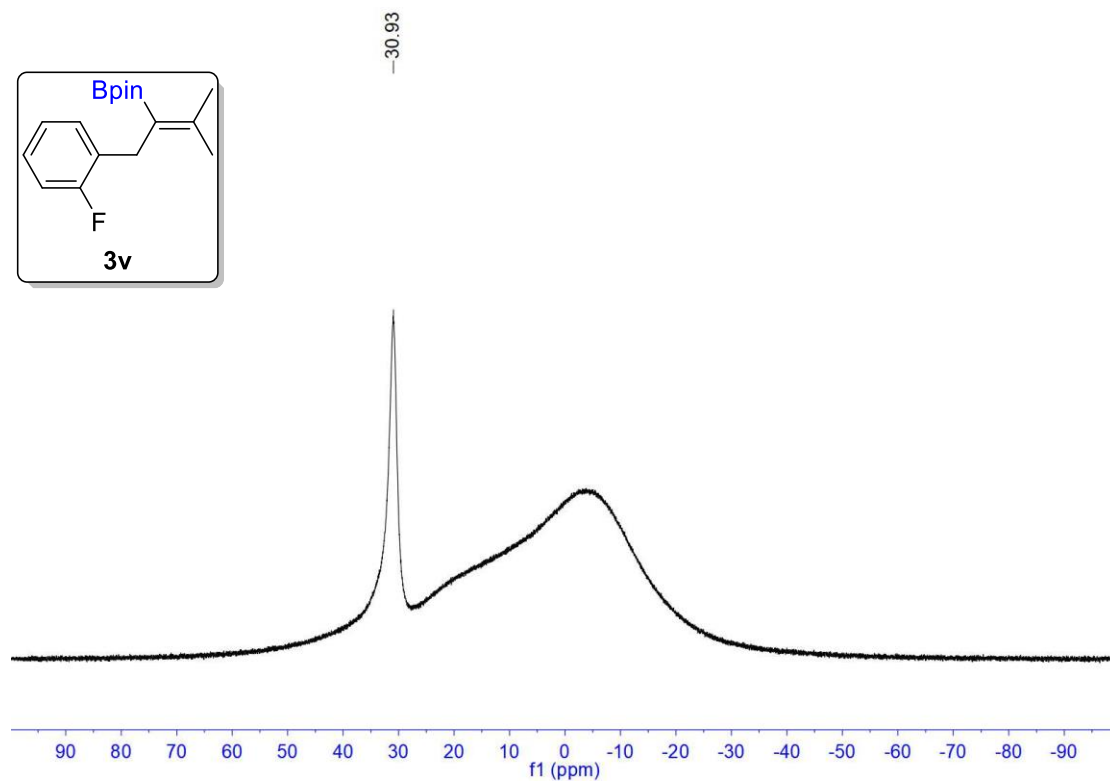

$^1\text{H}$  spectra ( $\text{CDCl}_3$ ) of 2-(1-(2-methoxyphenyl)-3-methylbut-2-en-2-yl)-4,4,5,5-tetramethyl-1,3,2-dioxaborolane (**3w**)

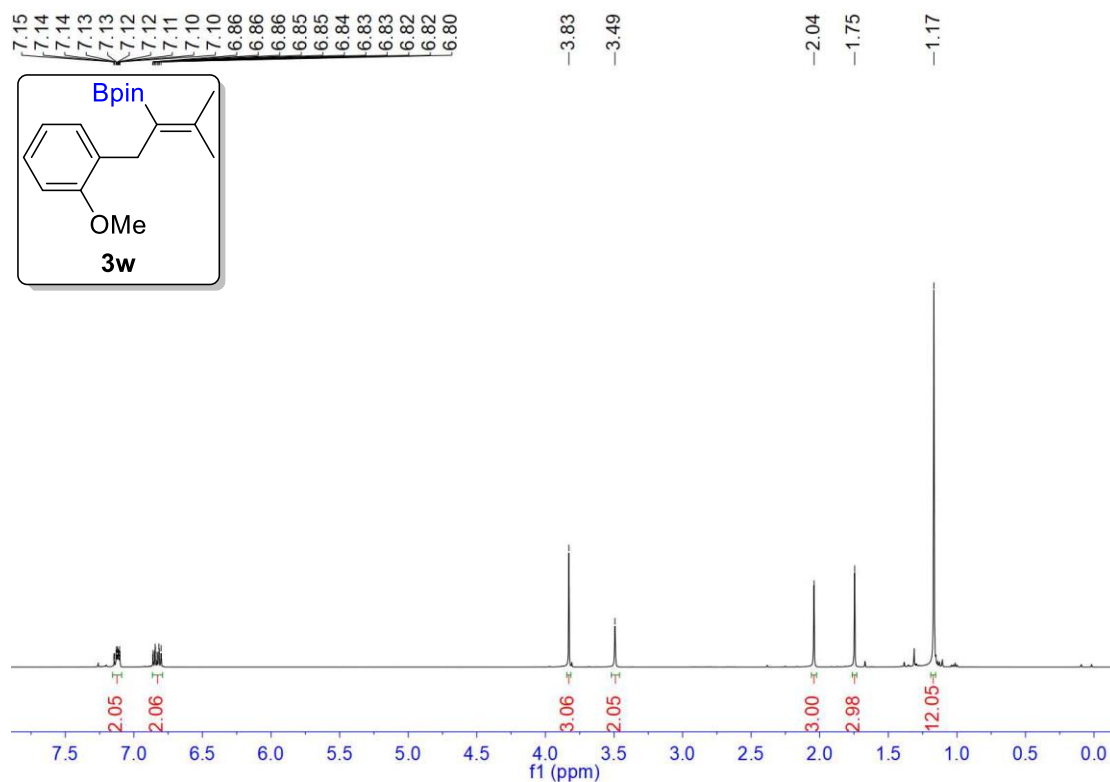

$^{13}\text{C}$  spectra ( $\text{CDCl}_3$ ) of 2-(1-(2-methoxyphenyl)-3-methylbut-2-en-2-yl)-4,4,5,5-tetramethyl-1,3,2-dioxaborolane (**3w**)

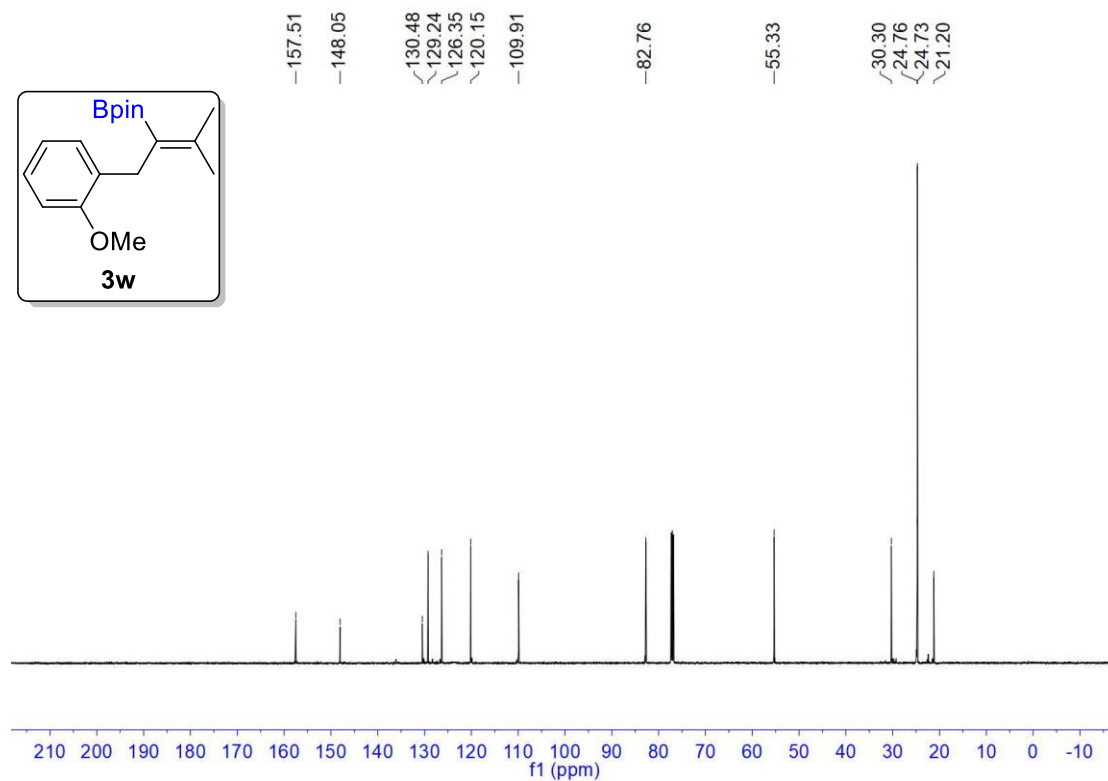

$^{11}\text{B}$  spectra ( $\text{CDCl}_3$ ) of 2-(1-(2-methoxyphenyl)-3-methylbut-2-en-2-yl)-4,4,5,5-tetramethyl-1,3,2-dioxaborolane (**3w**)

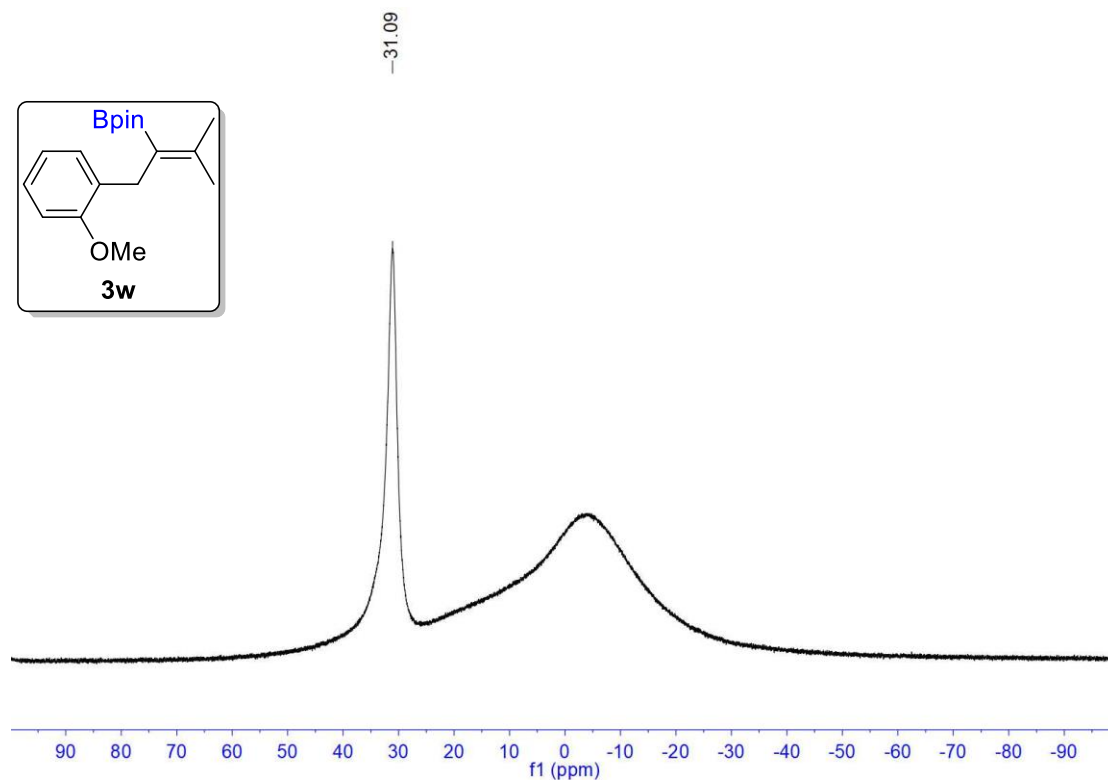

$^1\text{H}$  spectra ( $\text{CDCl}_3$ ) of 2-(1-(2-chlorophenyl)-3-methylbut-2-en-2-yl)-4,4,5,5-tetramethyl-1,3,2-dioxaborolane (**3x**)

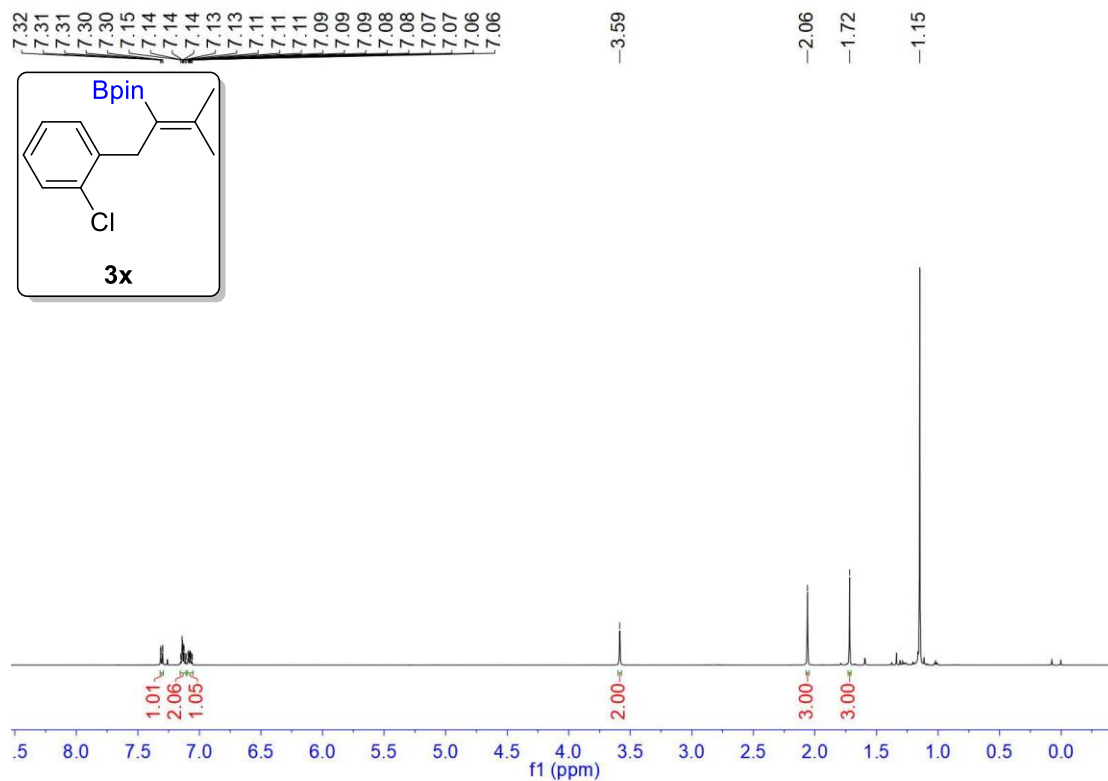

$^{13}\text{C}$  spectra ( $\text{CDCl}_3$ ) of 2-(1-(2-chlorophenyl)-3-methylbut-2-en-2-yl)-4,4,5,5-tetramethyl-1,3,2-dioxaborolane (**3x**)

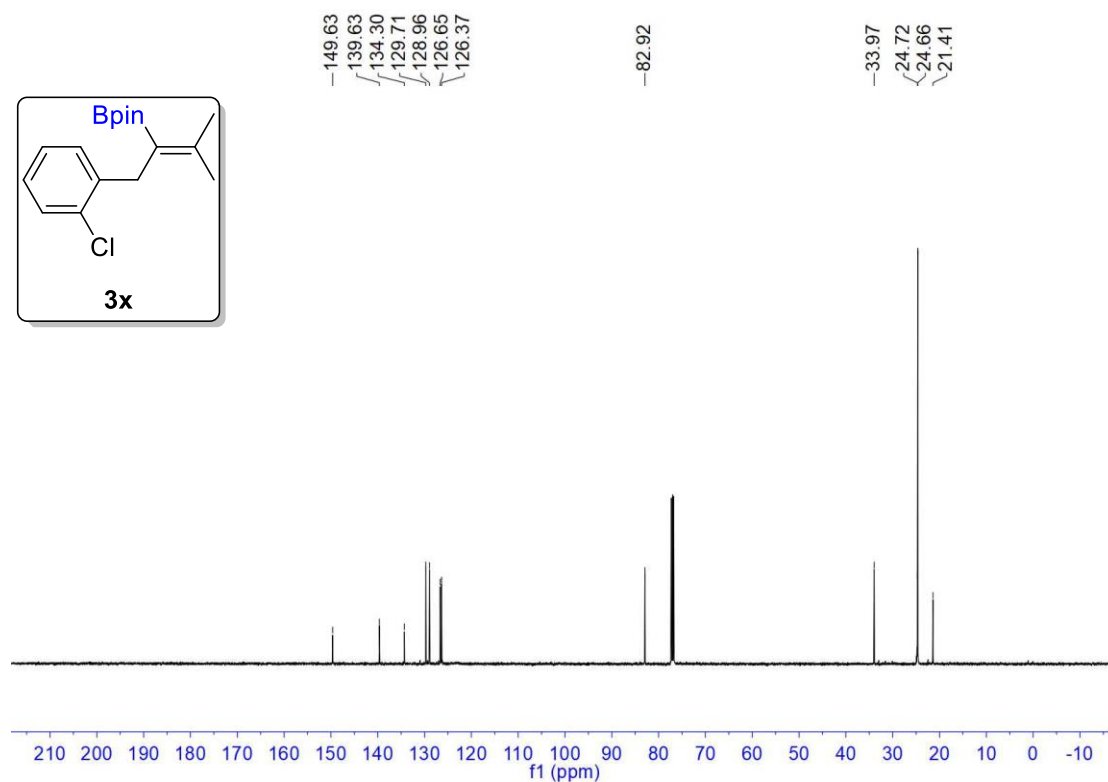

$^{11}\text{B}$  spectra ( $\text{CDCl}_3$ ) of 2-(1-(2-chlorophenyl)-3-methylbut-2-en-2-yl)-4,4,5,5-tetramethyl-1,3,2-dioxaborolane (**3x**)

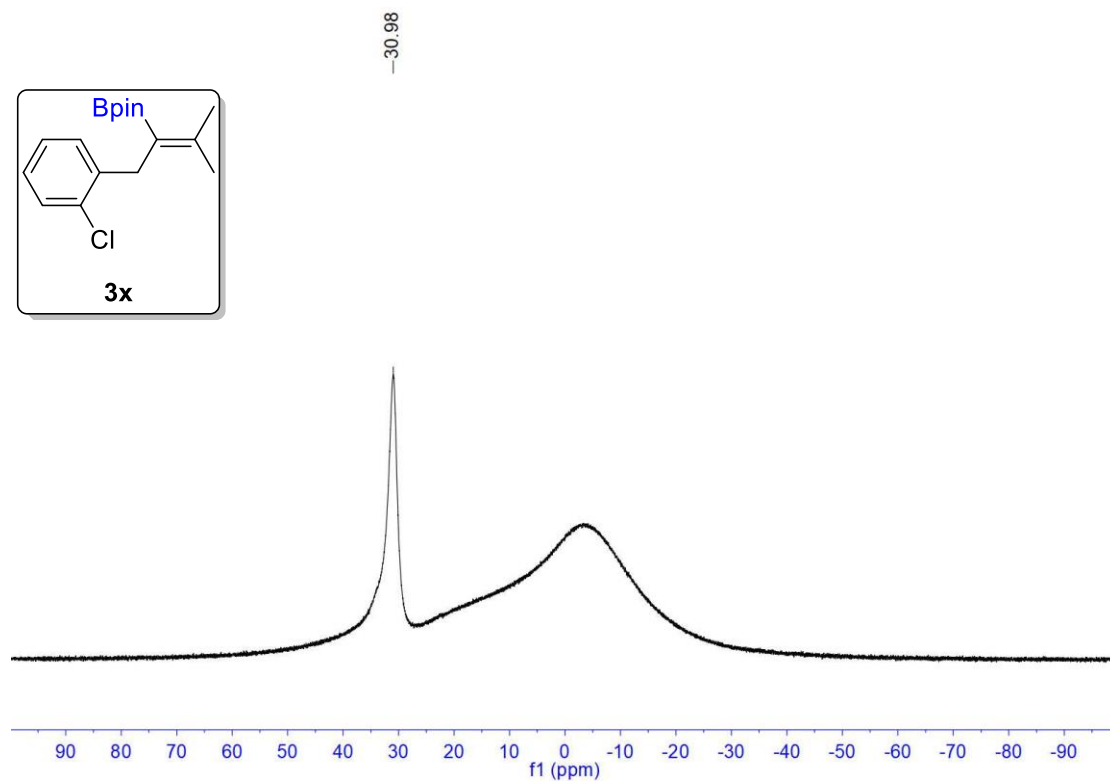

$^1\text{H}$  spectra ( $\text{CDCl}_3$ ) of methyl 2-(3-methyl-2-(4,4,5,5-tetramethyl-1,3,2-dioxaborolan-2-yl)but-2-en-1-yl)benzoate (**3y**)

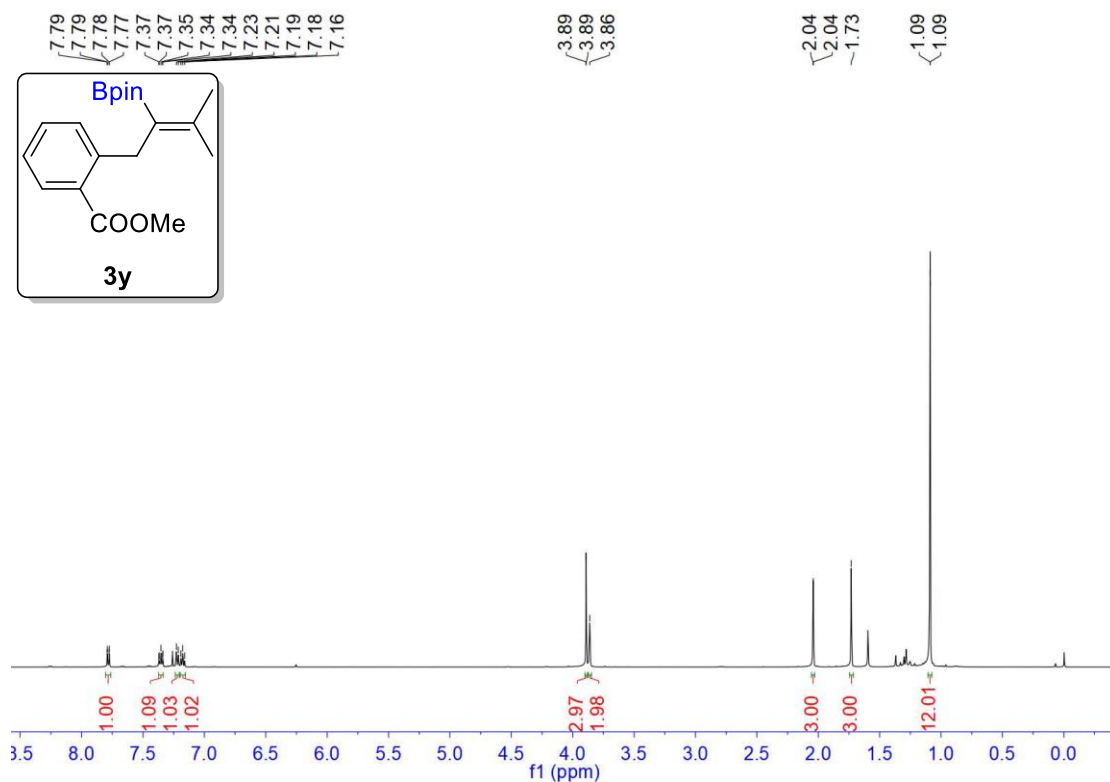

$^{13}\text{C}$  spectra ( $\text{CDCl}_3$ ) of methyl 2-(3-methyl-2-(4,4,5,5-tetramethyl-1,3,2-dioxaborolan-2-yl)but-2-en-1-yl)benzoate (**3y**)

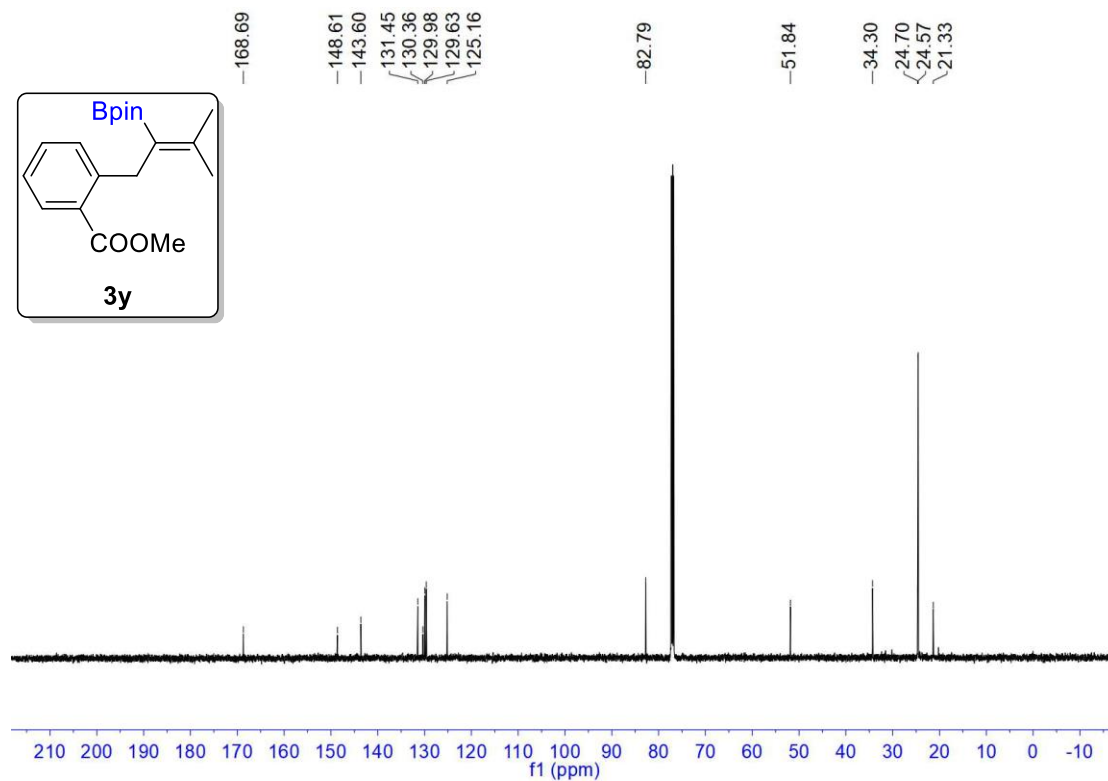

$^{11}\text{B}$  spectra ( $\text{CDCl}_3$ ) of methyl 2-(3-methyl-2-(4,4,5,5-tetramethyl-1,3,2-dioxaborolan-2-yl)but-2-en-1-yl)benzoate (**3y**)

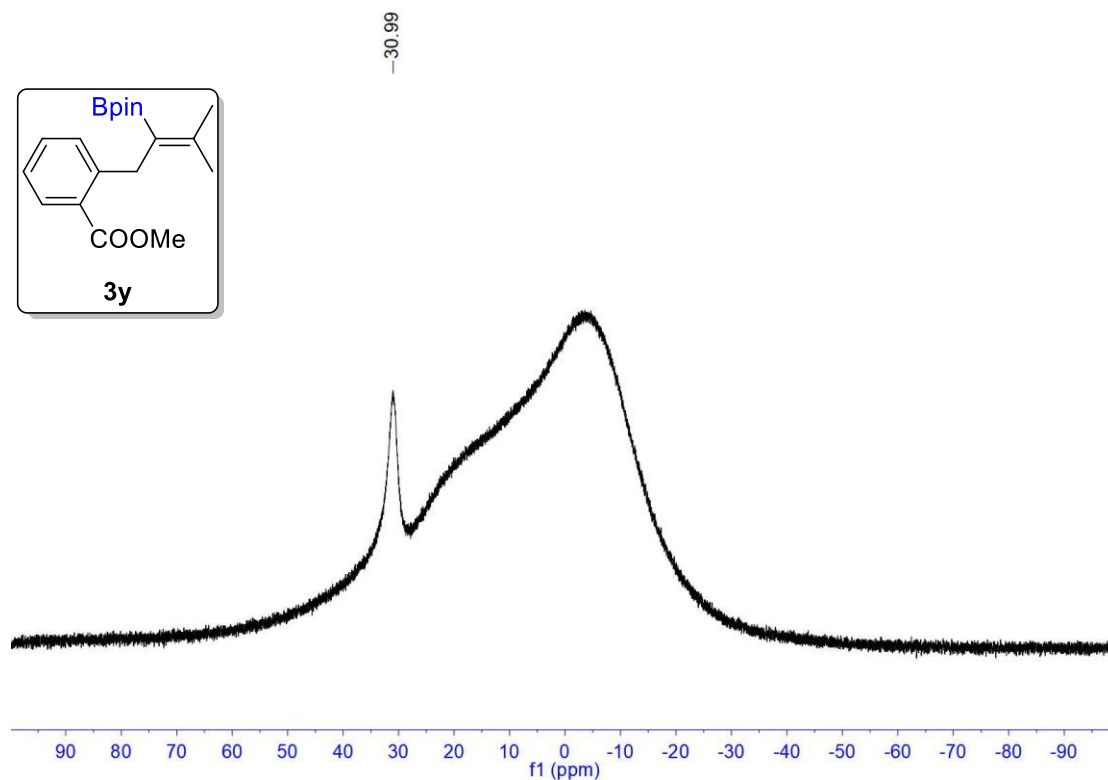

$^1\text{H}$  spectra ( $\text{CDCl}_3$ ) of 2-(1-(3,4-dichlorophenyl)-3-methylbut-2-en-2-yl)-4,4,5,5-tetramethyl-1,3,2-dioxaborolane (**3z**)

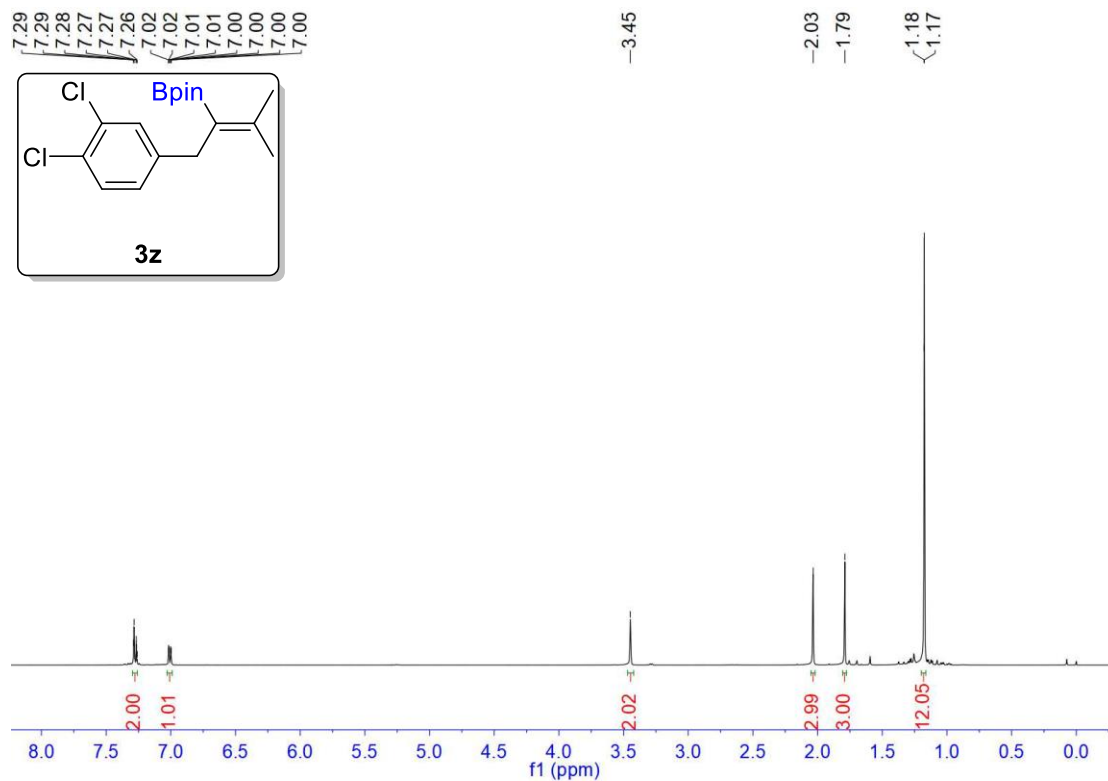

$^{13}\text{C}$  spectra ( $\text{CDCl}_3$ ) of 2-(1-(3,4-dichlorophenyl)-3-methylbut-2-en-2-yl)-4,4,5,5-tetramethyl-1,3,2-dioxaborolane (**3z**)

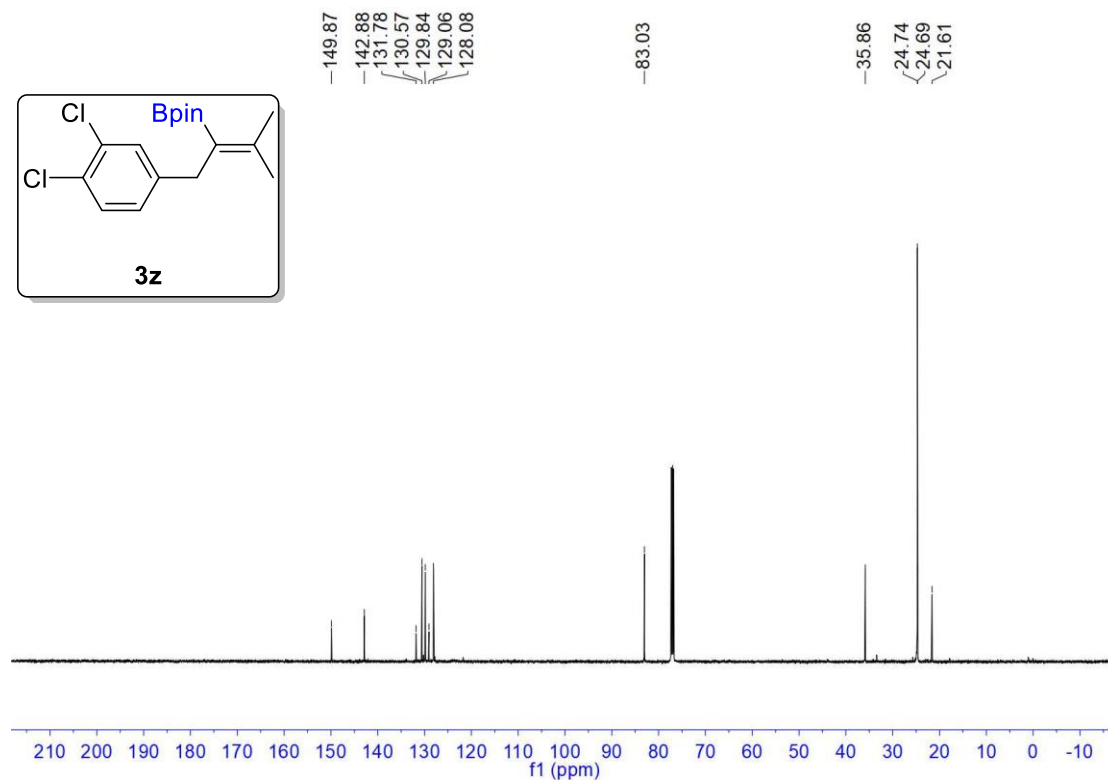

$^{11}\text{B}$  spectra ( $\text{CDCl}_3$ ) of 2-(1-(3,4-dichlorophenyl)-3-methylbut-2-en-2-yl)-4,4,5,5-tetramethyl-1,3,2-dioxaborolane (**3z**)

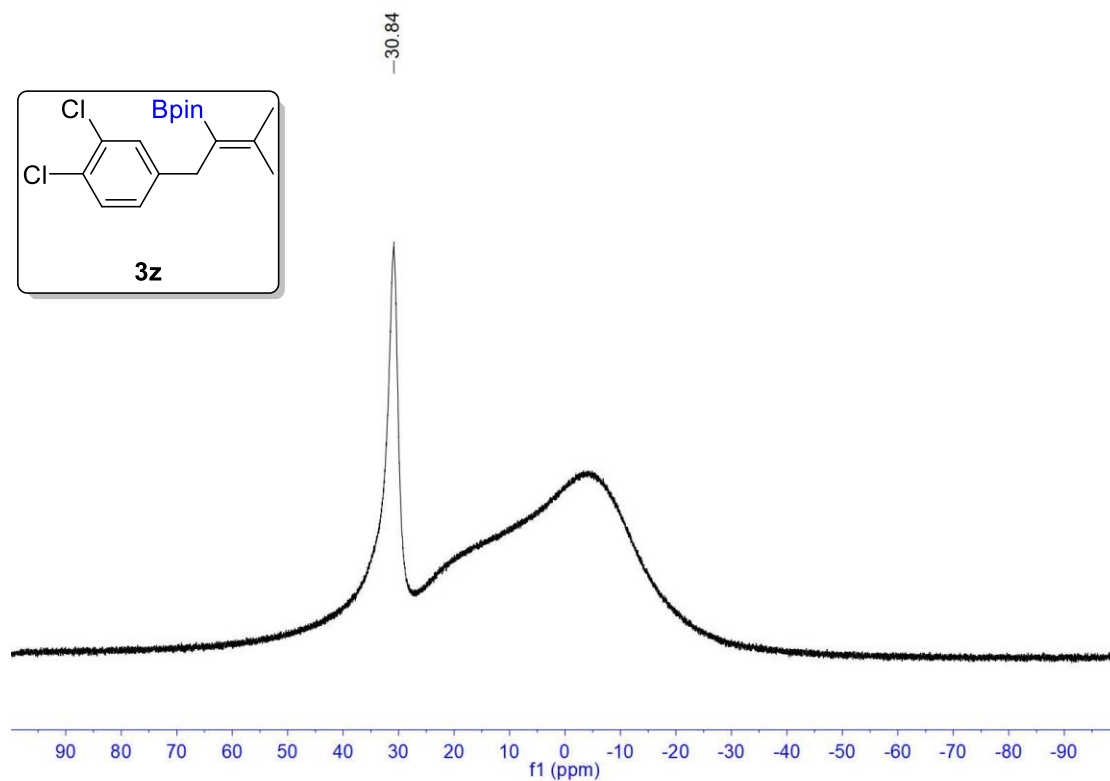

$^1\text{H}$  spectra ( $\text{CDCl}_3$ ) of 2-(1-(5-chloro-2-methoxyphenyl)-3-methylbut-2-en-2-yl)-4,4,5,5-tetramethyl-1,3,2-dioxaborolane (**3aa**)

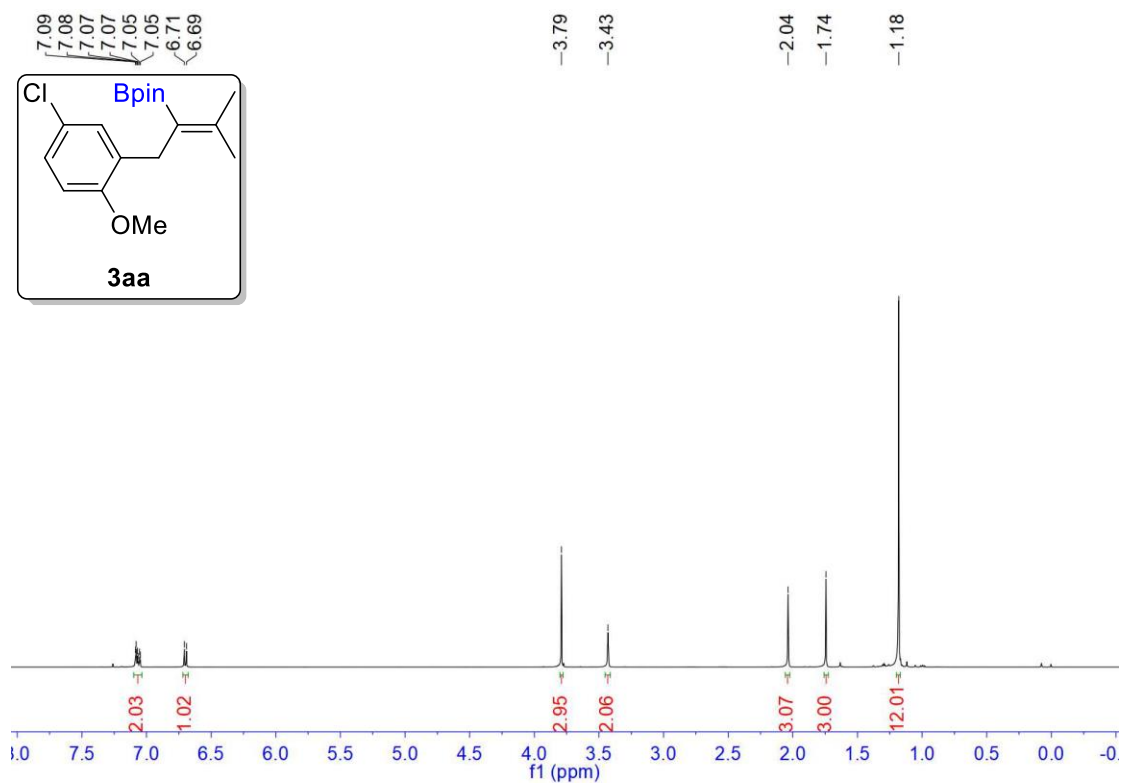



$^{13}\text{C}$  spectra ( $\text{CDCl}_3$ ) of 2-(1-(5-chloro-2-methoxyphenyl)-3-methylbut-2-en-2-yl)-4,4,5,5-tetramethyl-1,3,2-dioxaborolane (**3aa**)

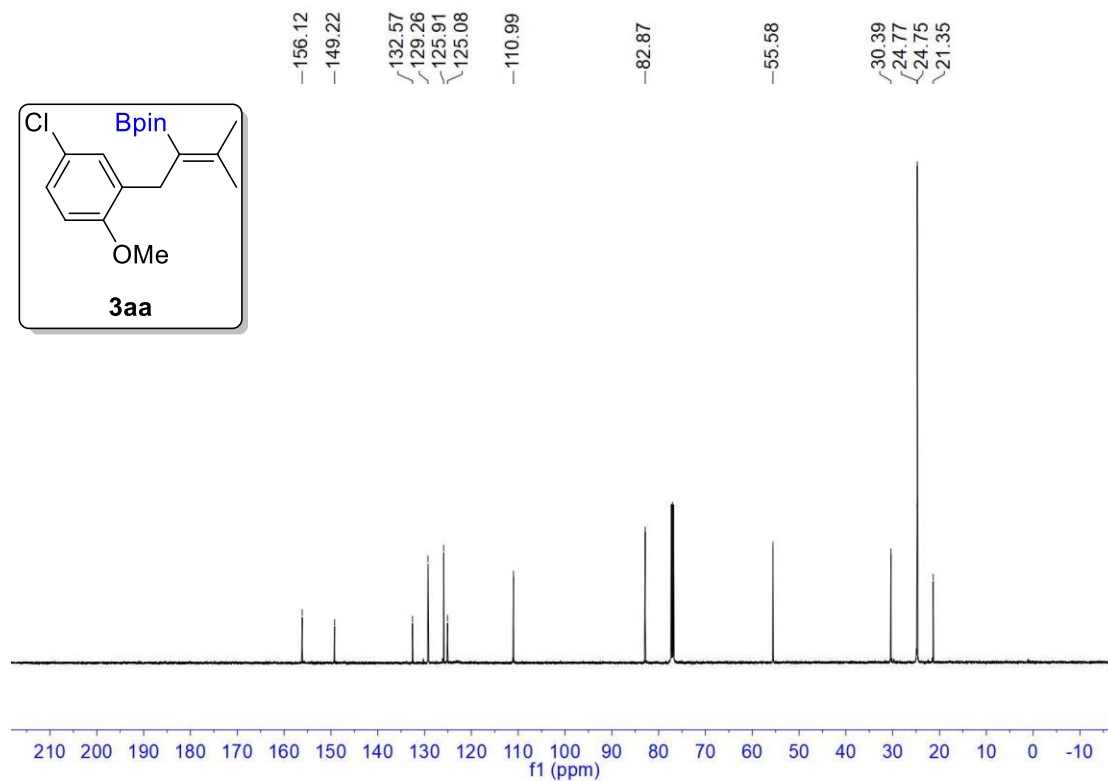

$^{11}\text{B}$  spectra ( $\text{CDCl}_3$ ) of 2-(1-(5-chloro-2-methoxyphenyl)-3-methylbut-2-en-2-yl)-4,4,5,5-tetramethyl-1,3,2-dioxaborolane (**3aa**)

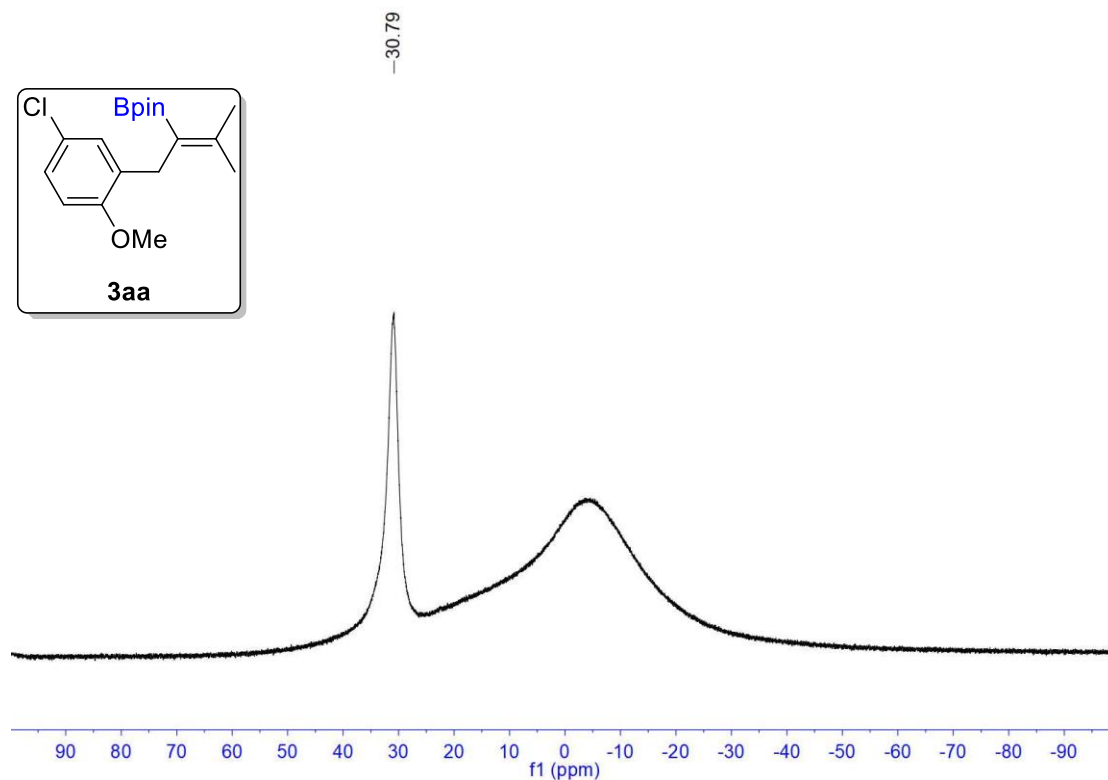

$^1\text{H}$  spectra ( $\text{CDCl}_3$ ) of 4,4,5,5-tetramethyl-2-(3-methyl-1-(thiophen-2-yl)but-2-en-2-yl)-1,3,2-dioxaborolane (**3ab**)

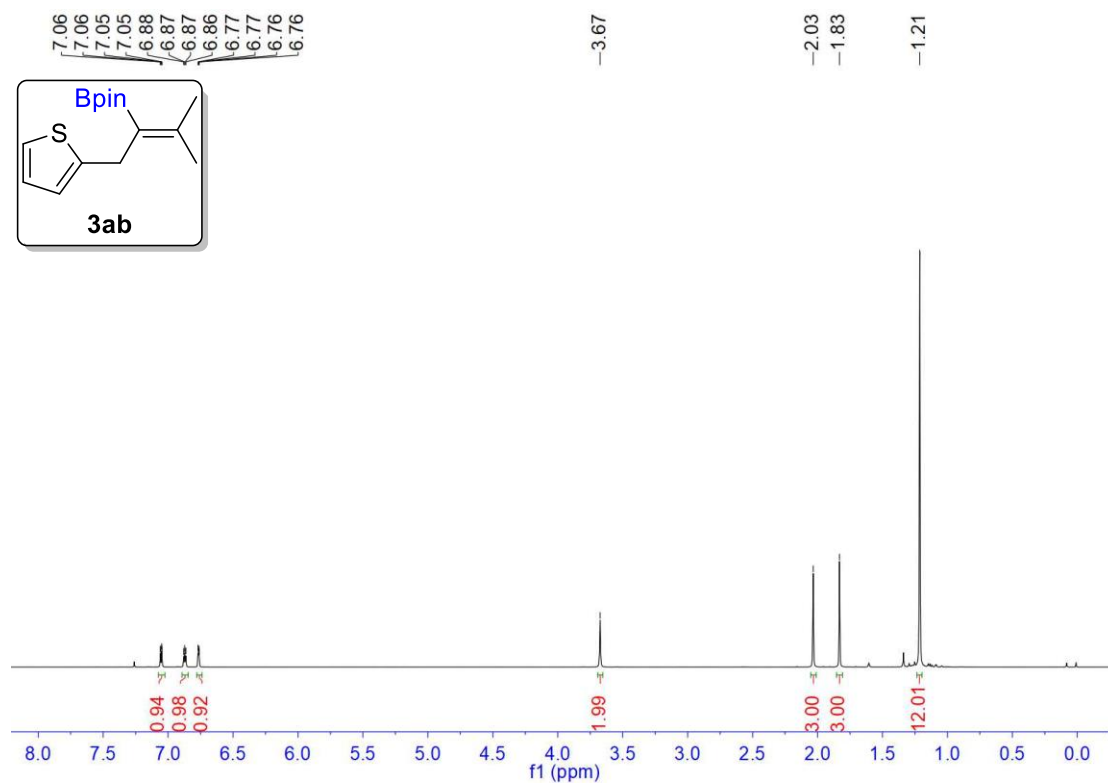

$^{13}\text{C}$  spectra ( $\text{CDCl}_3$ ) of 4,4,5,5-tetramethyl-2-(3-methyl-1-(thiophen-2-yl)but-2-en-2-yl)-1,3,2-dioxaborolane (**3ab**)

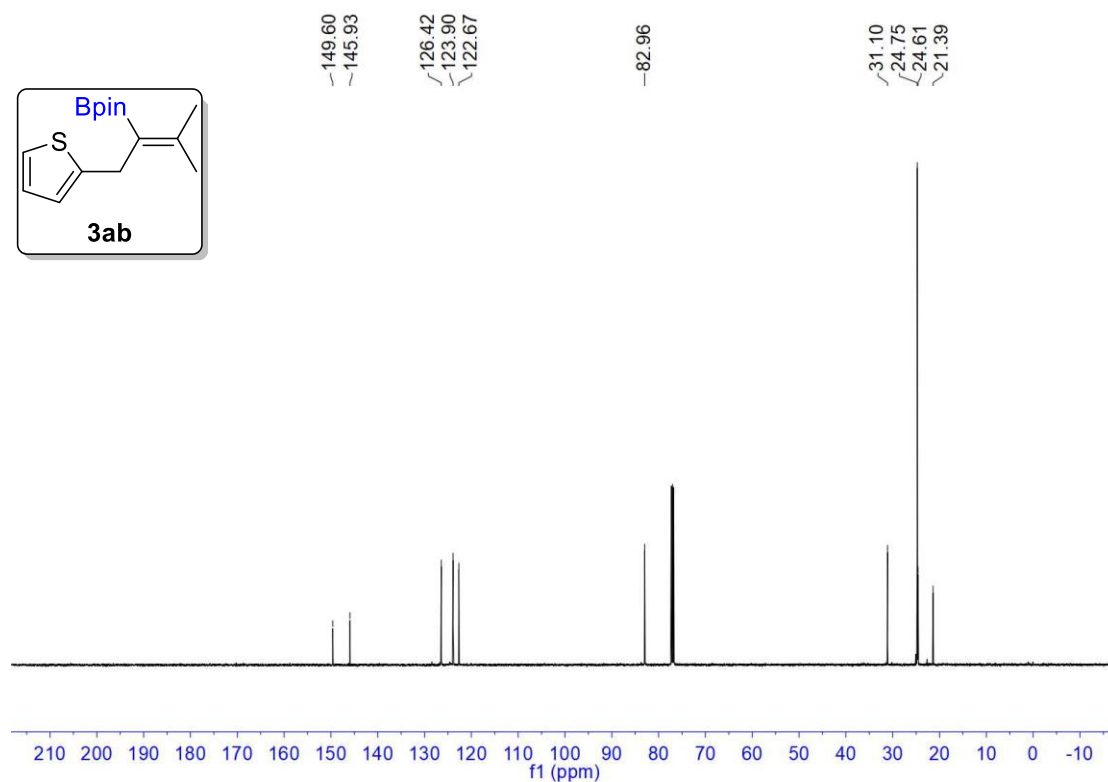

$^{11}\text{B}$  spectra ( $\text{CDCl}_3$ ) of 4,4,5,5-tetramethyl-2-(3-methyl-1-(thiophen-2-yl)but-2-en-2-yl)-1,3,2-dioxaborolane (**3ab**)

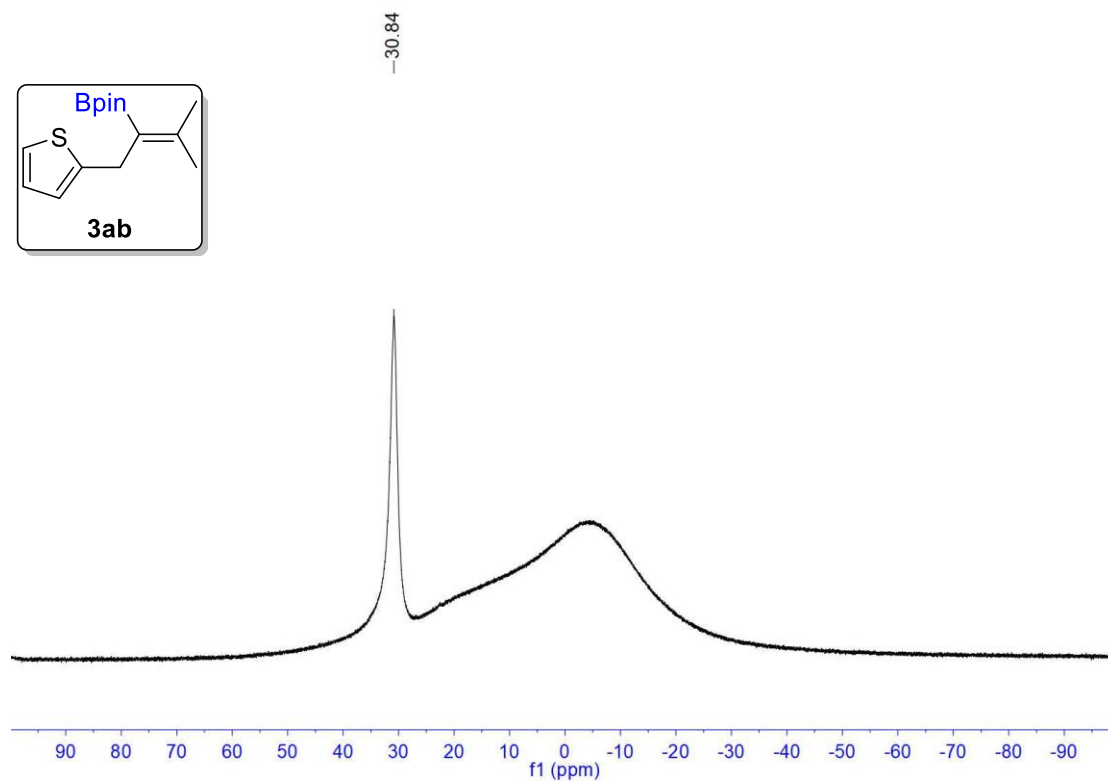

$^1\text{H}$  spectra ( $\text{CDCl}_3$ ) of 4,4,5,5-tetramethyl-2-(3-methyl-1-(naphthalen-1-yl)but-2-en-2-yl)-1,3,2-dioxaborolane (**3ac**)

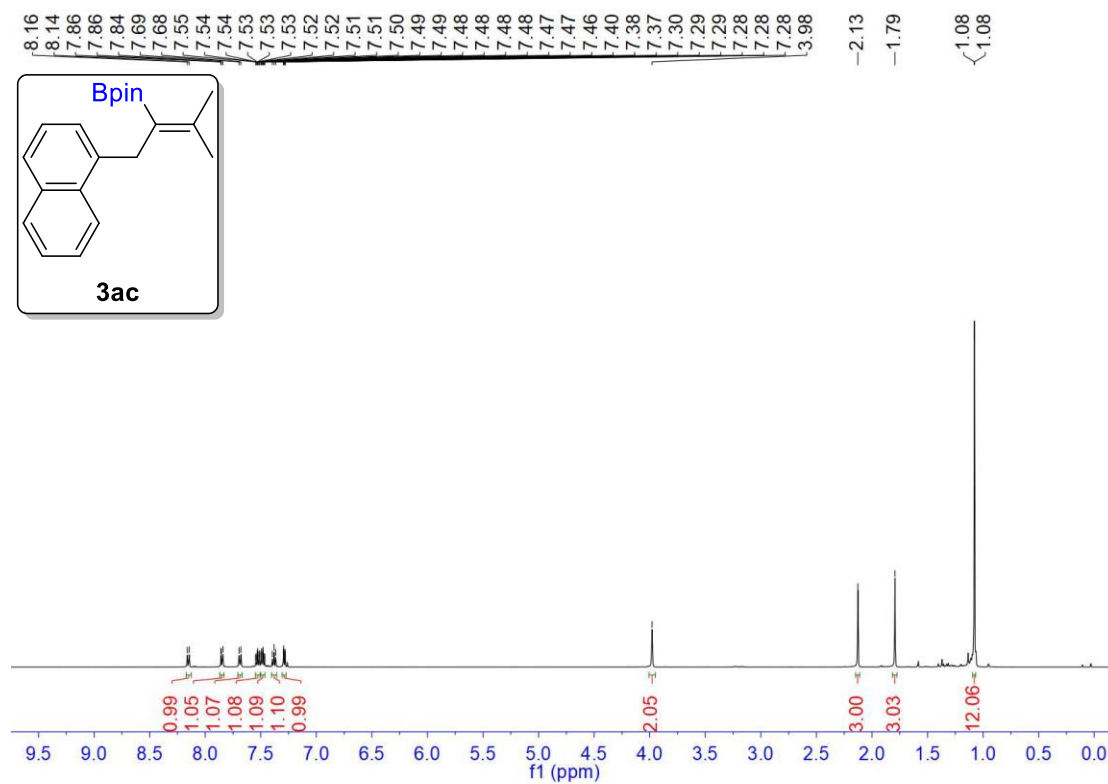

$^{13}\text{C}$  spectra ( $\text{CDCl}_3$ ) of 4,4,5,5-tetramethyl-2-(3-methyl-1-(naphthalen-1-yl)but-2-en-2-yl)-1,3,2-dioxaborolane (**3ac**)

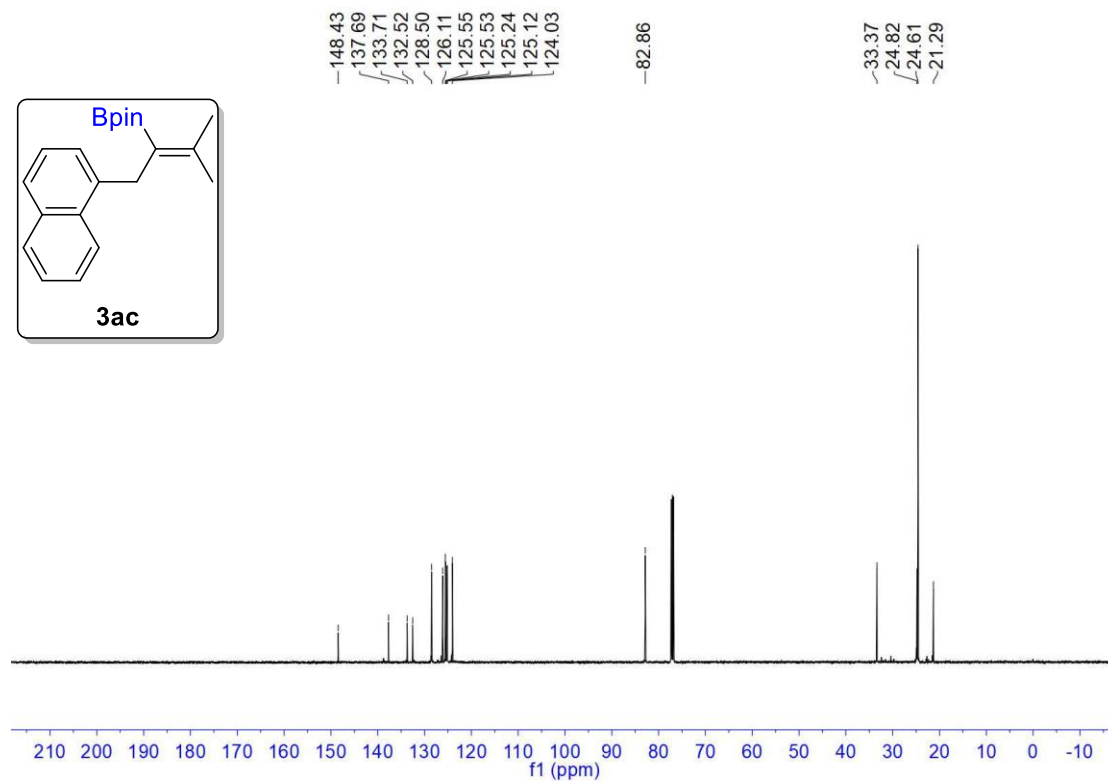

$^{11}\text{B}$  spectra ( $\text{CDCl}_3$ ) of 4,4,5,5-tetramethyl-2-(3-methyl-1-(naphthalen-1-yl)but-2-en-2-yl)-1,3,2-dioxaborolane (**3ac**)

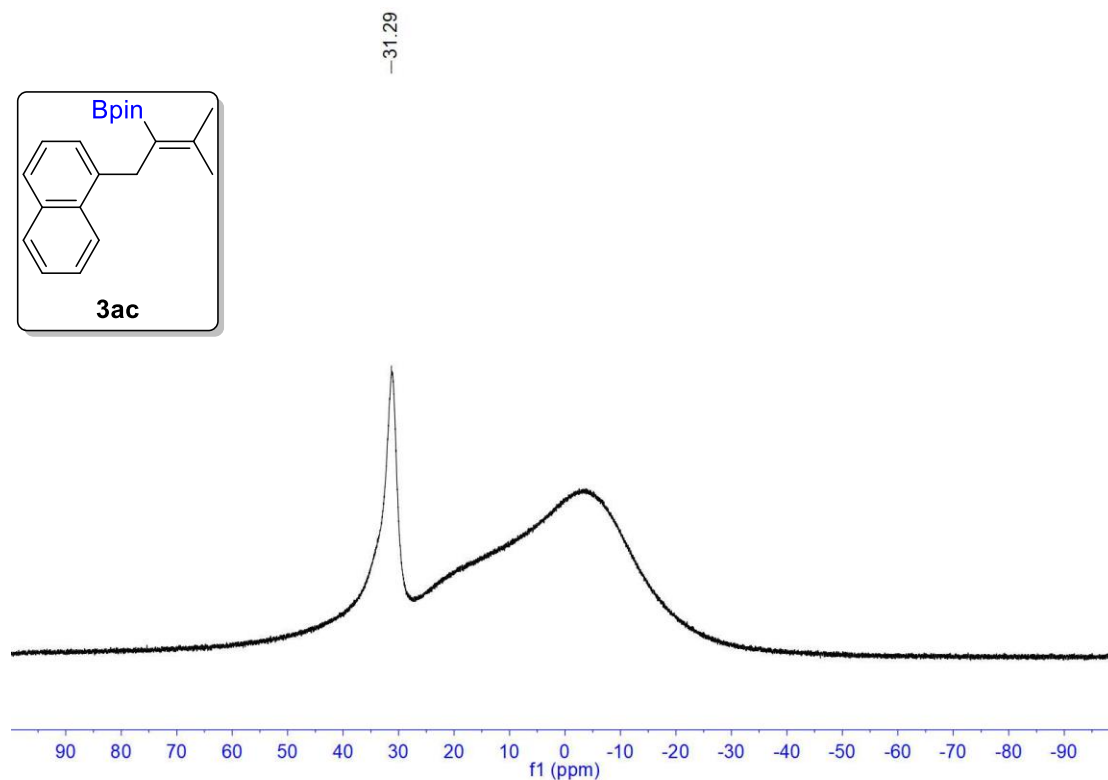

$^1\text{H}$  spectra ( $\text{CDCl}_3$ ) of 2-(1-(9H-fluoren-2-yl)-3-methylbut-2-en-2-yl)-4,4,5,5-tetramethyl-1,3,2-dioxaborolane (**3ad**)

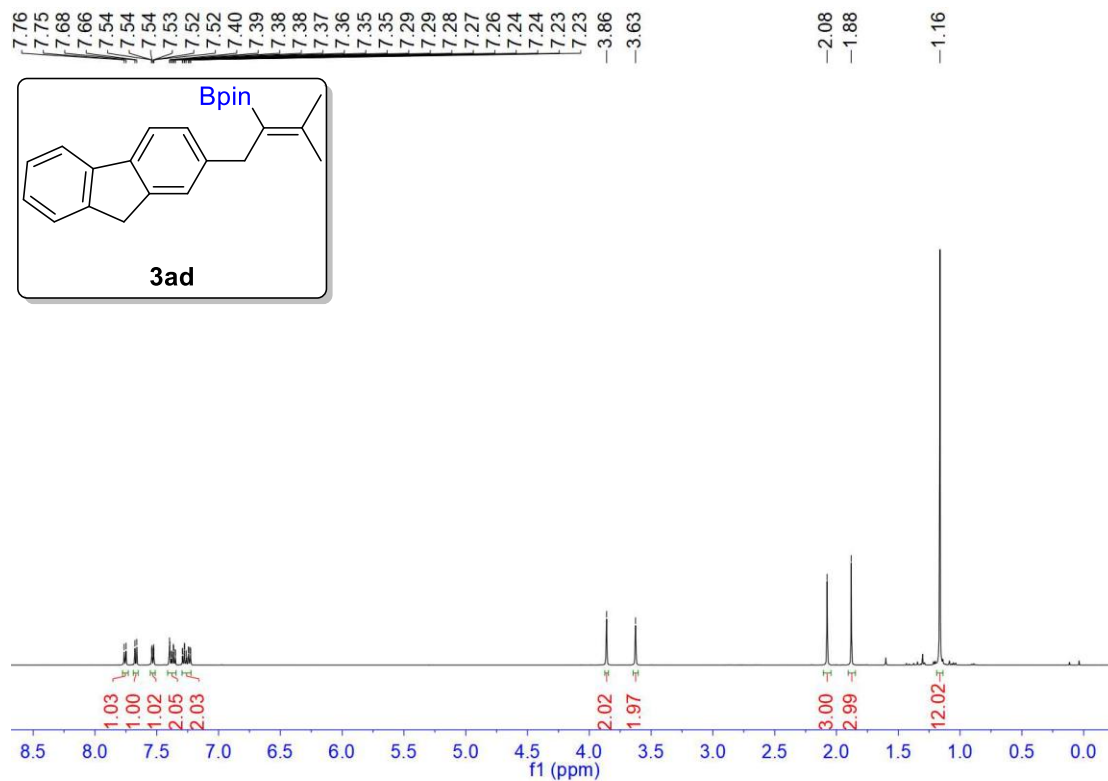

$^{13}\text{C}$  spectra ( $\text{CDCl}_3$ ) of 2-(1-(9H-fluoren-2-yl)-3-methylbut-2-en-2-yl)-4,4,5,5-tetramethyl-1,3,2-dioxaborolane (**3ad**)

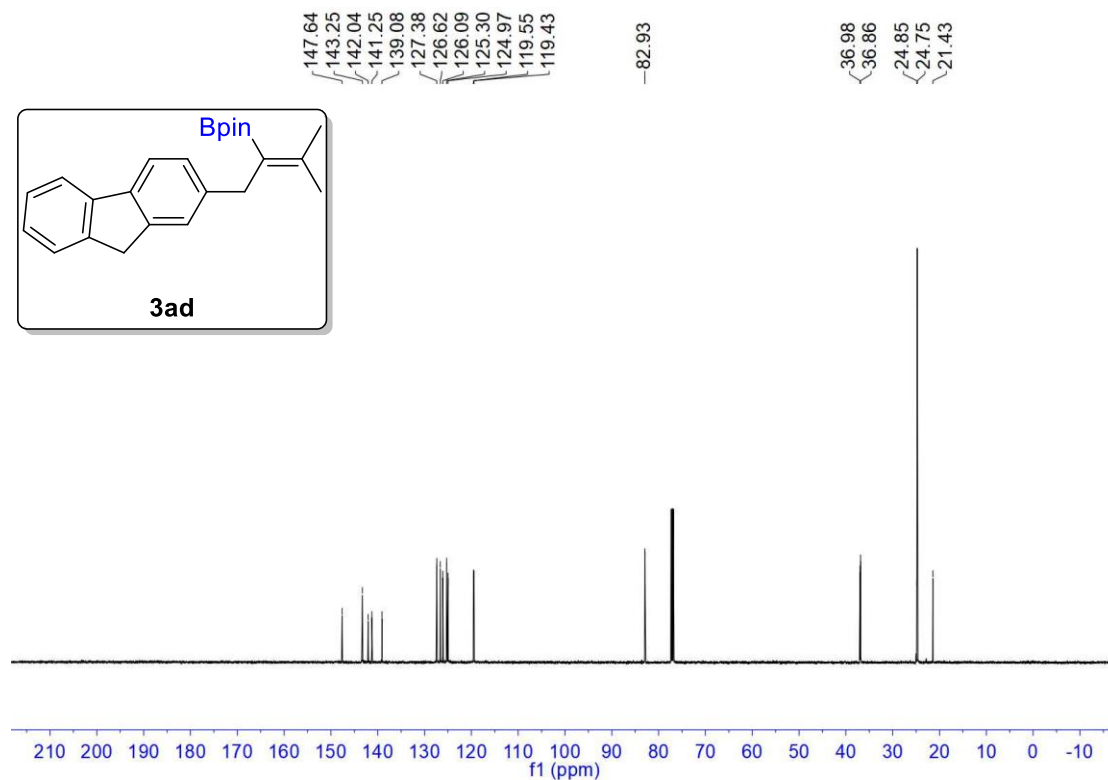

$^{11}\text{B}$  spectra ( $\text{CDCl}_3$ ) of 2-(1-(9H-fluoren-2-yl)-3-methylbut-2-en-2-yl)-4,4,5,5-tetramethyl-1,3,2-dioxaborolane (**3ad**)

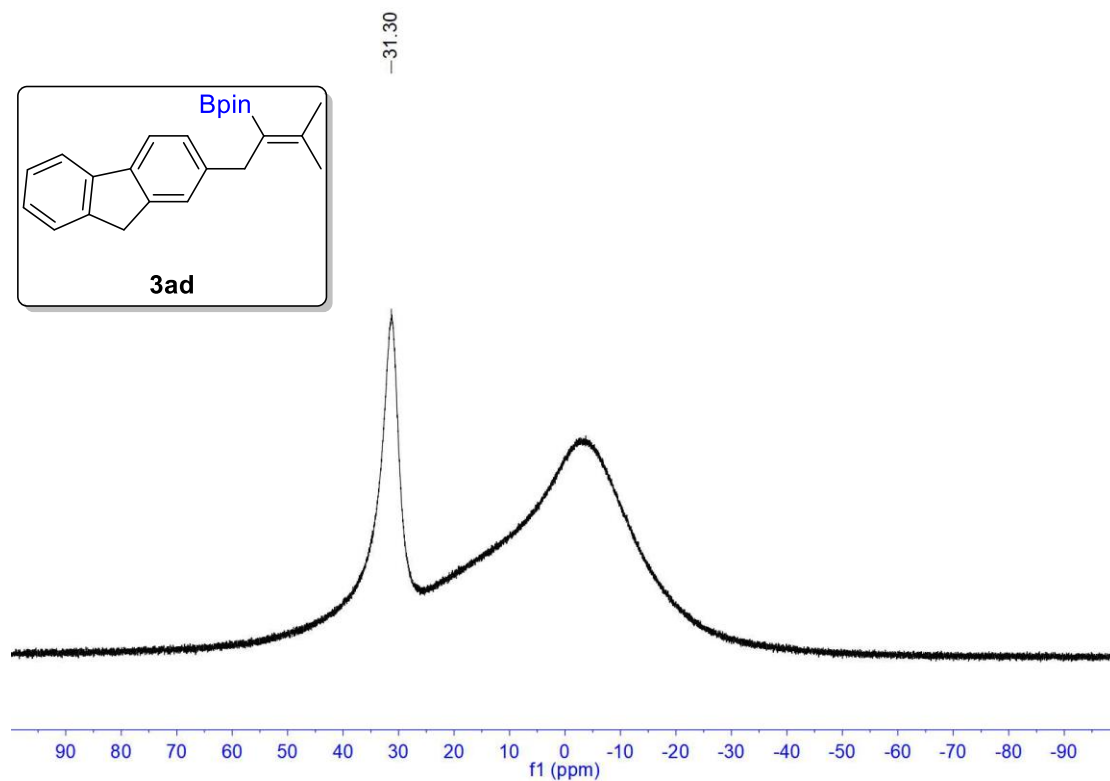

$^1\text{H}$  spectra ( $\text{CDCl}_3$ ) of 2-(1-(2,3-dihydrobenzo[b][1,4]dioxin-6-yl)-3-methylbut-2-en-2-yl)-4,4,5,5-tetramethyl-1,3,2-dioxaborolane (**3ae**)

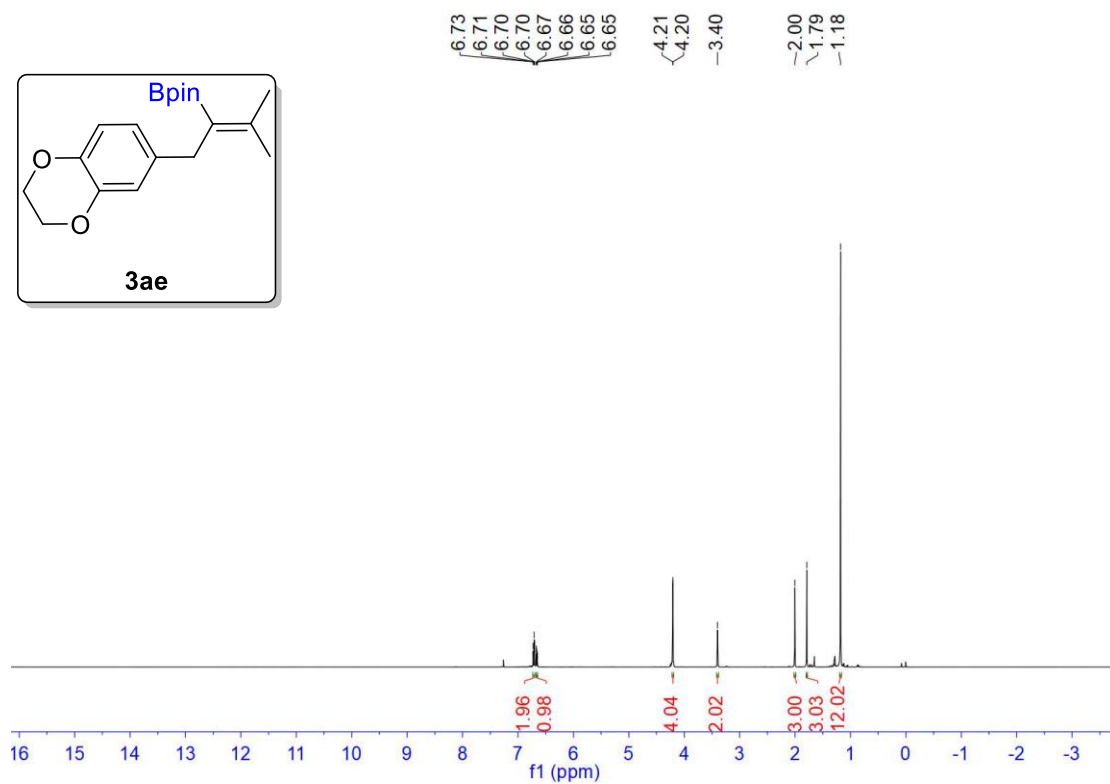

$^{13}\text{C}$  spectra ( $\text{CDCl}_3$ ) of 2-(1-(2,3-dihydrobenzo[b][1,4]dioxin-6-yl)-3-methylbut-2-en-2-yl)-4,4,5,5-tetramethyl-1,3,2-dioxaborolane (**3ae**)

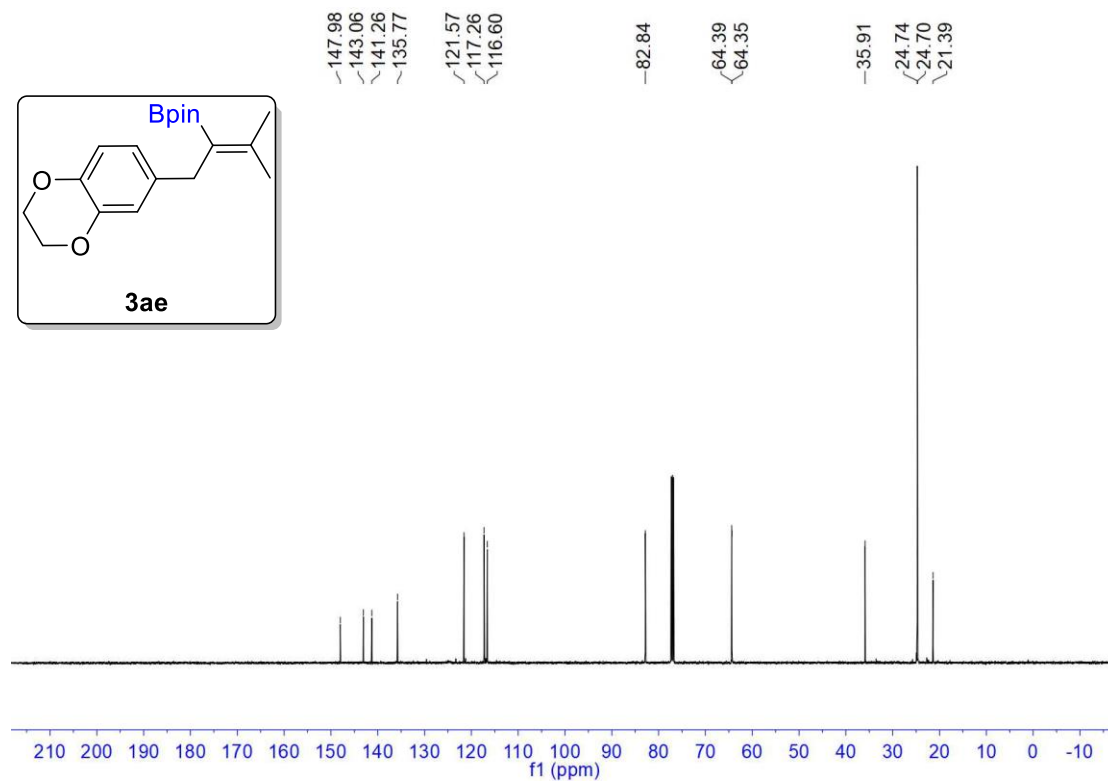

$^{11}\text{B}$  spectra ( $\text{CDCl}_3$ ) of 2-(1-(2,3-dihydrobenzo[b][1,4]dioxin-6-yl)-3-methylbut-2-en-2-yl)-4,4,5,5-tetramethyl-1,3,2-dioxaborolane (**3ae**)

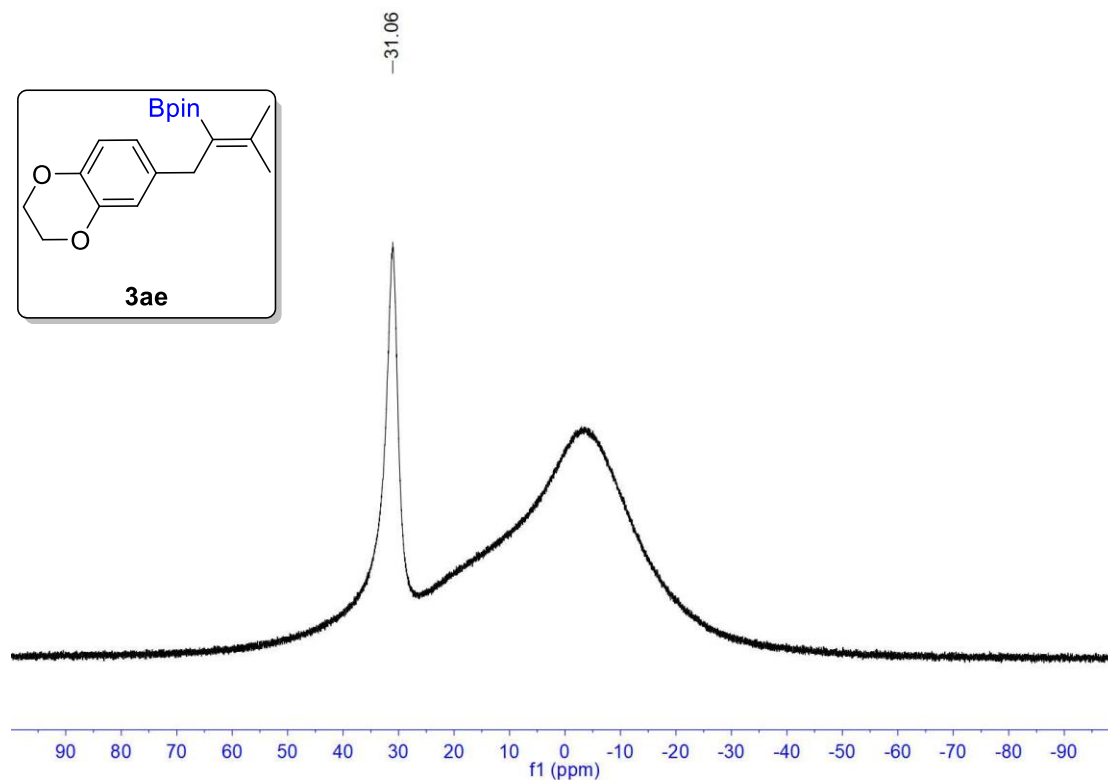

<sup>1</sup>H spectra (CDCl<sub>3</sub>) of 2-(3-ethyl-1-phenylpent-2-en-2-yl)-4,4,5,5-tetramethyl-1,3,2-dioxaborolane (**3af**)

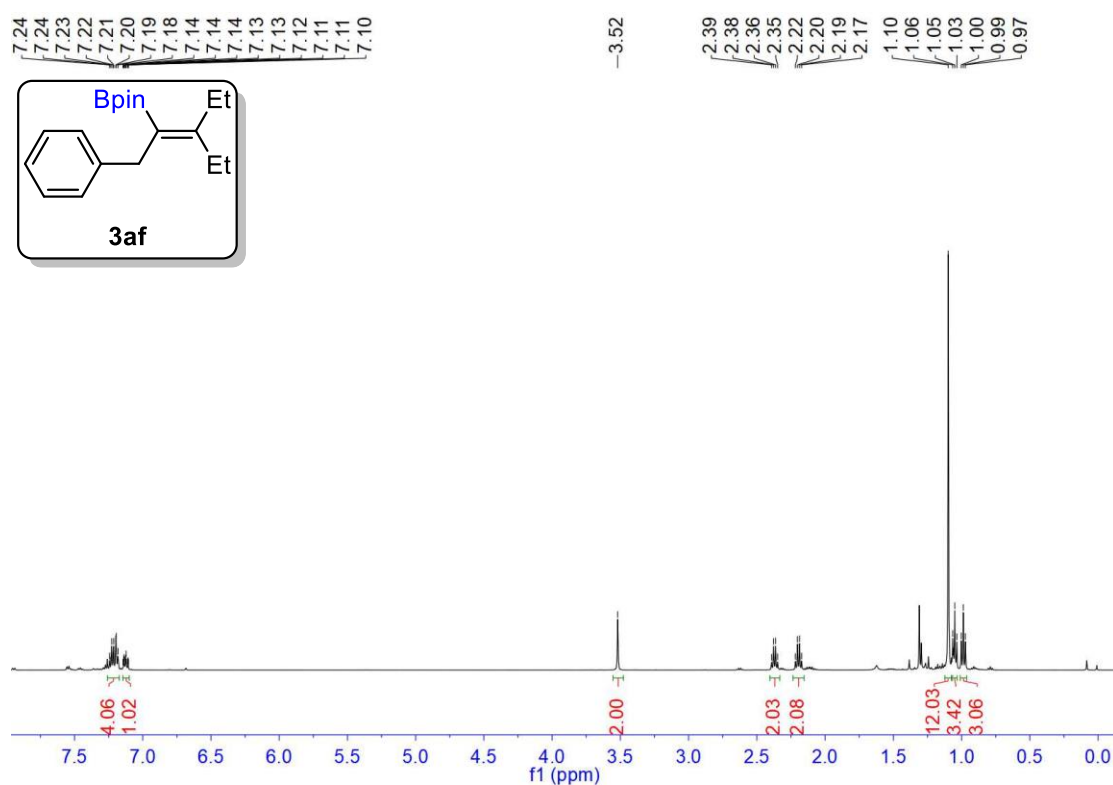

<sup>13</sup>C spectra (CDCl<sub>3</sub>) of 2-(3-ethyl-1-phenylpent-2-en-2-yl)-4,4,5,5-tetramethyl-1,3,2-dioxaborolane (**3af**)

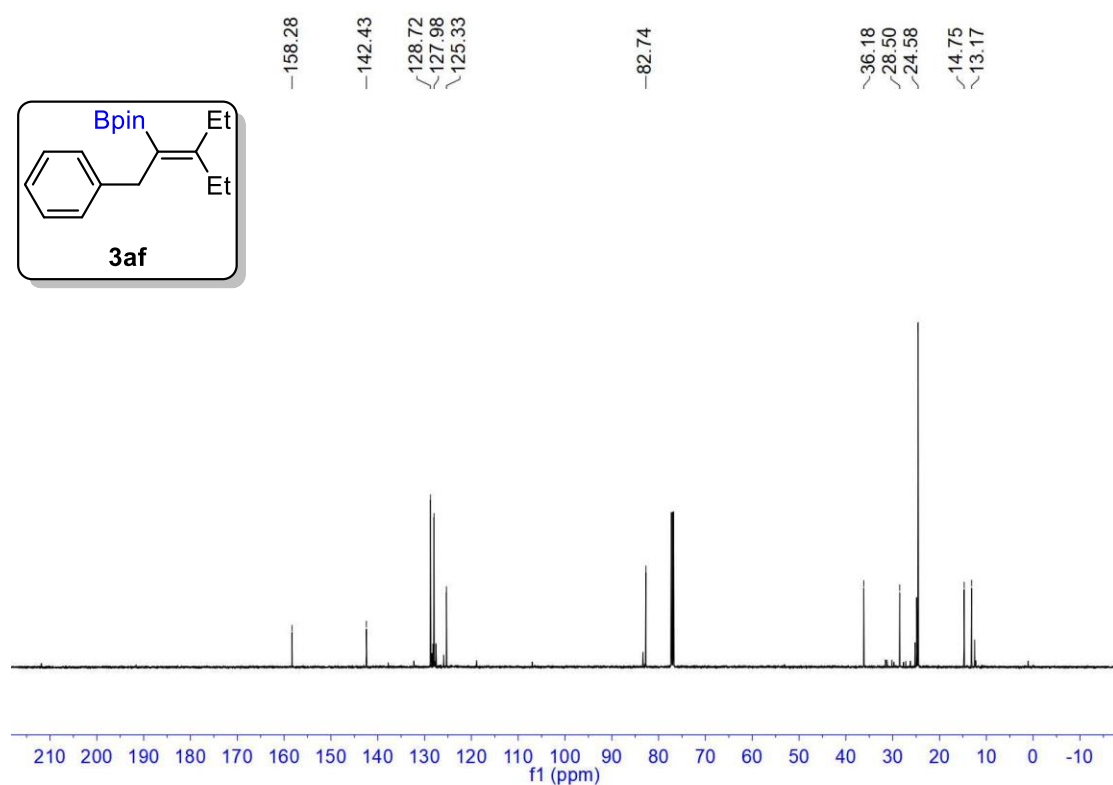



$^{11}\text{B}$  spectra ( $\text{CDCl}_3$ ) of 2-(3-ethyl-1-phenylpent-2-en-2-yl)-4,4,5,5-tetramethyl-1,3,2-dioxaborolane (**3af**)

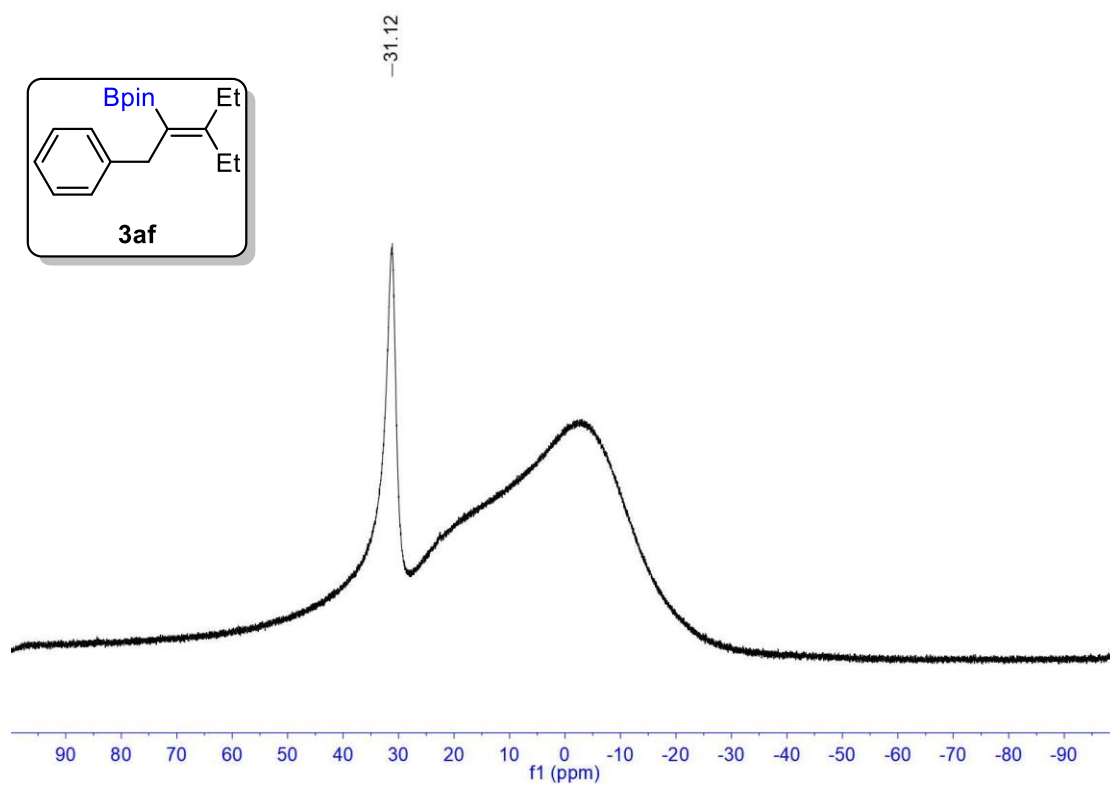

$^1\text{H}$  spectra ( $\text{CDCl}_3$ ) of 2-(1-cyclohexylidene-2-phenylethyl)-4,4,5,5-tetramethyl-1,3,2-dioxaborolane (**3ag**)

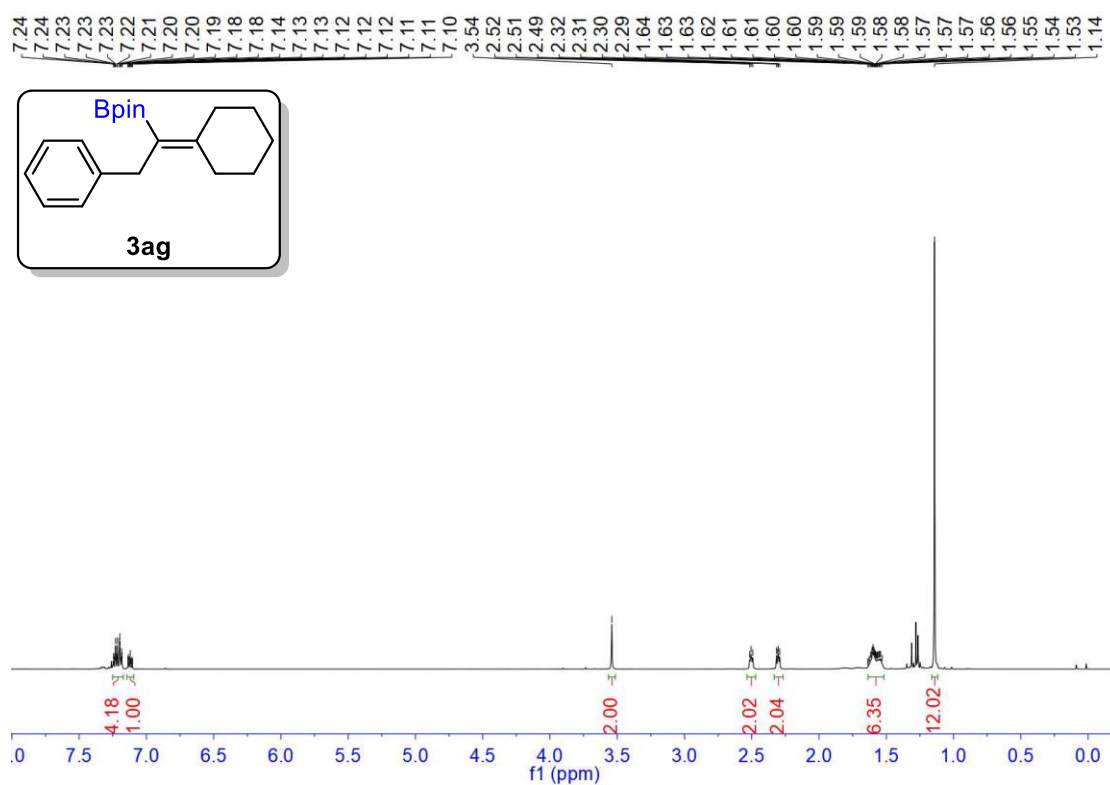

$^{13}\text{C}$  spectra ( $\text{CDCl}_3$ ) of 2-(1-cyclohexylidene-2-phenylethyl)-4,4,5,5-tetramethyl-1,3,2-dioxaborolane (**3ag**)

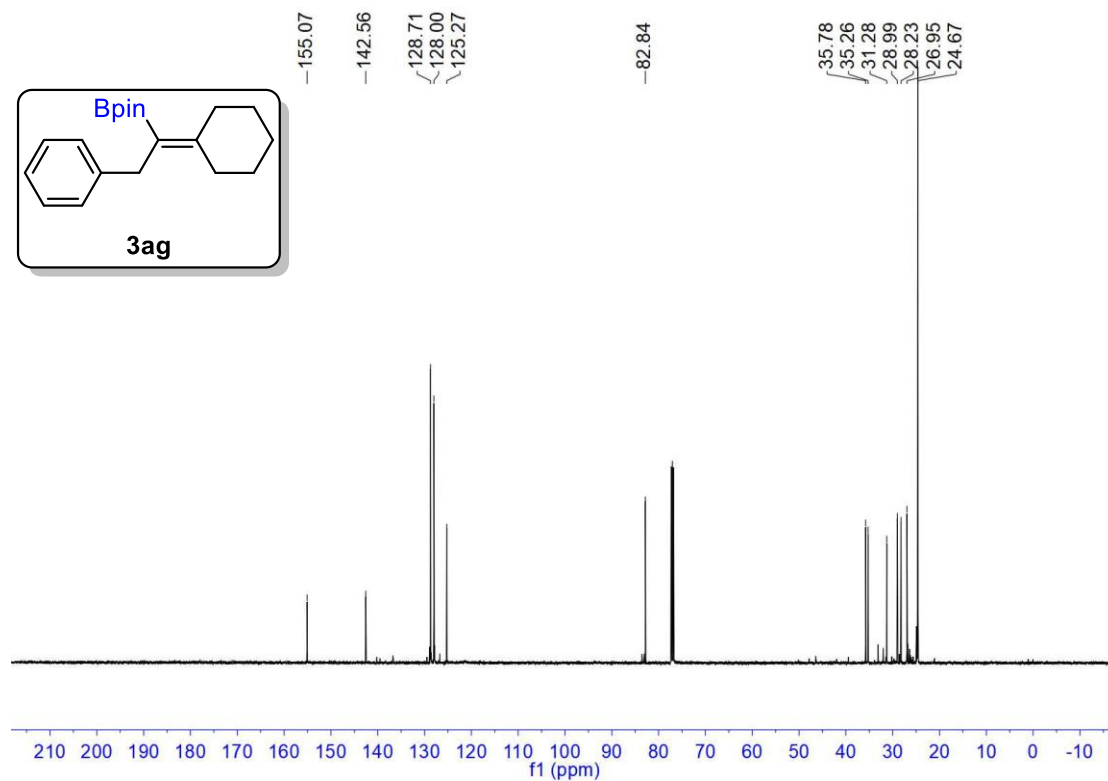

$^{11}\text{B}$  spectra ( $\text{CDCl}_3$ ) of 2-(1-cyclohexylidene-2-phenylethyl)-4,4,5,5-tetramethyl-1,3,2-dioxaborolane (**3ag**)

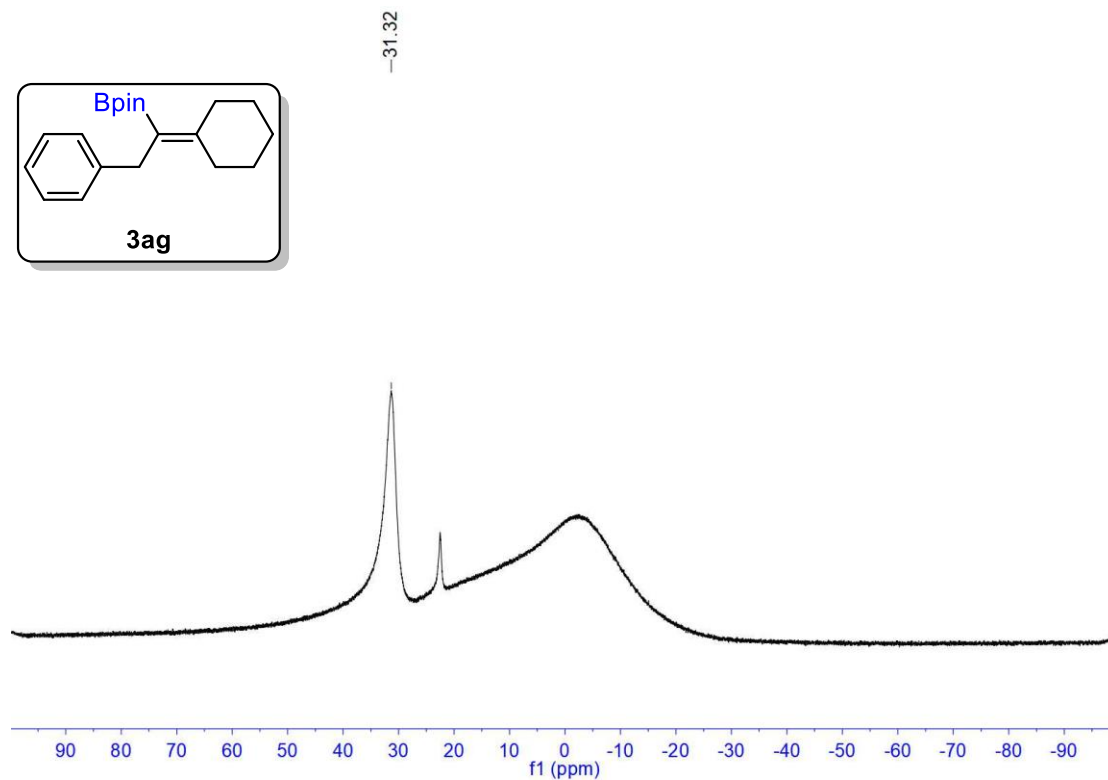

<sup>1</sup>H spectra (CDCl<sub>3</sub>) of 2-(3,4-dimethyl-1-phenylpent-2-en-2-yl)-4,4,5,5-tetramethyl-1,3,2-dioxaborolane

**(3ah)**

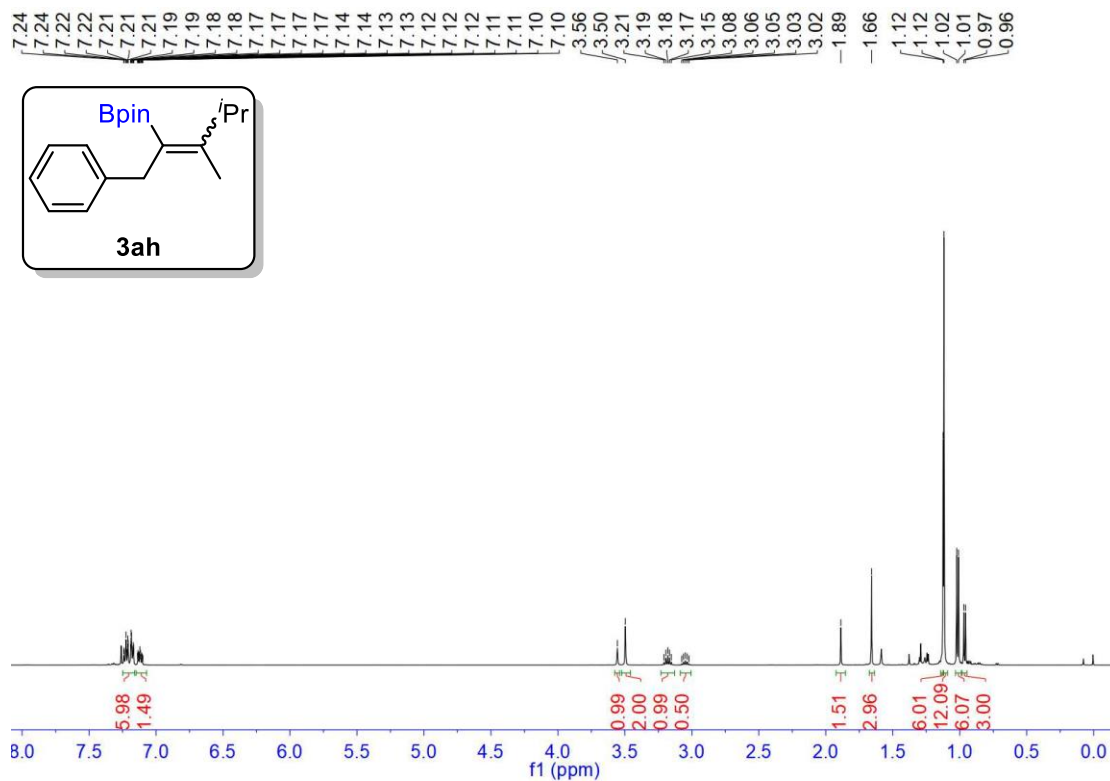

<sup>13</sup>C spectra (CDCl<sub>3</sub>) of 2-(3,4-dimethyl-1-phenylpent-2-en-2-yl)-4,4,5,5-tetramethyl-1,3,2-dioxaborolane (**3ah**)

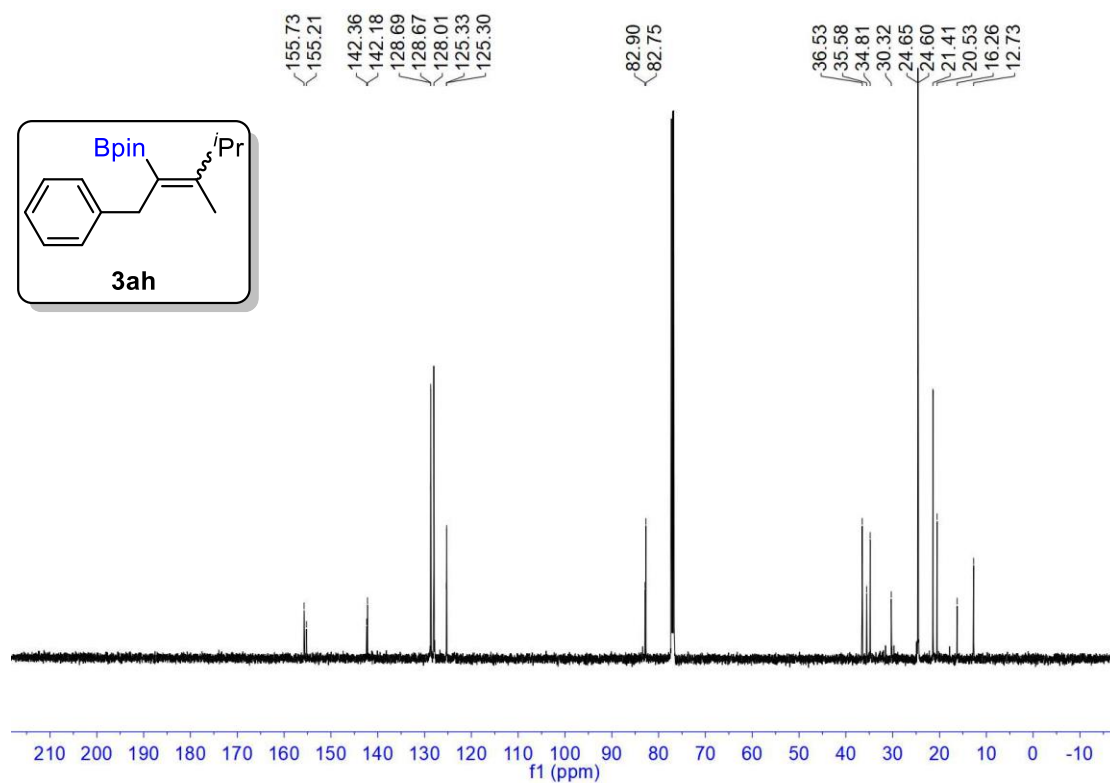

$^{11}\text{B}$  spectra ( $\text{CDCl}_3$ ) of 2-(3,4-dimethyl-1-phenylpent-2-en-2-yl)-4,4,5,5-tetramethyl-1,3,2-dioxaborolane (**3ah**)

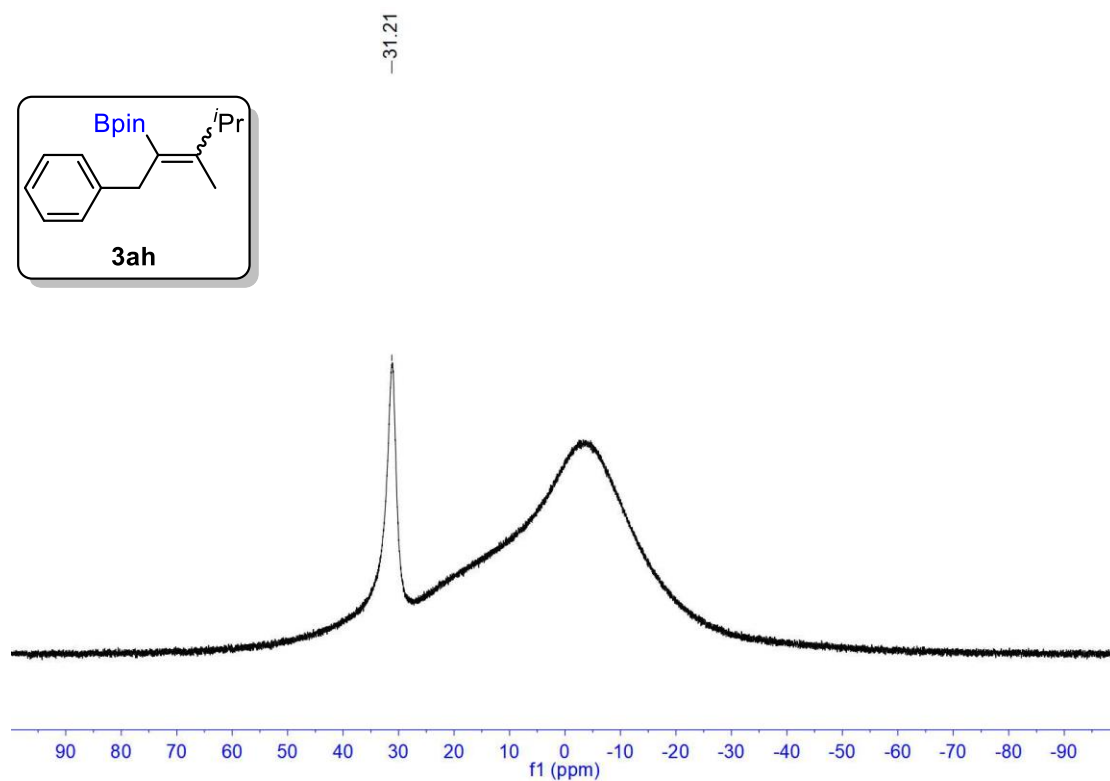

$^1\text{H}$  spectra ( $\text{CDCl}_3$ ) of 4,4,5,5-tetramethyl-2-(1-phenylpent-2-en-2-yl)-1,3,2-dioxaborolane (**3ai**)

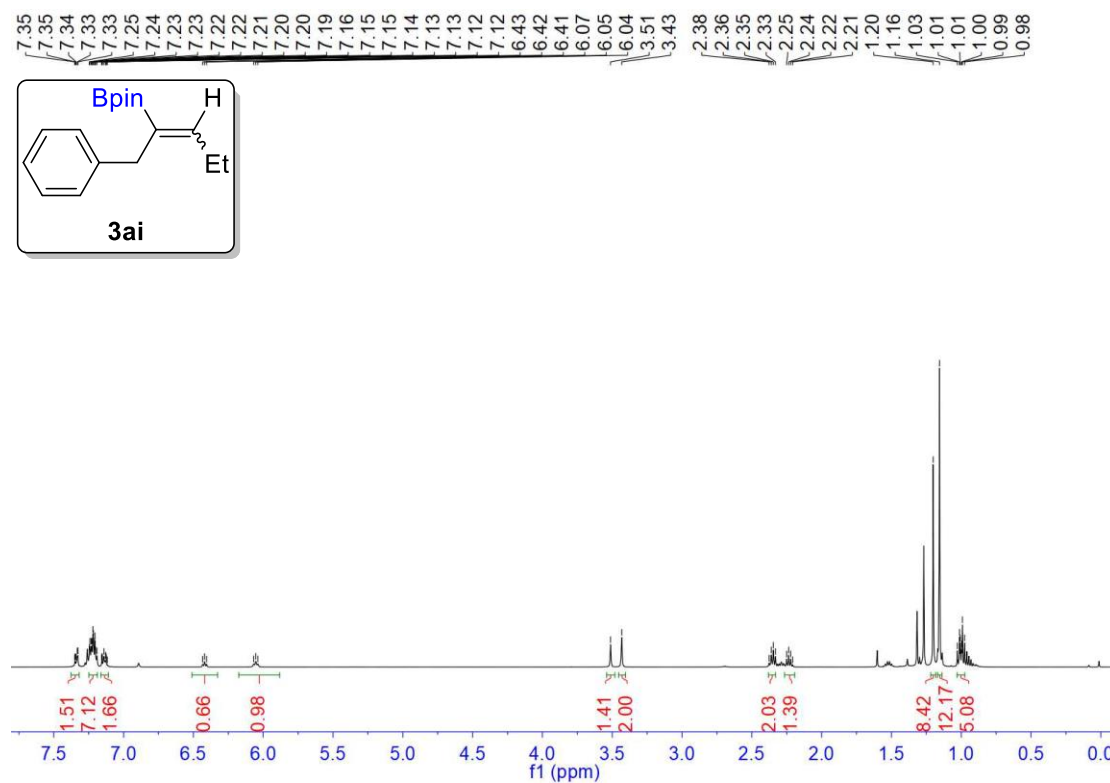

$^{13}\text{C}$  spectra ( $\text{CDCl}_3$ ) of 4,4,5,5-tetramethyl-2-(1-phenylpent-2-en-2-yl)-1,3,2-dioxaborolane (**3ai**)

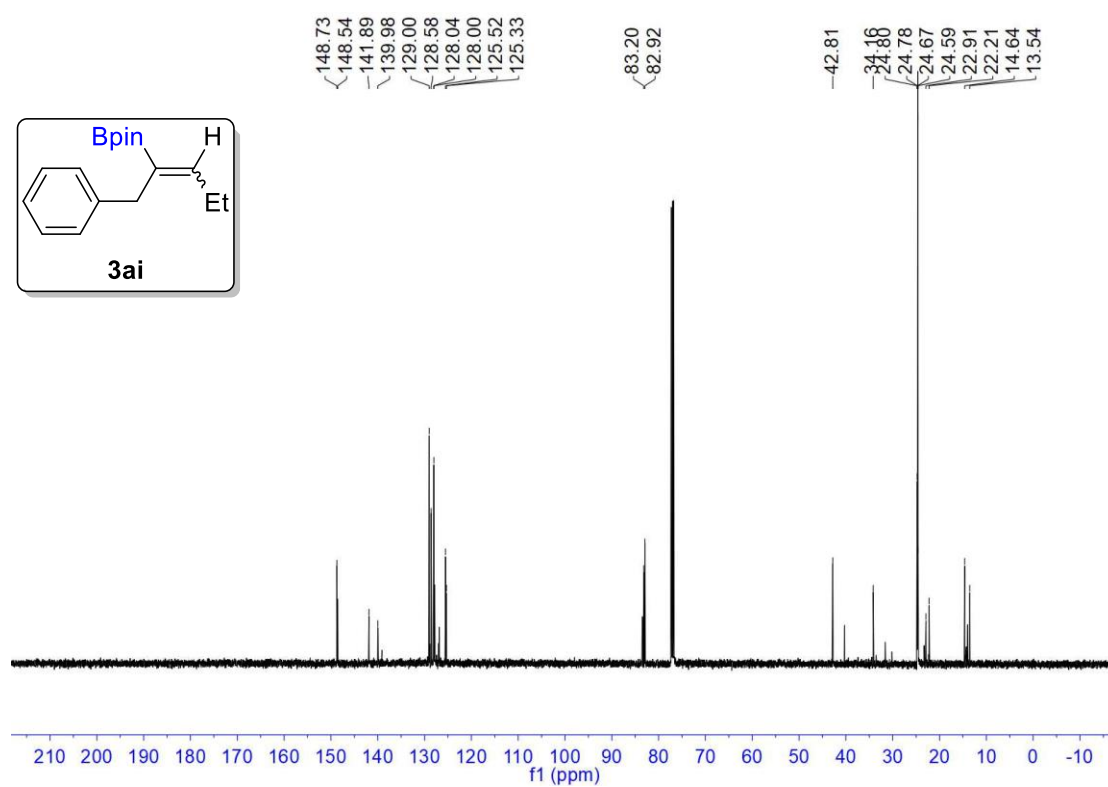

$^{11}\text{B}$  spectra ( $\text{CDCl}_3$ ) of 4,4,5,5-tetramethyl-2-(1-phenylpent-2-en-2-yl)-1,3,2-dioxaborolane (**3ai**)

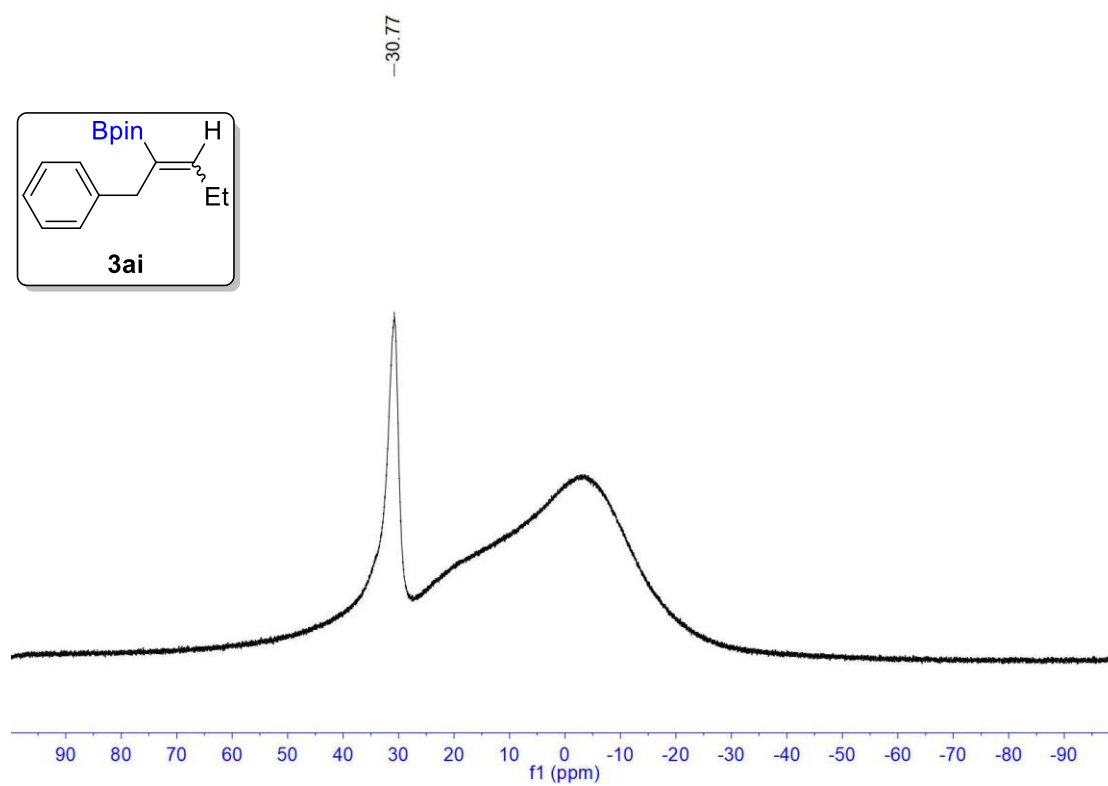

$^1\text{H}$  spectra ( $\text{CDCl}_3$ ) of 2-(1-([1,1'-biphenyl]-4-yl)-3-methylbut-2-en-2-yl-1,1-d<sub>2</sub>)-4,4,5,5-tetramethyl-1,3,2-dioxaborolane (**3a-d**)

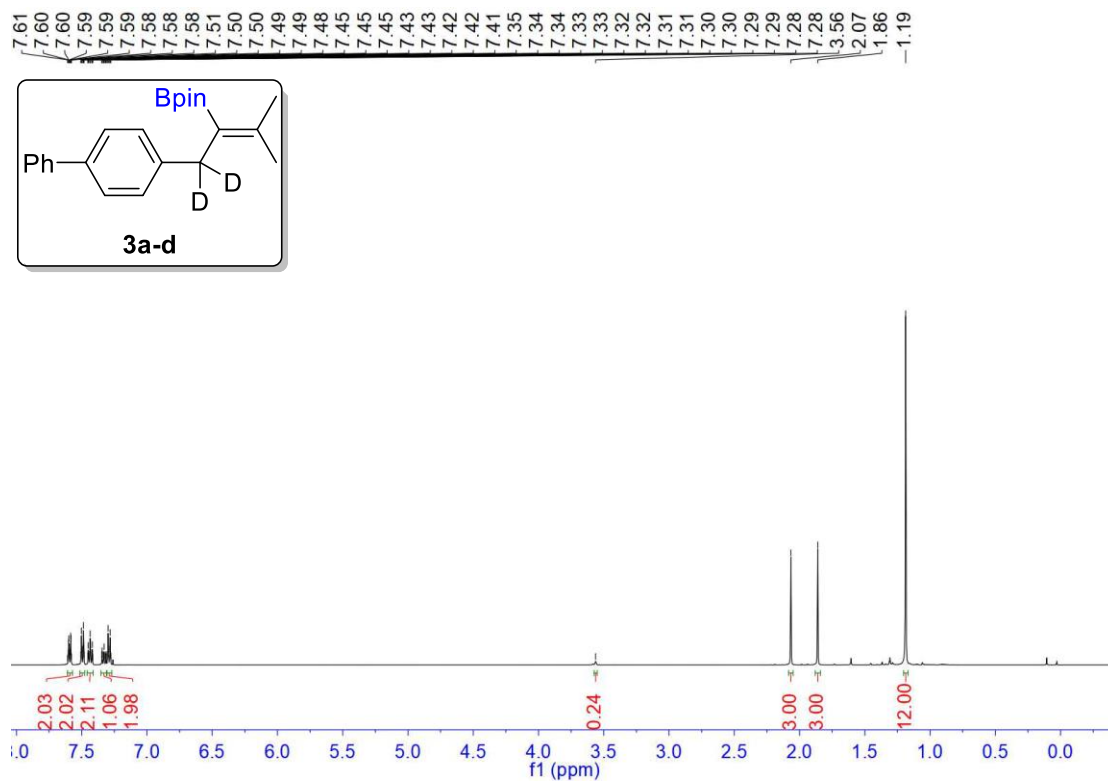

$^{13}\text{C}$  spectra ( $\text{CDCl}_3$ ) of 2-(1-([1,1'-biphenyl]-4-yl)-3-methylbut-2-en-2-yl-1,1-d<sub>2</sub>)-4,4,5,5-tetramethyl-1,3,2-dioxaborolane (**3a-d**)

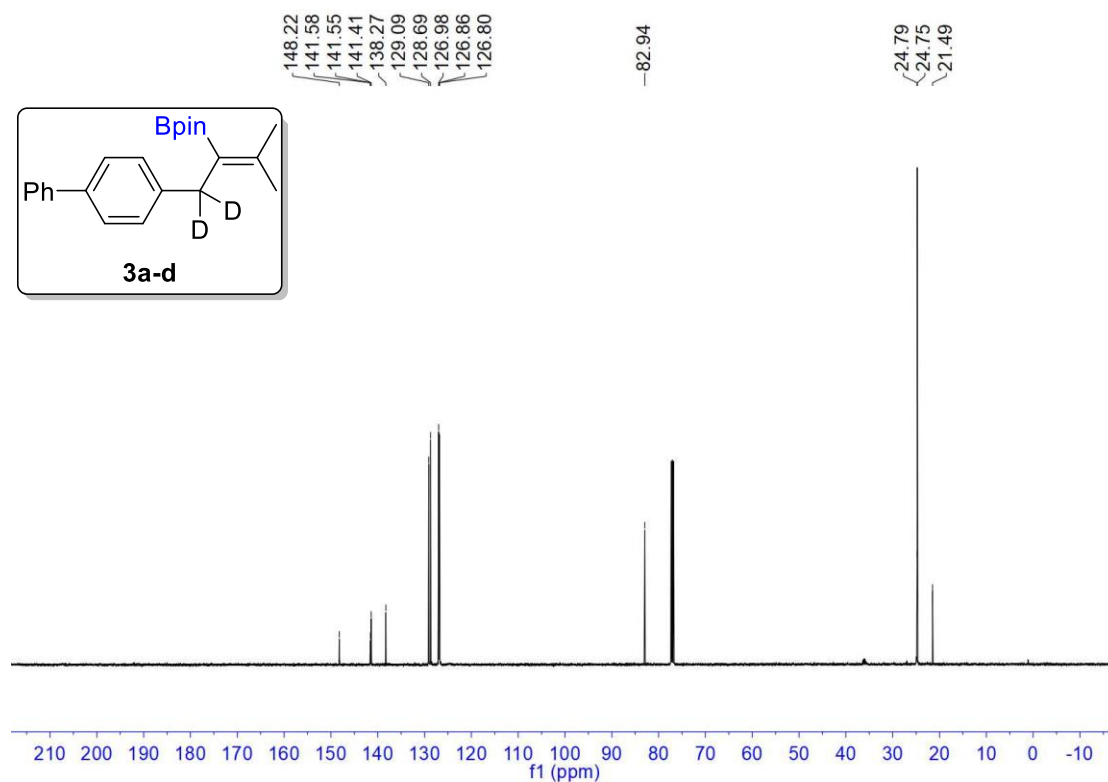

$^{11}\text{B}$  spectra ( $\text{CDCl}_3$ ) of 2-(1-([1,1'-biphenyl]-4-yl)-3-methylbut-2-en-2-yl)-1,1-d $_2$ -4,4,5,5-tetramethyl-1,3,2-dioxaborolane (**3a-d**)

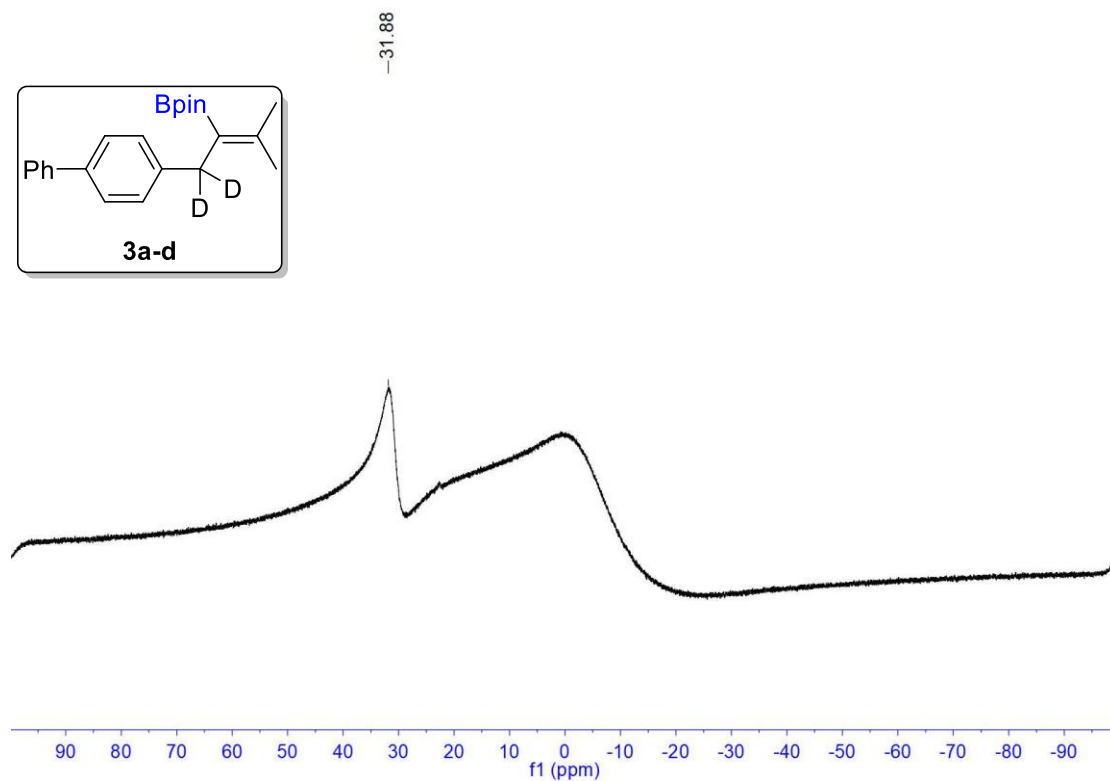

$^1\text{H}$  spectra ( $\text{CDCl}_3$ ) of 1-([1,1'-biphenyl]-4-yl)-3-methylbutan-2-one (**4**)

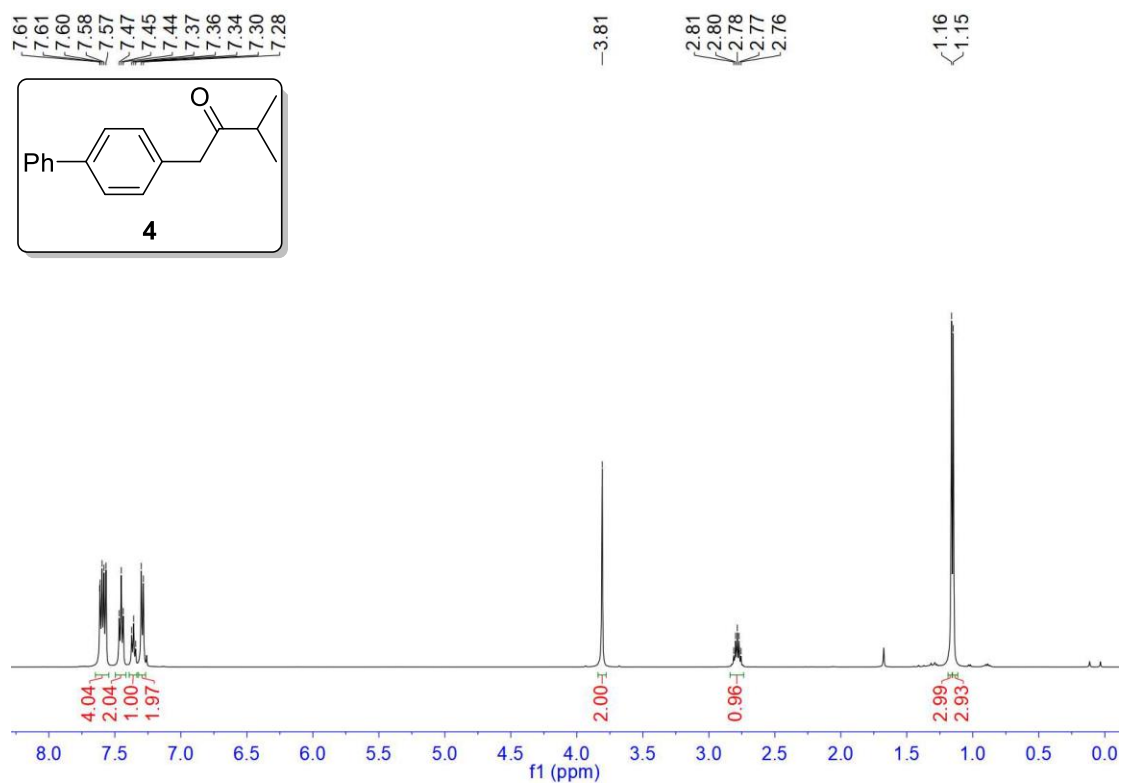

$^{13}\text{C}$  spectra ( $\text{CDCl}_3$ ) of 1-([1,1'-biphenyl]-4-yl)-3-methylbutan-2-one (**4**)

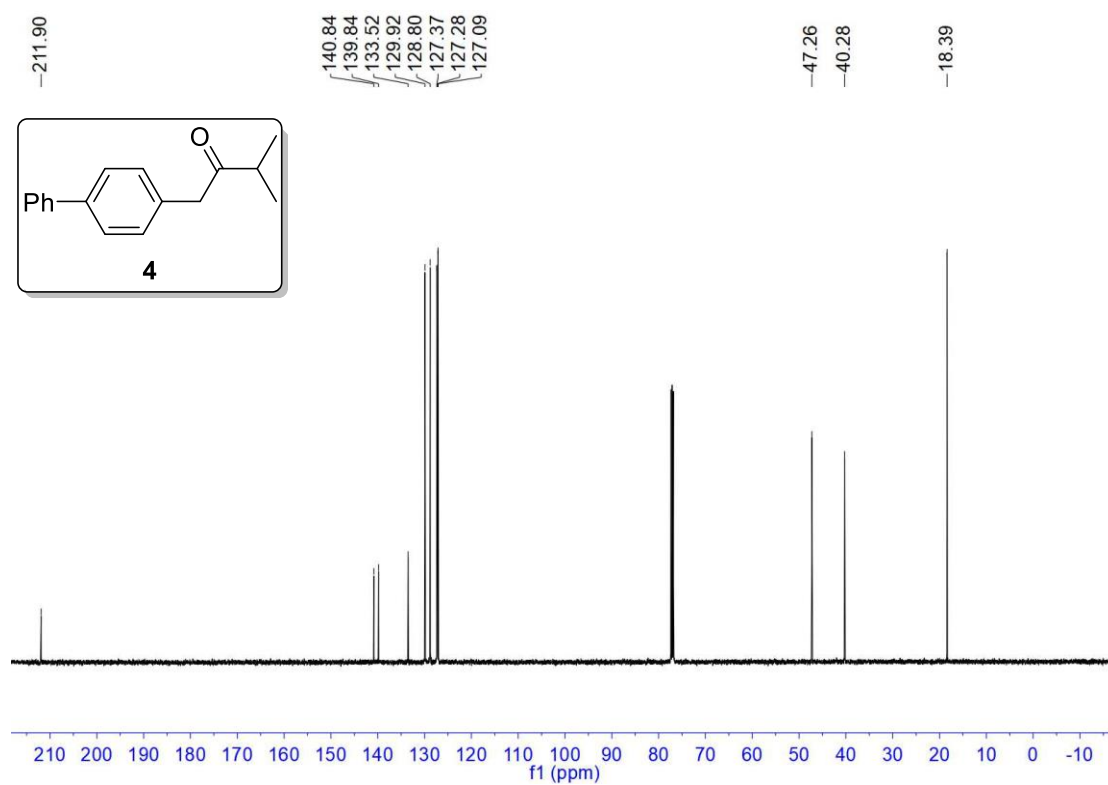

$^1\text{H}$  spectra ( $\text{CDCl}_3$ ) of 2-(1-([1,1'-biphenyl]-4-yl)-3-methylbut-2-en-2-yl)thiophene (**5**)

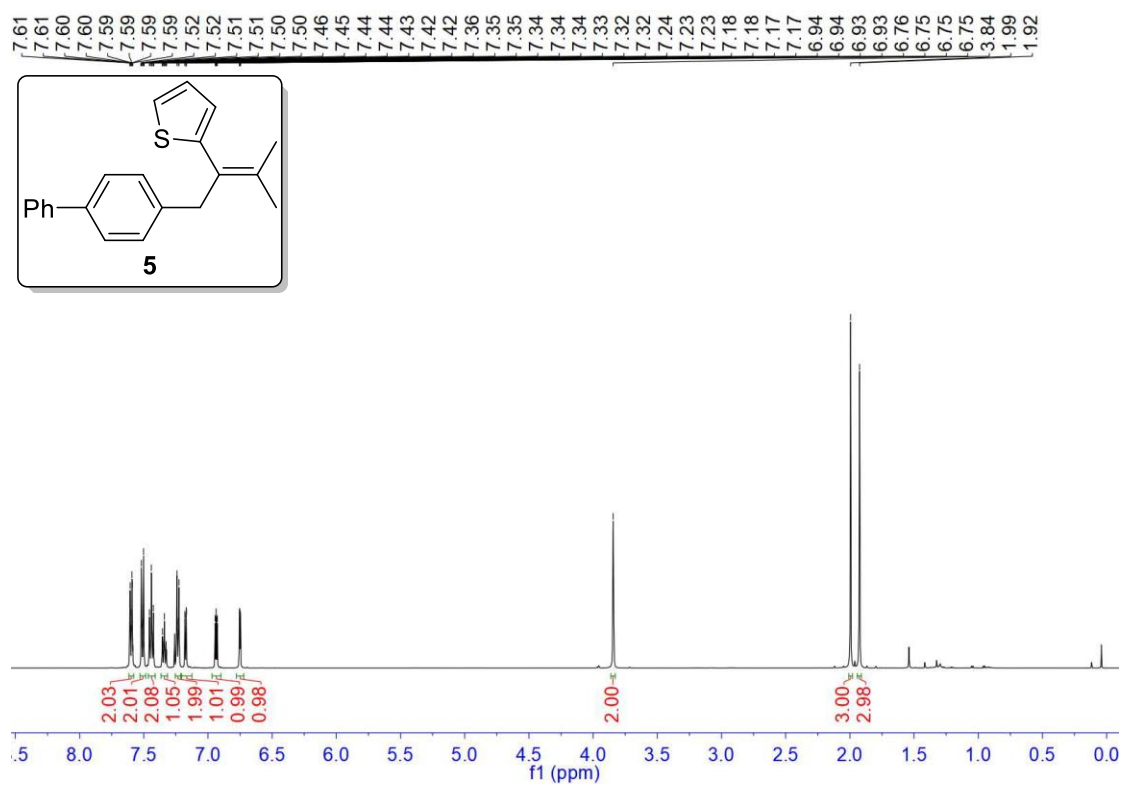



$^{13}\text{C}$  spectra ( $\text{CDCl}_3$ ) of 2-(1-([1,1'-biphenyl]-4-yl)-3-methylbut-2-en-2-yl)thiophene (**5**)

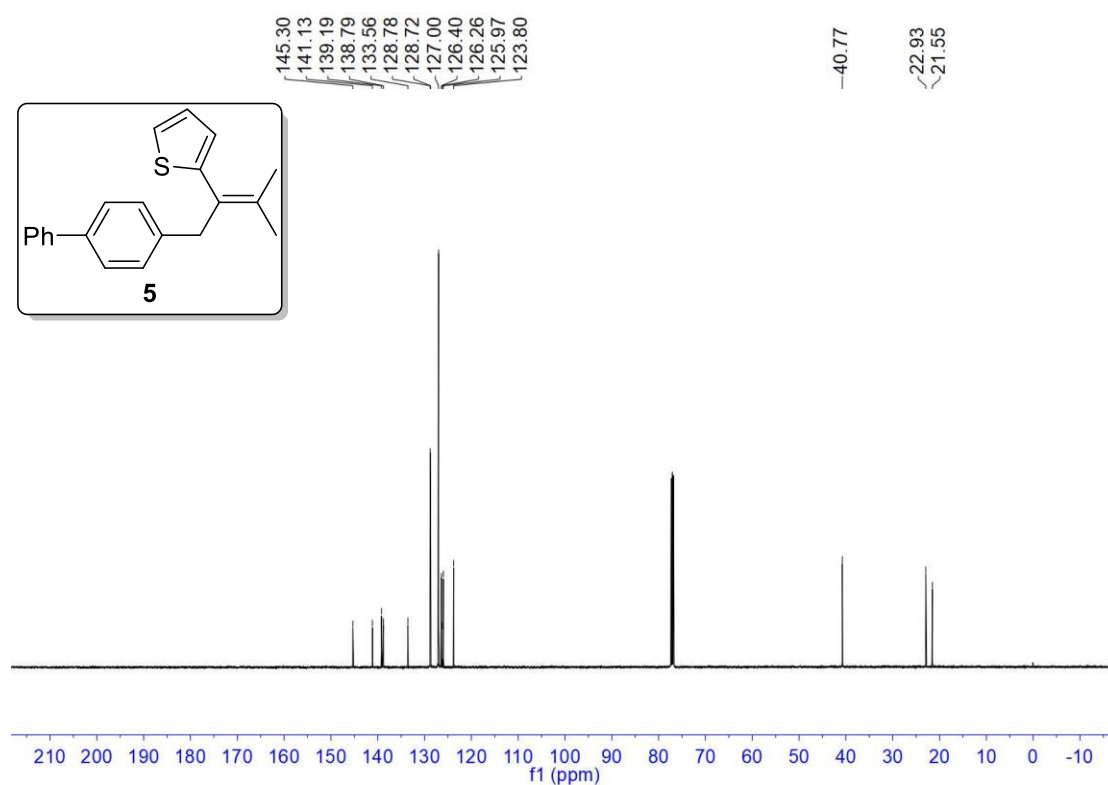

$^1\text{H}$  spectra ( $\text{CDCl}_3$ ) of 2-(1-([1,1'-biphenyl]-4-yl)-3-methylbut-2-en-2-yl)furan (**6**)

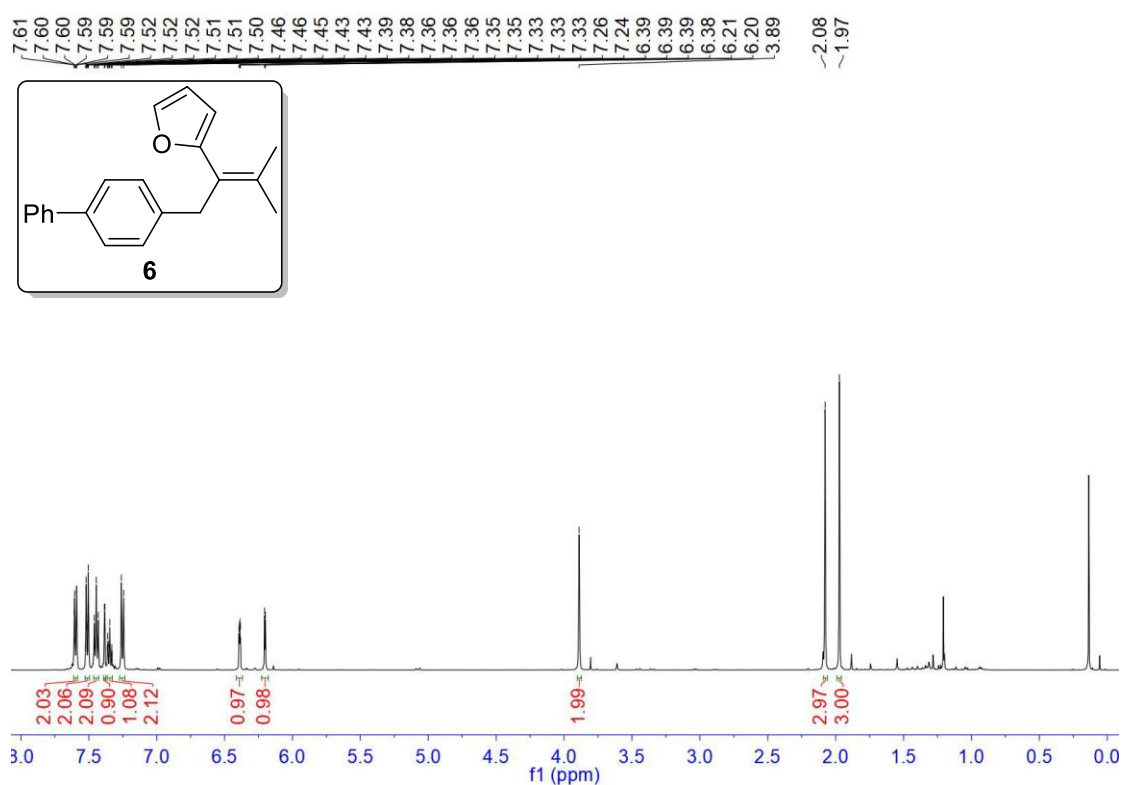

$^{13}\text{C}$  spectra ( $\text{CDCl}_3$ ) of 2-(1-([1,1'-biphenyl]-4-yl)-3-methylbut-2-en-2-yl)furan (**6**)

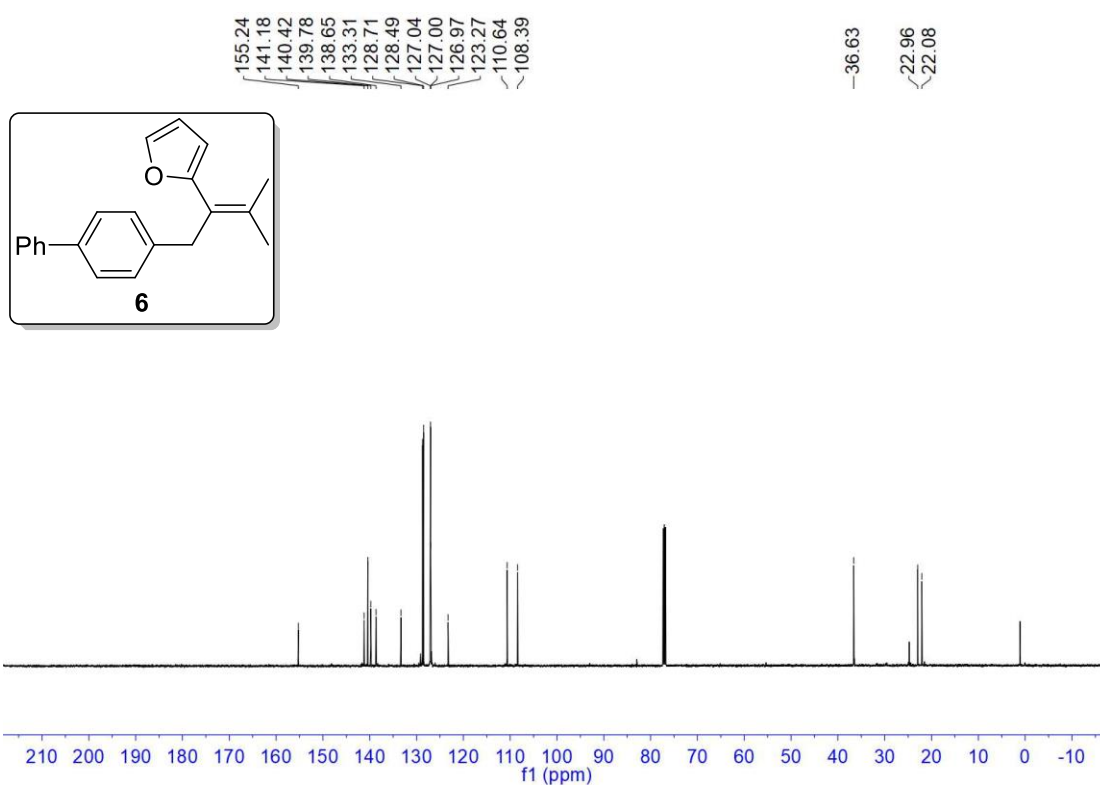

$^1\text{H}$  spectra ( $\text{CDCl}_3$ ) of 4-(3-methyl-2-phenylbut-2-en-1-yl)-1,1'-biphenyl (**7**)

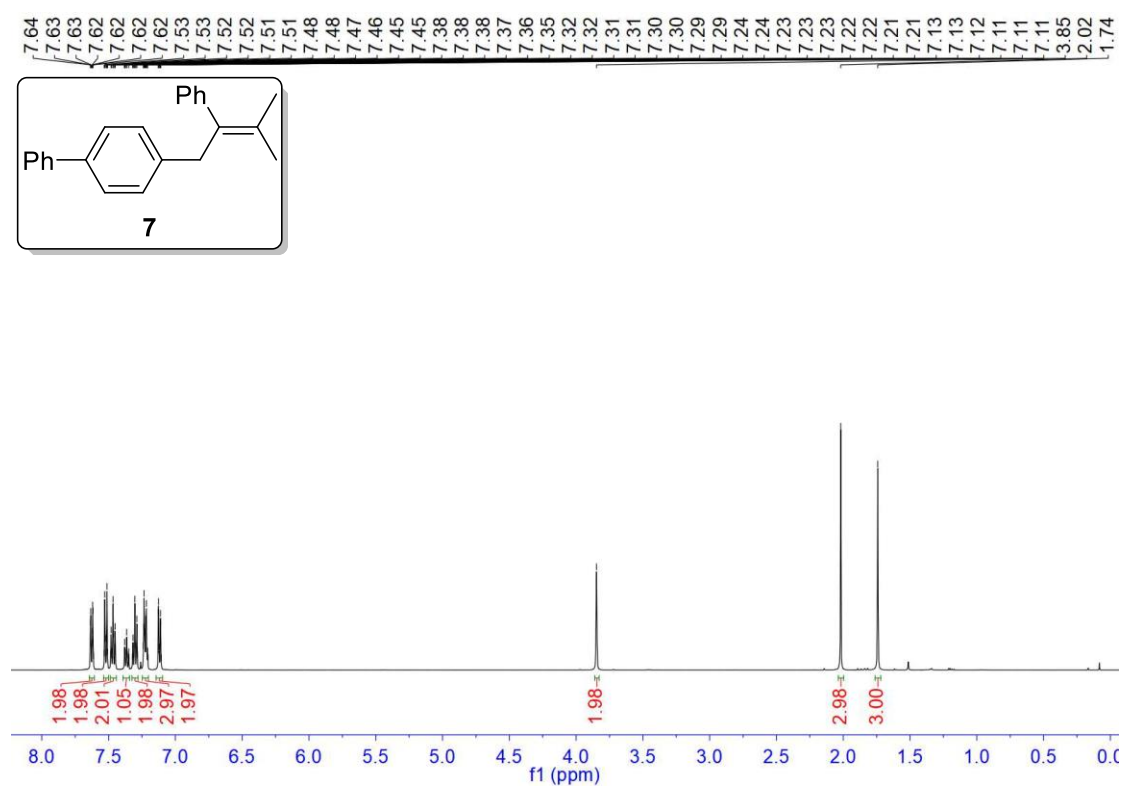

$^{13}\text{C}$  spectra ( $\text{CDCl}_3$ ) of 4-(3-methyl-2-phenylbut-2-en-1-yl)-1,1'-biphenyl (**7**)

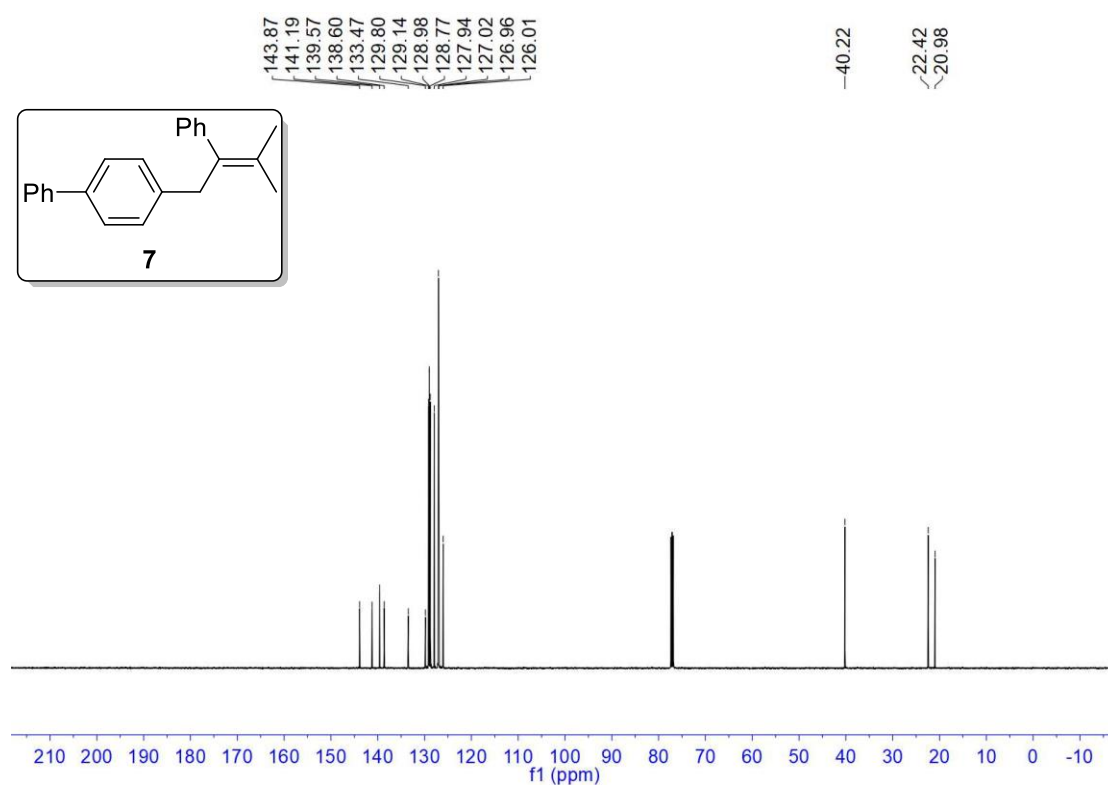

$^1\text{H}$  spectra ( $\text{CDCl}_3$ ) of 2-(2-([1,1'-biphenyl]-4-ylmethyl)-3-methylbut-2-en-1-yl)-4,4,5,5-tetramethyl-1,3,2-dioxaborolane (**8**)

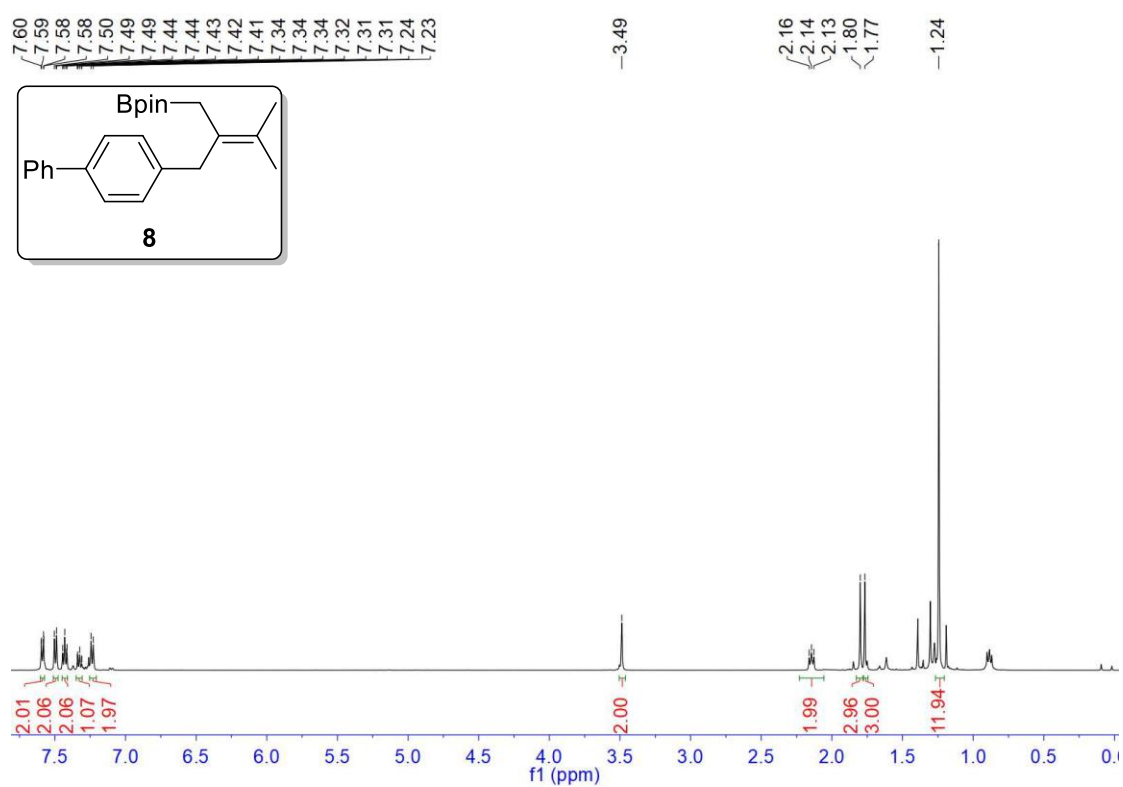

$^{13}\text{C}$  spectra ( $\text{CDCl}_3$ ) of 2-(2-([1,1'-biphenyl]-4-ylmethyl)-3-methylbut-2-en-1-yl)-4,4,5,5-tetramethyl-1,3,2-dioxaborolane (**8**)

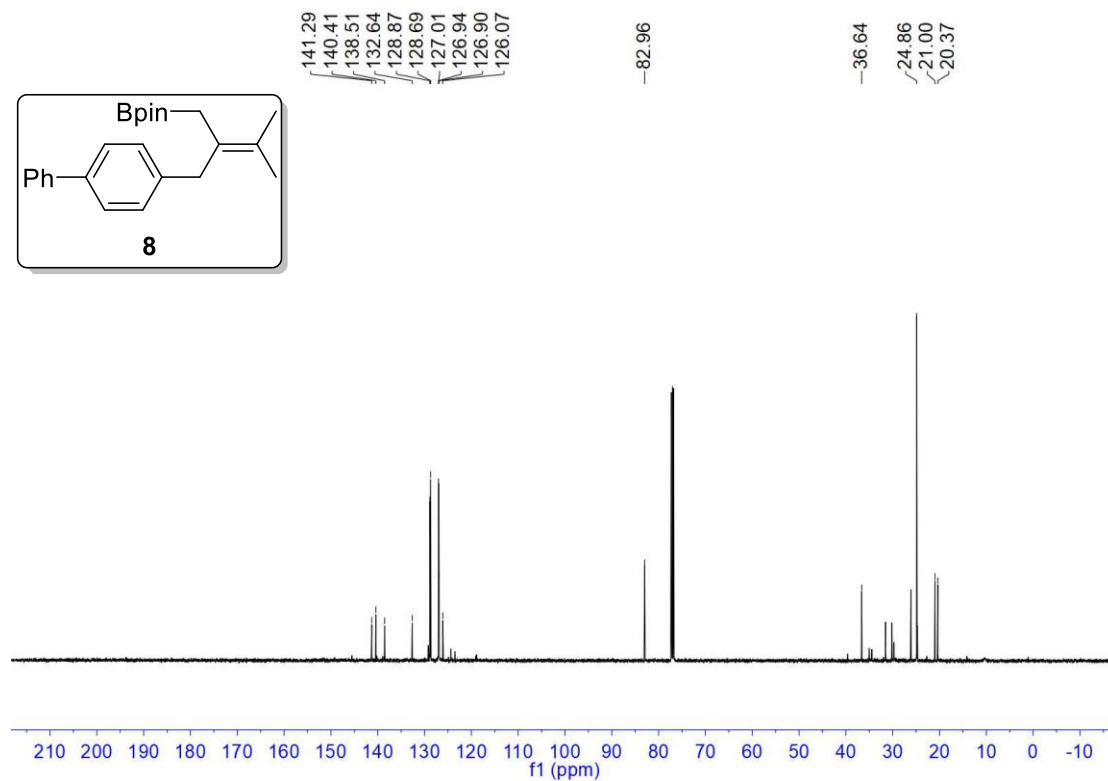

$^{11}\text{B}$  spectra ( $\text{CDCl}_3$ ) of 2-(2-([1,1'-biphenyl]-4-ylmethyl)-3-methylbut-2-en-1-yl)-4,4,5,5-tetramethyl-1,3,2-dioxaborolane (**8**)

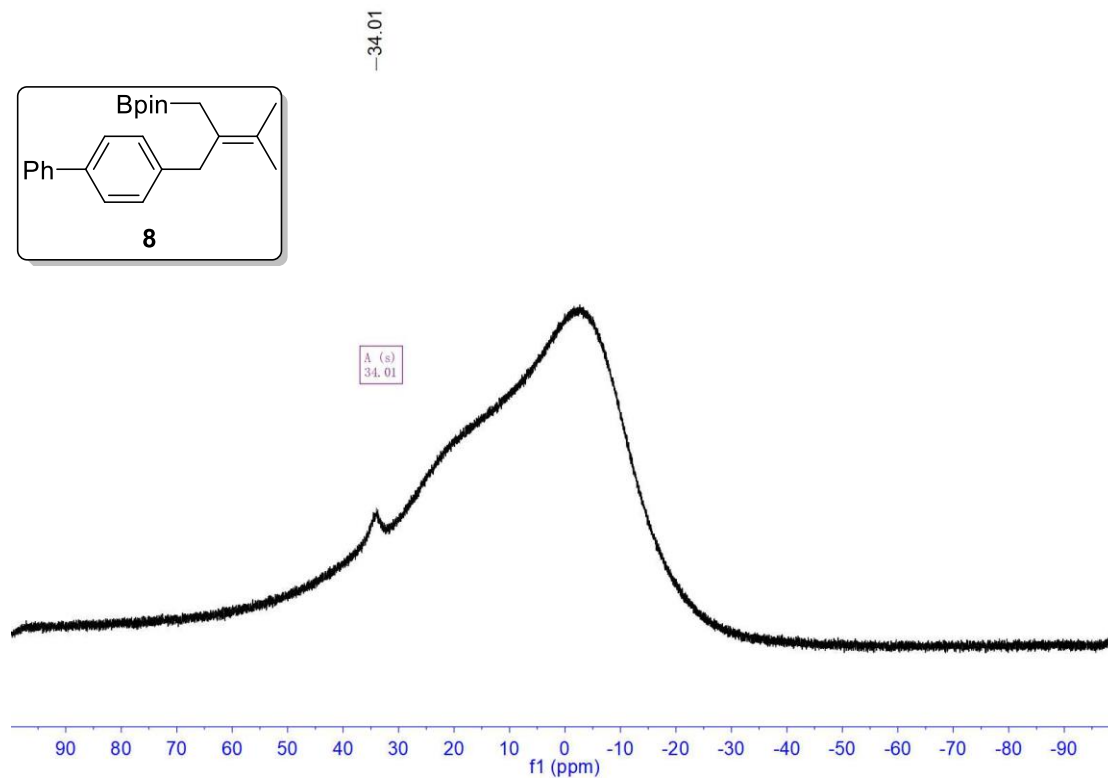

<sup>1</sup>H spectra (CDCl<sub>3</sub>) of 4-(2-iodo-3-methylbut-2-en-1-yl)-1,1'-biphenyl (**9**)

7.61  
7.60  
7.60  
7.59  
7.59  
7.58  
7.56  
7.56  
7.55  
7.54  
7.54  
7.53  
7.45  
7.44  
7.43  
7.43  
7.42  
7.42  
7.35  
7.35  
7.35  
7.34  
7.33  
7.33  
7.32  
7.32  
7.32  
7.28  
7.28  
7.27  
7.26  
4.03  
2.05  
2.00

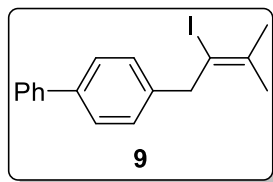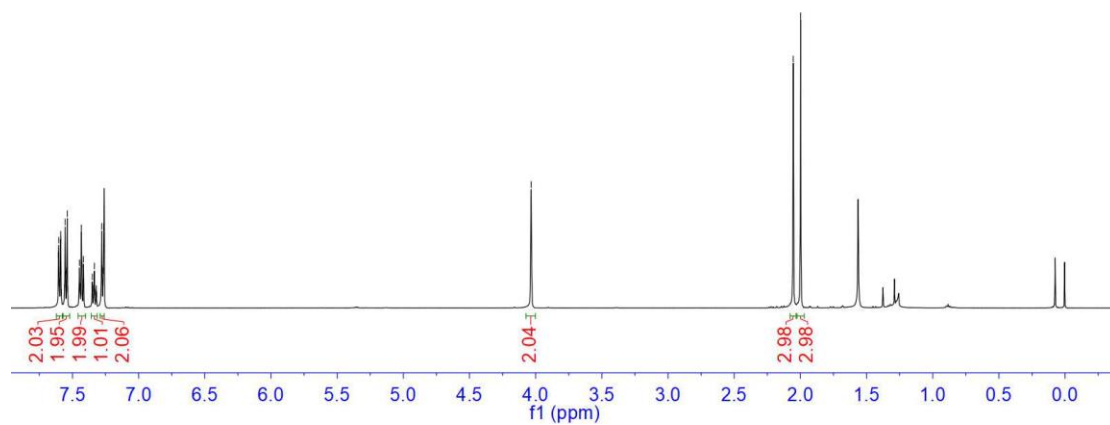

<sup>13</sup>C spectra (CDCl<sub>3</sub>) of 4-(2-iodo-3-methylbut-2-en-1-yl)-1,1'-biphenyl (**9**)

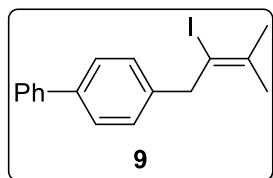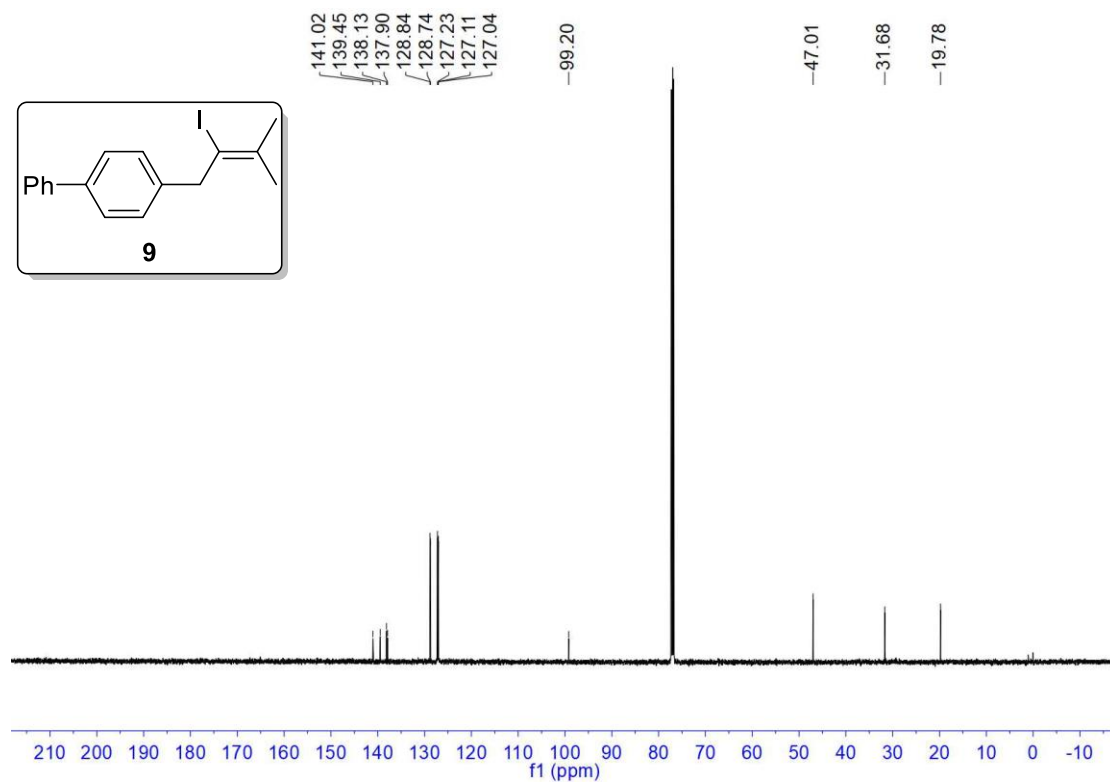

Supplement: d2qo01576e1.pdf [file d2qo01576e1.pdf]
